# Supplementary material for: Genomic Consequences of Long-Term Population Decline in Brown Eared Pheasant
Source: PubMed Central journal article supplement — Mol Biol Evol. 2020 Aug 27;38(1):263–73. doi: 10.1093/molbev/msaa213 (PMC7783171; doi:10.1093/molbev/msaa213), 2020-08-27
Supplement: msaa213_supplementary_data.pdf [file msaa213_supplementary_data.pdf]

1 **Supplementary Information for**

2 Genomic Consequences of Long-term Population Decline in Brown Eared Pheasant

3  
4 Pengcheng Wang,<sup>1,2,3</sup> John T. Burley,<sup>4</sup> Yang Liu,<sup>5</sup> Jiang Chang,<sup>6</sup> De Chen,<sup>1</sup> Qi Lu,<sup>1</sup>  
5 Shou-hsien Li,<sup>7</sup> Xuming Zhou,<sup>2</sup> Scott Edwards,<sup>\*,3</sup> Zhengwang Zhang<sup>\*,1</sup>

6  
7 <sup>1</sup>. Ministry of Education Key Laboratory for Biodiversity and Ecological Engineering,  
8 College of Life Sciences, Beijing Normal University, Beijing 100875, China

9 <sup>2</sup>. Key Laboratory of Animal Ecology and Conservation Biology, Institute of Zoology,  
10 Chinese Academy of Sciences, Beijing 100101, China

11 <sup>3</sup>. Department of Organismic and Evolutionary Biology / Museum of Comparative  
12 Zoology, Harvard University, Cambridge, MA 02138, USA

13 <sup>4</sup>. Department of Ecology and Evolutionary Biology / Institute at Brown for  
14 Environment and Society, Brown University, Providence, RI 02912, USA

15 <sup>5</sup>. State Key Laboratory of Biocontrol, School of Ecology, Sun Yat-sen University,  
16 Guangzhou, 510275, China

17 <sup>6</sup>. State Key Laboratory of Environmental Criteria and Risk Assessment, Chinese  
18 Research Academy of Environmental Sciences, Beijing 100012, China

19 <sup>7</sup>. School of Life Science, National Taiwan Normal University, Taipei 11677, Taiwan,  
20 China

21  
22 \* **Co-corresponding authors:** E-mails: zzw@bnu.edu.cn; sedwards@fas.harvard.edu

23  
24 **This PDF file includes:**

25  
26 Supplementary Information Text

27 Figures S1 to S20

28 Datasets S1 to S12

29 **Supplementary Information Text**

30

31 **DNA sample collection**

32 Tissue for *de novo* whole genome sequencing was obtained from a female Brown eared  
33 pheasant (*Crossoptilon mantchuricum*) from the central population in the Pangquangou  
34 National Natural Reserve, Jiaocheng, Shanxi Province, China. For genome re-  
35 sequencing, tissue samples were obtained from 11, 18, and 11 individuals from Shanxi  
36 (Central population, Brown-C), Shaanxi (Western population, Brown-W), Hebei, and  
37 Beijing (Eastern population, Brown-E), respectively. The blue eared pheasant (*C.*  
38 *auritum*) was used as the control group in this study, of which 11 individuals were  
39 sampled for re-sequencing (the geographic distribution of the studied populations can  
40 be seen in Fig. 1a and S12. Sampling information can be seen in Dataset S9). All  
41 samples were stored at -80 °C at Beijing Normal University. For genome annotation,  
42 we also sequenced the transcriptome of the *C. mantchuricum* individual used for the *de*  
43 *nov*o genome assembly using blood samples, developing tail feathers, and primaries.  
44 The tissues used to isolate the RNA were mixed with an RNA preservation solution  
45 (RNA-In-Safe; Sangon Biotech, Beijing, China). All tissues used for transcriptome  
46 sequencing were stored in liquid nitrogen. Sample collection was performed by an  
47 accredited veterinarian, and all sampling procedures were approved by the Forestry  
48 Department of China and the Ethics and Animal Welfare Committee at the College of  
49 Life Science, Beijing Normal University, China (Approval Number CLS-EAW-2015-  
50 012).

51

52 **DNA, RNA isolation, sequencing, and data filtering**

53 DNA and RNA isolation and library construction were performed at the Novogene  
54 Sequence Center (Beijing, China). DNA and RNA quality and quantity were evaluated  
55 using a Nanodrop spectrophotometer, a Qubit Fluorometer, an Agilent 2100, and gel  
56 electrophoresis. Fragment libraries (insert length 250 bp) and jumping libraries (insert  
57 lengths 2000 bp and 5000 bp) were constructed for *de novo* genome sequencing. For *de*

58 *nov*o genome sequencing, the targeted total amount of sequences from the fragment  
59 libraries and jumping libraries was ~150 Gb (~150×) and ~100 Gb (~100×),  
60 respectively. A total of 51 fragment libraries (insert length 350 bp) were constructed for  
61 genome re-sequencing, targeting more than 15× coverage per individual. The targeted  
62 total amount of transcriptome sequences was ~190 Gb from the RNA libraries (insert  
63 length 250 bp). All libraries were sequenced on the Illumina HiSeq platform at the  
64 paired-end 150 bp. Adapter content was trimmed and five base pairs were removed  
65 from both the 5' and 3' ends of each read in Trim Galore v0.4.2, with other default  
66 parameters ([http://www.bioinformatics.babraham.ac.uk/projects/trim\\_galore/](http://www.bioinformatics.babraham.ac.uk/projects/trim_galore/)). FastQC  
67 v0.11.5 (<http://www.bioinformatics.babraham.ac.uk/projects/fastqc/>) was used to  
68 assess the quality of the raw sequencing data and clean data.

69

### 70 **Genome assembly and evaluation**

71 After removing the low-quality data, 220.6 Gb of DNA data (1.37 billion reads, 195.6-  
72 fold sequence coverage) were used for the *de novo* genome assembly of *C.*  
73 *mantchuricum* in ALLPATHS-LG v52488 (Butler, et al. 2008). Basic metrics (e.g.,  
74 scaffold and contig N50) were calculated from the genome assembly with a minimum  
75 contig length of 100 bp. We used BUSCO v3 (Simão, et al. 2015) to evaluate the  
76 completeness of the draft genome by searching for 4915 Benchmarking Universal  
77 Single-Copy Orthologs from 40 avian lineages (aves\_odb9 dataset) in the *C.*  
78 *mantchuricum* assembly.

79

### 80 **Genome annotation**

81 The *de novo* repetitive elements annotation was performed in RepeatModeler-open  
82 v4.0.6 (<http://www.repeatmasker.org/>) with repeat masker libraries v20160829 (Bao,  
83 et al. 2015) and repeat finding programs (RECON v1.08  
84 (<http://selab.janelia.org/recon.html>) and RepeatScout v1.0.5  
85 (<http://repeatscout.bioprotects.org/>)). Repetitive elements were identified with  
86 RepeatMasker-open v4.0.6, in which repetitive elements were searched against *de novo*

87 repetitive elements and homologous sequences (Dfam 2.0 database (Hubley, et al. 2015)  
88 and RepBase database v20160829 (Bao, et al. 2015) ). Tandem repeats were identified  
89 across the genome using Tandem Repeats Finder v404 (Benson 1999). The repetitive  
90 elements were masked in the whole genome for annotation purposes.

91

92 We employed an integrative approach to identify a protein-coding gene set of the  
93 repeated-masked genome in MAKER v2.31.8 ([http://www.yandell-](http://www.yandell-lab.org/software/maker.html)  
94 [lab.org/software/maker.html](http://www.yandell-lab.org/software/maker.html)), which used homologous genes, *ab initio* predictions,  
95 expressed sequence tags (ESTs), and RNA sequence evidence. The homologous gene  
96 sets were from human, zebra finch, chicken, and turkey protein sequences downloaded  
97 from Ensembl genome browser 87 (<http://useast.ensembl.org/info/data/ftp/index.html>).

98 The *ab initio* prediction was performed in both SNAP (Korf 2004) and AUGUSTUS  
99 v3.0.3 (Stanke and Waack 2003). The 80.0-Gb clean RNA sequences were used to  
100 produce splice junction information of the repeat-masked draft genome in TopHat  
101 v2.0.13 (<http://ccb.jhu.edu/software/tophat/index.shtml>) and to *de novo* assemble  
102 mRNA-sequences in Trinity v2.3.2 (Grabherr, et al. 2011). To improve the accuracy of  
103 the annotation procedure, we ran MAKER twice. For the initial MAKER run, both the  
104 AUGUSTUS chicken models and SNAP chicken models that we trained were used to  
105 predict the coding genes. The assembled chromosomes and annotation file of  
106 *Gallus\_gallus*-5.0 (Consortium 2004) were used to train the SNAP chicken models.  
107 After the initial MAKER run, we used the gene models produced during the initial  
108 MAKER run to retrain AUGUSTUS and SNAP. For the final MAKER run, we used the  
109 retrained gene predictors to obtain a consensus set of protein-coding genes. In both  
110 MAKER runs, the minimum length required for single exon ESTs was set to 250 bp.  
111 The gene set preserved genes that encoded 20 or more amino acids (Eilbeck, et al. 2009).  
112 To identify protein function, Interproscan-5.27-66.0 (Zdobnov and Apweiler 2001) was  
113 employed to analyze proteins from MAKER with known functional domains and GO  
114 terms from the Pfam database. Then, the genes were filtered to remove those without  
115 domain content support or those with a quality metric (Annotation Edit Distance, AED)

116 greater than or equal to 1 (Eilbeck, et al. 2009).

117

118 To assess annotation quality, two summary statistics were considered: the percentage  
119 of the genes with an AED value less than 0.5, and the percentage of the genes with  
120 recognizable domain content. The gene set from annotation was also assessed using  
121 BUSCO v3 (Simão, et al. 2015), which was performed on the protein sets from  
122 MAKER with 4915 Benchmarking Universal Single-Copy Orthologs from 40 avian  
123 lineages (aves\_odb9 dataset).

124

### 125 **Read mapping**

126 Cleaned reads in all the fragment libraries for each individual were mapped to the *C.*  
127 *mantchuricum* reference genome produced in this project and a complete mitochondrial  
128 genome that was downloaded from the GenBank database (accession number:  
129 KP259807) with a Burrows–Wheeler alignment-maximal exact matches (BWA-MEM,  
130 v0.7.9a) algorithm (Li and Durbin 2009). Samtools v1.3.1 was used to calculate the per-  
131 base sequence depth, and was then used to calculate the mean coverage for each  
132 scaffold (Li, et al. 2009). Sorting and marking of duplicate sequences and generation of  
133 alignment metrics were performed with Picard Tools v2.8.0  
134 (<https://broadinstitute.github.io/picard/>).

135

136 Local realignment around indels and recalibration of base quality scores was performed  
137 using the Genome Analysis Toolkit v3.7 (GATK) pipeline according to the GATK best  
138 practice recommendations (McKenna, et al. 2010). To obtain a database of known  
139 polymorphic sites for realignment and recalibration, the raw variants were called in  
140 three programs: FreeBayes v0.9.20 (Garrison and Marth 2012), which required at least  
141 five supporting observations to consider a variant, the GATK UnifiedGenotyper tool  
142 that set the minimum phred-scaled quality score threshold to 50, and samtools mpileup  
143 v1.3.1 with default parameters (Li, et al. 2009). The genotypes identified by all three  
144 approaches were extracted with bcftools v1.2 (Li, et al. 2009) and used as a database of

145 known genotypes for realignment and recalibration. To obtain convergence between the  
146 average reported quality scores and empirical quality scores, this process was repeated  
147 four times.

148

#### 149 **Identification of sex chromosomes and mitochondrial genome-linked scaffolds**

150 We employed two criteria to identify scaffolds belonging to either the sex chromosomes  
151 or the mitochondrial genome. For one, we used the proportion of the chicken (*Gallus*  
152 *gallus*) sex chromosome and mitochondrial orthologous genes on each scaffold. We  
153 employed the tblastn and blastp functions with an e-value of  $1 \times 10^{-5}$  in BLAST+ v2.2.28  
154 (Camacho, et al. 2009) to search for the one-to-one orthologous genes of *G. gallus* and  
155 *C. mantchuricum*. The sex chromosomes and mitochondrial protein sequences of *G.*  
156 *gallus* were downloaded from Ensembl Release 87 ([ftp://ftp.ensembl.org/pub/release-](ftp://ftp.ensembl.org/pub/release-87/)  
157 [87/](ftp://ftp.ensembl.org/pub/release-87/)). We used in-house scripts to calculate the proportion of orthologous genes on each  
158 scaffold. For the second criterion, we used the ratio of scaffold coverage between males  
159 and females. We calculated the per-scaffold ratio of sequence coverage between males  
160 and females, which is expected to be equal to 1 on autosomes and 2 on Z-linked  
161 scaffolds. Considering the coverage bias, we assumed that scaffolds with a ratio  
162 between 1.6 and 2.4 belong to the Z chromosome. Based on this coverage ratio criteria,  
163 we assumed that the scaffolds that have equal to or more than 25% orthologous sex and  
164 mitochondrial genes are sex chromosomes and mitochondrial genome-linked scaffolds.  
165 Because we mapped the re-sequencing reads to a complete sequence of *Crossoptilon*  
166 *crossoptilon* mitochondrion DNA, we excluded all mitochondrial genome-linked  
167 scaffolds and SNPs in the downstream analyses.

168

169 For visualization and downstream analysis purposes, all autosome-linked scaffolds  
170 were ordered based on their alignment to autosomes in the *G. gallus* genome  
171 ([ftp://ftp.ensembl.org/pub/release-87/fasta/gallus\\_gallus/dna/](ftp://ftp.ensembl.org/pub/release-87/fasta/gallus_gallus/dna/)). All autosome-linked  
172 scaffolds were aligned to each *G. gallus* autosome using the PROmer function in the  
173 MUMmer V 3.23 package (Kurtz, et al. 2004). After alignment, we merged all Delta

174 files together and filtered the results with the following criteria: retain the longest  
175 consistent alignment, minimum alignment identity is 50, and minimum alignment  
176 length is 500. After filtering, we determined the location of each scaffold based on the  
177 position of the longest alignment.

178

### 179 **SNP calling**

180 After realignment and recalibration, sites with a phred-scaled confidence  $\geq 30$  were  
181 used to perform joint genotyping with the GATK HaplotypeCaller and  
182 GenotypeGVCFs tool. Raw variant sets on autosomes, the Z-chromosome, and the  
183 mitochondrial genome were generated separately based on our designation scaffolds.  
184 The quality metrics of each raw variant were extracted with vcftools v0.1.14 (Danecek,  
185 et al. 2011) and plotted on the density curve of each parameter in RStudio. The  
186 distribution of each parameter was used to set the filtering criteria based on the  
187 suggestion of the GATK best practices. Based on the distribution of each parameter,  
188 quality filtering of the raw variants on autosomes was performed with the following  
189 criteria to maintain high-quality SNPs: minor allele frequency  $> 0.05$ , strand odds ratio  
190  $< 3$ , quality by depth  $> 2$ , Fisher Strand  $< 60$ , RMS mapping quality  $> 50$ , mapping  
191 quality rank sum  $> -4$ , read position rank sum  $> -2$ , minimum depth (summing all 51  
192 samples)  $> 870$ , and maximum depth (summing all 51 samples)  $< 1304$ ; explanation of  
193 these parameters can be found in the GATK user manual (McKenna, et al. 2010). These  
194 high-quality variants were used in the analyses performed in this study. Variants on the  
195 Z chromosome were filtered using the same quality thresholds as above, except that the  
196 minimum and maximum depths were 545 and 1207. Considering the huge amount of  
197 mitochondrial DNA in cells, we set the minimum depth to 966 for filtering the raw  
198 variants. The percentage of missing SNPs in each individual was calculated using  
199 vcftools v0.1.14 (Danecek, et al. 2011).

200

### 201 **Inference of kinship**

202 In population genetic analyses, it is often necessary to exclude closely related

203 individuals. The three populations of *C. mantchuricum* are all small isolated wild  
204 populations where individuals may have familial relationships. We estimated the  
205 relatedness of all samples in each population using KING v 2.1.3 (Manichaikul, et al.  
206 2010) to estimate the kinship coefficient using our library of autosomal SNPs with no  
207 missing sites. Pairs with a kinship coefficient  $> 0.177$  (twins and first-degree  
208 relationship) were not included in subsequent analyses. There were 14 samples with  
209 close (duplicate/twins, first degree) relationships to other individuals in the data. These  
210 samples were removed, leading to a total of 37 samples that were retained in  
211 downstream analyses (Fig. S13; Dataset S10).

212

### 213 **Phylogenetic inference and the mitochondrial haplotype network**

214 Phylogenetic relationships were inferred separately using a maximum-likelihood (ML)  
215 approach with autosomes, the Z chromosome, and mitochondrial SNP data. Aligned  
216 autosome sequences were generated from the SNP library using the SNPhylo pipeline  
217 with the filtering criteria of a linkage disequilibrium coefficient ( $R^2 < 0.2$ ) and no  
218 missing sites (Lee, et al. 2014). After filtering with SNPhylo, 2,274,011 autosome SNPs  
219 were used to infer phylogenetic relationships. Sequences for the Z chromosome and  
220 mitochondria were generated with in-house scripts and aligned in the Mafft v 7.271  
221 program (Yamada, et al. 2016). The phylogenetic trees were constructed in PhyML v  
222 3.0 (Guindon, et al. 2010) with 1000 bootstrap replicates for autosomes, the Z  
223 chromosome, and mitochondrial sequences. Nucleotide frequencies, the  
224 transition/transversion ratio, and the value of the gamma shape parameter were  
225 estimated by ML. Tree topology, branch length, and substitution rate parameters were  
226 optimized in this program. The median joining haplotype network of mitochondria was  
227 constructed using Popart (Leigh and Bryant 2015).

228

### 229 **Population structure and principal component analysis**

230 Principal component analysis (PCA) of the genotypes from 37 individuals was  
231 performed using a stringently filtered set of 49,701 autosomal SNPs (no missing sites,



232 Hardy-Weinberg equilibrium exact test  $p$ -value  $> 0.00001$ , linkage disequilibrium  
233 coefficient,  $r^2 < 0.2$ ) in the Genome-wide Complex Trait Analysis (GCTA) v 1.91.3  
234 (Yang, et al. 2011). Using the same SNP set, population structure was inferred using  
235 ADMIXTURE v 1.3.0 (Alexander, et al. 2009) with cross-validation (CV) (Alexander  
236 and Lange 2011) and 100 bootstraps. This approach estimates the ancestry proportion  
237 of each sample based on SNP data, given the *a priori* specification of  $K$  ancestral  
238 populations. To test the stability of the results, we performed the analysis using all 37  
239 samples, and subsets of individuals belonging to the putative populations *C.*  
240 *mantchuricum*: Blue, Brown-W, Brown-C, Brown-E. We predefined the  $K$  value from  
241 1 to 10 for all individuals (including *C. auritum* and *C. mantchuricum*), and from 1 to  
242 6 within *C. mantchuricum*. For the isolated populations (Blue, Brown-W, Brown-C, and  
243 Brown-E), we predefined the  $K$  value from 1 to 3. For each  $K$  value, the analysis was  
244 performed ten times with different random seeds, which aimed to obtain the most stable  
245 results.

246

#### 247 **Estimation of genetic diversity**

248 To assess the genetic diversity within and among *C. mantchuricum* populations, we  
249 calculated the heterozygosity of each sample, defined as the proportion of heterozygous  
250 sites in all callable sites across the autosomes. For each population or species, we  
251 defined the genetic diversity as the mean heterozygosity per individual within each  
252 population or species. We compared the diversity estimates of the two species to 21  
253 other avian species for which comparable estimates were available, some of which are  
254 also highly inbred, such as White tailed eagle (*Haliaeetus albicilla*), Bald eagle  
255 (*Haliaeetus leucocephalus*), Crested ibis (*Nipponia nippon*), and Dalmatian pelican  
256 (*Pelecanus crispus*).

257

258 We also computed population genetic statistics including pairwise nucleotide diversity  
259 ( $\theta_\pi$ ) and Watterson's expected nucleotide diversity ( $\theta_w$ ) on both synonymous (four-fold  
260 degenerate sites) and non-synonymous sites (zero-fold degenerate sites). These

261 summary statistics were calculated based on the site frequency spectrum (SFS) with in-  
262 house scripts. In both the synonymous and non-synonymous sites, low-quality and  
263 missing genotypes were inferred separately for each population using the program  
264 BEAGLE v 4.1 (Browning and Browning 2016). To test whether *C. mantchuricum* has  
265 accumulated more missense mutations than *C. auritum*, we computed  $\Theta_{\pi}$  (zero-fold  
266 degenerate sites) /  $\Theta_{\pi}$  (four-fold degenerate sites) for each population. If the populations  
267 of *C. mantchuricum* have accumulated more missense mutations, then this value is  
268 expected to be higher in *C. mantchuricum* than that in *C. auritum*. To compare these  
269 summary statistics between populations, these statistics were calculated using 1,000  
270 bootstrap replicates (resampling with replacement). Because the variance of any  
271 summary statistics between two randomly selected populations was not homoscedastic,  
272 non-paired Welch two-sample t-tests were used to test whether the summary statistics  
273 of the two populations were significantly different from each other.

274

### 275 **Estimating inbreeding patterns**

276 Estimation of inbreeding using whole genome resequencing data has been shown to  
277 outperform estimates using extensive pedigree data (Kardos, et al. 2018). To understand  
278 the genomic extent of inbreeding in *C. mantchuricum*, we identified genome-wide  
279 patterns of runs of homozygosity (ROH), estimated linkage disequilibrium (LD), and  
280 the inbreeding coefficient ( $F_{is}$ ) in each of the three populations of *C. mantchuricum*.  
281 For comparison, we also performed the same analysis in the sampled population of *C.*  
282 *auritum*.

283

284 ROH arises through the process of inbreeding that gives offspring the opportunity to  
285 inherit identical haplotypes from each parent (Ceballos, et al. 2018). The location and  
286 number of ROHs were identified in each sample using plink v1.90 with default  
287 parameters (Howrigan, et al. 2011). Because meiosis can break down the segments that  
288 are identical-by-descent, we assume that longer ROH ( $\geq 0.5$  Mb) arose from recent  
289 inbreeding, and shorter ROH ( $< 0.5$  Mb) arose from more ancient inbreeding (Kirin, et

290 al. 2010). To compare the relative extents of recent and ancient inbreeding, the average  
291 fraction of the longer and shorter ROH on the autosomes was summarized for each  
292 population.

293

294 To avoid biases caused by the different sample sizes of the sampled populations in the  
295 LD analysis, we randomly selected six unrelated samples from each population and  
296 repeated this analysis 10 times. We employed Haploview (Barrett, et al. 2004) to  
297 calculate the correlation coefficient ( $R^2$ ) between any pair of SNPs in each population.  
298 The parameters were set as follows: -maxdistance 500 -dprime -minGeno 0.75 -  
299 minMAF 0.05 -hwcutoff 0.001. To plot the LD decay curves, we merged the SNPs that  
300 had a similar physical distance (1 kb) into one group and calculated the mean  $R^2$  for  
301 each group. We estimated the inbreeding coefficient per individual in plink v1.90  
302 (Howrigan, et al. 2011) and then calculated the average inbreeding coefficient for each  
303 population.

304

### 305 **Evaluating the genetic load**

306 Genetic load is a factor that can drive the extinction of small populations. Evaluating  
307 the genetic load of endangered species is an important component of conservation  
308 genetics. Thus, we sought to gauge the genetic load of *C. mantchuricum* using  
309 population genomic data. We estimated the relative excess of derived loss-of-function  
310 (LOF) and missense variants in three populations of *C. mantchuricum* compared to  
311 those of *C. auritum* to test whether these isolated populations experience inbreeding  
312 depression.

313

314 To measure the genetic load, we employed methods previously used for gorillas (Xue,  
315 et al. 2015). We used SnpEff to identify LOF, missense, and synonymous variations in  
316 the coding region (Cingolani, et al. 2012). We inferred the ancestral and derived allele  
317 at each location based on comparison to the genome of their close relatives, the White  
318 eared pheasant (*C. crossoptilon*) (Wang, et al. 2018). In order to estimate the relative

319 number of derived LOF and missense alleles found in each population of *C.*  
 320 *mantchuricum* compared to those in *C. auritum*, we used the following formula to  
 321 calculate the number of derived LOF or missense alleles found in population *A* rather  
 322 than in population *B*:

$$323 \quad L_{A,B}(C) = \frac{\sum_{i \in C} f^{A_i}(1 - f^{B_i})}{\sum_{j \in I} f^{A_j}(1 - f^{B_j})}$$

324 We used  $f^{A_i} = d^{A_i} / n^{A_i}$  to calculate the observed derived allele frequency in population  
 325 *A*, where  $d^{A_i}$  is the number of derived alleles in population *A*, and  $n^{A_i}$  is the total number  
 326 of alleles in population *A*. In population *B*,  $f^{B_i}$  was similarly defined. We defined *C* as  
 327 a set of protein-coding sites, and *I* as a set of intergenic sites. For each comparison, the  
 328 relative number of derived LOF or missense variations was measured by  $R_{A/B}(C) =$   
 329  $L_{A,B}(C)/L_{B,A}(C)$ . If the  $R_{A/B}(C)$  is larger than one, it means that the *A* population has  
 330 more LOF or missense mutations than the *B* population; otherwise, the *B* population  
 331 has excess corresponding mutations. To estimate the variance of  $R_{A/B}(C)$ , we performed  
 332 a 100-block jackknife at the sites of the *C* set.

333

334 To evaluate inbreeding depression, we used three strategies to analyze the outcome of  
 335 inbreeding. We first calculated whether the ROH regions accumulated much more  
 336 homozygous missense mutations than those outside the ROH regions. If the  
 337 homozygous lethal variations did not come from inbreeding, we expected the ratio of  
 338 the number of homozygous missense genotypes to the number of homozygous  
 339 synonymous genotypes to be equal to one; otherwise, the ratio should be less than one.  
 340 Next, we tested whether there were more heterozygous missense mutations compared  
 341 to the number of homozygous mutations. If one population accumulates homozygous  
 342 lethal mutations, the ratio of the number of missense alleles to the number of  
 343 synonymous alleles in the homozygous sites would be significantly less than the ratio  
 344 in the heterozygous sites. To test whether there was a significant difference between the  
 345 homozygous and heterozygous sites, we employed the Kolmogorov-Smirnov test to  
 346 compare the distribution. For the third strategy, we compared the genetic diversity of

347 the functional region (MHC, conserved non-exonic elements, conserved intron,  
348 conserved intergenic region, and coding region) and non-functional region (putative  
349 non-functional region, non-conserved intron, and non-conserved intergenic region)  
350 between each population of *C. mantchuricum* and *C. auritum*. If *C. mantchuricum*  
351 experienced inbreeding depression, both the functional and non-functional regions  
352 would have a lower genetic diversity than that of *C. auritum*.

353

354 To identify the conserved non-exonic elements (CNEE), putative non-function region,  
355 conserved and non-conserved introns, and conserved and non-conserved intergenic  
356 regions, we followed the method described in a comparative genomics project on  
357 paleognaths (Sackton, et al. 2019) to identify the *G. gallus* (galGal5) CNEE coordinates.  
358 After getting the information regarding the *G. gallus* CNEE coordinates, we aligned the  
359 scaffolds of *C. mantchuricum* to the *G. gallus* genome in LAST software (Kiełbasa, et  
360 al. 2011). To obtain the CNEE coordinates of *C. mantchuricum*, we lifted the *G. gallus*  
361 CNEE coordinates to *C. mantchuricum*. We defined the putative non-functional region  
362 as the region far away from the genes, with CNEE regions at least 50 kb and at least 1  
363 kb in length. The conserved intron and conserved intergenic region are defined as the  
364 regions with overlap between CNEE and the intron and intergenic regions, respectively.  
365 Otherwise, the regions that do not have any overlap are considered non-conserved  
366 introns and non-conserved intergenic regions.

367

368 As an additional assessment of the fitness of *C. mantchuricum*, we calculated the  
369 genetic diversity in the MHC region. We identified the MHC region with the most  
370 effective reciprocal hit BLAST method. By comparing the protein sequences of *C.*  
371 *mantchuricum* and *G. gallus*, the ortholog genes were identified. Using the annotation  
372 information of *G. gallus*, the ortholog MHC region was identified. With the in-house  
373 scripts, we calculated the genetic diversity of the MHC.

374

375 In order to more intuitively understand whether purifying selection could remove

376 deleterious mutations in *C. mantchuricum*, we investigated whether or not derived  
377 missense mutations in potential adaptive genes are deleterious. Because the genomic  
378 islands identified by the statistic  $F_{ST}$  may occur due to reduced diversity (Cruickshank  
379 and Hahn 2014), and *C. mantchuricum* typically has low genome-wide diversity, we  
380 employed  $d_{XY}$ , a statistic that is independent of the genetic diversity within the  
381 populations, to identify the candidate adaptive genes (Cruickshank and Hahn 2014). We  
382 also used  $\pi$ , a measure of genetic variation, to infer the candidate adaptive genes. We  
383 first employed “popgenWindows.py” written by Simon Martin at The University of  
384 Edinburgh, UK, to calculate the  $d_{XY}$  between *C. auritum* and each population of *C.*  
385 *mantchuricum*. The measure of genetic variation,  $\pi$ , was also calculated using this  
386 script. We set the window size to 100 kb, and the minimum number of sites within a  
387 window was 10. The size of the step for the sliding window was set to 25 kb. The  
388 window size was determined by the results of the linkage disequilibrium test. Then, we  
389 Z-transformed the  $d_{XY}$  and  $\pi$  to  $Zd_{XY}$  and  $Z\pi$ . Because there was almost no genetic  
390 diversity in *C. mantchuricum*, we only employed the  $Z\pi$  of *C. auritum* and  $Zd_{XY}$  to  
391 infer the candidate adaptive genes. The windows with high (top 5%)  $Zd_{XY}$  and  
392 extremum (both top 5% and bottom 5%) of  $Z\pi$  were determined as the candidate  
393 regions containing the genes under selection. Genes with more than 50% of their length  
394 contained within the candidate regions were selected as the genes putatively under  
395 positive selection. PROVEAN v 1.1.5 (Choi, et al. 2012) was used to predict whether  
396 the derived missense mutations in the genes putatively under positive selection were  
397 deleterious mutations. The derived missense mutations with PROVEAN scores lower  
398 than -2.5 were identified as deleterious mutations. The genetic diversity of each  
399 potential adaptive gene and the frequency of the derived missense mutations were also  
400 calculated. KOBAS v 3.0 (Wu, et al. 2006) was used to perform KEGG and GO  
401 enrichment analyses for these genes putatively under positive selection.

402

### 403 **Demographic History Reconstruction**

404 To explore the potential historical factors that are linked to low present-day genetic

405 diversity, we used the Multiple Sequential Markovian Coalescence (MSMC2) model  
406 (Schiffels and Durbin 2014) to reconstruct demographic histories for each of our study  
407 populations. Because MSMC2 uses phased haplotypes as input data, we used SHAPEIT  
408 v2.904.3.10.0 (Delaneau, et al. 2012) to phase 33 scaffolds separately, with a minimum  
409 length of 132 kb. Based on the results from MUMmer, we selected at least one scaffold  
410 from each chromosome. The total length of these 33 scaffolds covered 18.48% of the  
411 draft genome. To prepare the input file, we followed the procedure of Heng Li's  
412 SNPable program (<http://lh3lh3.users.sourceforge.net/snpable.shtml>) to generate  
413 Mappability mask files for each scaffold. Under the general guidelines of MSMC2  
414 (<https://github.com/stschiff/msmc/blob/master/guide.md>), we ran MSMC2 and  
415 calculated the effective population size ( $N_e$ ) of *C. mantchuricum*. To test the  
416 convergence of the result, we performed both analyses with 100 bootstrap replicates.  
417 Based on the comparison of the four-fold degenerate sites among the lineages of  
418 Galliformes, we set the mutation rate of *C. mantchuricum* as  $4.02 \times 10^{-9}$  per site per  
419 generation (Zhang, et al. 2014), and the generation time as 2 years per generation  
420 (Zheng 2015).

421

422 We used Migrate-n v 3.6.11 (Beerli and Felsenstein 2001) to investigate whether gene  
423 flow occurs between adjacent populations of *C. mantchuricum*. We evaluated four  
424 possible gene flow patterns among the three populations of *C. mantchuricum*: migration  
425 between adjacent populations, migration between Brown-C and Brown-W, migration  
426 between Brown-C and Brown-E, or no gene flow between adjacent populations. The  
427 best-fit model was inferred by the maximum likelihood in the Migrate-n. To prepare the  
428 input data for Migrate-n, we first selected the putative non-functional regions whose  
429 lengths were longer than 1 kb and then randomly selected 1 kb from each of these  
430 putative non-functional regions. Among the selected 1 kb putative non-functional  
431 regions, we randomly selected 30 regions to create the bed file. In the vcftools software,  
432 we extracted the phased vcf file for each bed and then employed the bcftools software  
433 to produce sequences for each region of each sample. Using the 60 sequences of each

434 sample, we performed Migrate-n to estimate the gene flow patterns.  
435  
436 In order to distinguish whether the populations experienced continuous population  
437 decline or consistent small population size in *C. mantchuricum*, we employed  
438 fastsimcoal26 (Excoffier, et al. 2013), a simulation-based framework, to infer the  
439 demographic history of the three populations of *C. mantchuricum*. Fastsimcoal26 uses  
440 SFS information to infer the most suitable evolutionary model given a range of  
441 scenarios. Using this method, we also tested whether *C. mantchuricum* experienced  
442 inbreeding and whether there was gene flow among the adjacent populations of *C.*  
443 *mantchuricum*. The three-dimensional SFS of the three populations of *C. mantchuricum*  
444 was estimated using the -doSaf and -realSFS methods in ANGSD (Korneliussen, et al.  
445 2014). To minimize misidentification of the derived allele in *C. mantchuricum*, we only  
446 selected the sites whose alleles were fixed in the population of *C. auritum*, and excluded  
447 the sites that were not located in the putative non-functional region and were not present  
448 in all individuals within each population. We first estimated the unfolded one-  
449 dimensional SFS for each of the *C. mantchuricum* populations. We then estimated the  
450 three-dimensional SFS among the three populations. The three-dimensional SFS was  
451 used to estimate the composite likelihoods of the different evolutionary models.  
452 Because we wanted to test 1) whether *C. mantchuricum* experienced long-term  
453 population decline (D) or consistent small population size (S), 2) whether there was  
454 gene flow between the adjacent populations of *C. mantchuricum* (no gene flow between  
455 adjacent populations: I; gene flow occurred between adjacent populations: WCE; gene  
456 flow occurred between the Western and Central populations: CW; gene flow occurred  
457 between the Central and Eastern populations: CE), and 3) whether there had been  
458 inbreeding (IN) in the populations of *C. mantchuricum*, we devised 16 historical models  
459 for the three populations. The 16 models were as follows: a) S+I; b) S+WCE; c) S+CW;  
460 d) S+CE; e) D+I; f) D+WCE; g) D+CW; h) D+CE; i) S+I+IN; j) S+WCE+IN; k)  
461 S+CW+IN; l) S+CE+IN; m) D+I+IN; n) D+WCE+IN; o) D+CW+IN; and p) D+CE+IN  
462 (these models are illustrated in Fig. S11). For each model, we performed 1,000,000



463 simulations to estimate the expected derived SFS, and 100 expectation conditional  
464 maximization cycles were performed. We also required the minimum console output  
465 and set the minimum observed SFS entry count as 20 accounting for parameter  
466 estimation. The multiSFS and infinite site options were also used for estimating the  
467 model parameters. To obtain the global maximum likelihood for each model, the above  
468 procedure was replicated 100 times. To infer the best-fit model, the replicate with the  
469 highest estimated likelihood was used to calculate the AIC values and Akaike weights  
470 (w).

471

## 472 **Results**

### 473 **Mapping and SNP quality**

474 The sequencing coverage of the re-sequence individuals varied from 13.4 to 43.2 (the  
475 average coverage was 19.0), and the mapping rate varied from 83.6% to 98.9% (the  
476 average mapping rate was 97.3%) (Dataset S9).

477

478 The average proportion of high-quality bases (the call quality of the bases was Q20 or  
479 higher) in the BAM files was 93.30% (varied from 90.20% to 95.00%), 93.28% (varied  
480 from 89.07% to 95.27%), and 95.46% (varied from 95.24% to 95.75%) of the  
481 autosomes, Z chromosome, and mitochondria, respectively (Fig. S14a, Fig. S15a, Fig.  
482 S16a, Dataset S11). This proportion was defined as the number of high-quality bases  
483 divided by the number of aligned bases in the BAM file. In the BAM files of the  
484 autosomes, Z chromosome, and mitochondrial genome, the average percentage of sites  
485 covered by at least five reads was 97.58% (varied from 83.37% to 98.56%), 88.83%  
486 (varied from 45.00% to 98.44%) and 100% (no variation), respectively (Fig. S14b, Fig.  
487 S15b, Fig. S16b, Dataset S11).

488

489 After variant calling, we obtained 7,556,341 and 65 single-nucleotide variants for the  
490 genome (including autosomes and sex chromosomes) and mitochondria, respectively.  
491 After hard-filtering, the final SNP library contained 2,327,376 and 134,081 variable

492 sites on the autosome and Z chromosome, respectively. In the mtDNA dataset, we  
493 retained 24 substitution sites. In the autosome, Z chromosome, and mitochondrial SNP  
494 library, the mean proportion of missing SNPs was 0.047% (varied from 0.006% to  
495 0.372%), 0.392% (varied from 0.003% to 4.144%), and 0 (no variation), respectively  
496 (Fig. S14c, Fig. S15c, Fig. S16c, Dataset S11).

497

498 The average number of heterozygous sites of the autosomes and Z chromosome was  
499 230,681 (varied from 38,525 to 902,604) and 10,764 (varied from 808 to 28,595),  
500 respectively (Fig. S17, Fig. S18). In the autosome SNP library, *C. auritum* had the  
501 highest heterozygosity (average= 0.083%, SD = 0.0055%). Among the three  
502 populations of *C. mantchuricum*, Brown-C had the highest heterozygosity (average=  
503 0.014%, SD= 0.001%), while both Brown-W and Brown-E had similar heterozygosity  
504 (Fig. S14d). On the Z chromosomes, *C. auritum* had the highest genetic diversity  
505 (average= 0.029%, SD= 0.007%), but the three populations of *C. mantchuricum* had  
506 similar genetic diversity (Fig. S15d). For the mitochondria, the Brown-C and Brown-E  
507 populations had a low average number of nucleotide differences (the value was 0) (Fig.  
508 S16d).

509

#### 510 **Scaffolds linked to the Z chromosome and mitogenome**

511 We identified 49 Z chromosome-linked scaffolds (Dataset S12), which had 71.05 Mb  
512 bases with a scaffold N50 of 2432.56 kb. The length of the Z chromosome of *C.*  
513 *mantchuricum* was similar to that of *G. gallus* (82.53 Mb) (Consortium 2004). The  
514 distribution of single-base sequencing depths across all individuals showed two peaks  
515 for all scaffolds, but there was one single peak for the scaffolds designated as autosome-  
516 linked, indicating that the Z-linked scaffolds had effectively been removed from this  
517 set (Fig. S19). Female individuals had lower sequencing coverage on the Z  
518 chromosome compared to that of the male individuals, while the female and male  
519 individuals had similar sequencing coverage of the autosomes (Fig. S20). All the  
520 evidence indicated that the process of identifying and removing Z-linked scaffolds was

521 effective.

522

523 Interestingly, the W-chromosome did not appear in this assembly, even though the  
524 individual used to generate the *de novo* assembly was a female. This may be due to the  
525 typical characteristics of the avian W chromosomes, such as they tend to be highly  
526 heterochromatic and degenerated (Zhou, et al. 2014; Peichel 2017). We identified 3  
527 scaffolds that are on the mitochondrial genome (Dataset S12), which have 5,875 bp.

528

### 529 **References**

530 Alexander DH, Lange K. 2011. Enhancements to the ADMIXTURE algorithm for individual ancestry  
531 estimation. BMC Bioinformatics 12:246.

532 Alexander DH, Novembre J, Lange K. 2009. Fast model-based estimation of ancestry in unrelated  
533 individuals. Genome Research 19:1655-1664.

534 Bao W, Kojima KK, Kohany O. 2015. Repbase update, a database of repetitive elements in  
535 eukaryotic genomes. Mobile DNA 6:11.

536 Barrett JC, Fry B, Maller J, Daly MJ. 2004. Haploview: analysis and visualization of LD and haplotype  
537 maps. Bioinformatics 21:263-265.

538 Beerli P, Felsenstein J. 2001. Maximum likelihood estimation of a migration matrix and effective  
539 population sizes in n subpopulations by using a coalescent approach. Proceedings of the National  
540 Academy of Sciences 98:4563-4568.

541 Benson G. 1999. Tandem repeats finder: a program to analyze DNA sequences. Nucleic Acids  
542 Research 27:573-580.

543 Browning Brian L, Browning Sharon R. 2016. Genotype imputation with millions of reference  
544 samples. The American Journal of Human Genetics 98:116-126.

545 Butler J, MacCallum I, Kleber M, Shlyakhter IA, Belmonte MK, Lander ES, Nusbaum C, Jaffe DB.  
546 2008. ALLPATHS: De novo assembly of whole-genome shotgun microreads. Genome Research  
547 18:810-820.

548 Camacho C, Coulouris G, Avagyan V, Ma N, Papadopoulos J, Bealer K, Madden TL. 2009. BLAST  
549 plus: architecture and applications. BMC Bioinformatics 10:421.

550 Ceballos FC, Joshi PK, Clark DW, Ramsay M, Wilson JF. 2018. Runs of homozygosity: windows into  
551 population history and trait architecture. Nature Reviews Genetics 19:220-234.

552 Choi Y, Sims GE, Murphy S, Miller JR, Chan AP. 2012. Predicting the functional effect of amino acid  
553 substitutions and indels. PLOS ONE 7:e46688.

554 Cingolani P, Platts A, Wang LL, Coon M, Nguyen T, Wang L, Land SJ, Lu X, Ruden DM. 2012. A  
555 program for annotating and predicting the effects of single nucleotide polymorphisms, SnpEff. Fly  
556 6:80-92.

557 Consortium ICGS. 2004. Sequence and comparative analysis of the chicken genome provide  
558 unique perspectives on vertebrate evolution. Nature 432:695-716.

559 Cruickshank TE, Hahn MW. 2014. Reanalysis suggests that genomic islands of speciation are due  
560 to reduced diversity, not reduced gene flow. Molecular ecology 23:3133-3157.

- 561 Danecek P, Auton A, Abecasis G, Albers CA, Banks E, DePristo MA, Handsaker RE, Lunter G, Marth  
562 GT, Sherry ST, et al. 2011. The variant call format and VCFtools. *Bioinformatics* 27:2156-2158.
- 563 Delaneau O, Marchini J, Zagury J-F. 2012. A linear complexity phasing method for thousands of  
564 genomes. *Nature Methods* 9:179-181.
- 565 Eilbeck K, Moore B, Holt C, Yandell M. 2009. Quantitative measures for the management and  
566 comparison of annotated genomes. *BMC Bioinformatics* 10:67.
- 567 Excoffier L, Dupanloup I, Huerta-Sánchez E, Sousa VC, Foll M. 2013. Robust demographic inference  
568 from genomic and SNP data. *PLOS Genetics* 9:e1003905.
- 569 Garrison E, Marth G. 2012. Haplotype-based variant detection from short-read sequencing. *arXiv*  
570 1207:3907.
- 571 Grabherr MG, Haas BJ, Yassour M, Levin JZ, Thompson DA, Amit I, Adiconis X, Fan L, Raychowdhury  
572 R, Zeng Q, et al. 2011. Full-length transcriptome assembly from RNA-Seq data without a reference  
573 genome. *Nature Biotechnology* 29:644-652.
- 574 Guindon S, Dufayard J-F, Lefort V, Anisimova M, Hordijk W, Gascuel O. 2010. New algorithms and  
575 methods to estimate maximum-likelihood phylogenies: assessing the performance of PhyML 3.0.  
576 *Systematic Biology* 59:307-321.
- 577 Howrigan DP, Simonson MA, Keller MC. 2011. Detecting autozygosity through runs of  
578 homozygosity: A comparison of three autozygosity detection algorithms. *BMC Genomics* 12:460.
- 579 Hubley R, Finn RD, Clements J, Eddy SR, Jones TA, Bao W, Smit AFA, Wheeler TJ. 2015. The Dfam  
580 database of repetitive DNA families. *Nucleic Acids Research* 44:D81-D89.
- 581 Kardos M, Åkesson M, Fountain T, Flagstad Ø, Liberg O, Olason P, Sand H, Wabakken P, Wikenros  
582 C, Ellegren H. 2018. Genomic consequences of intensive inbreeding in an isolated wolf population.  
583 *Nature Ecology & Evolution* 2:124-131.
- 584 Kiełbasa SM, Wan R, Sato K, Horton P, Frith MC. 2011. Adaptive seeds tame genomic sequence  
585 comparison. *Genome Research* 21:487-493.
- 586 Kirin M, McQuillan R, Franklin CS, Campbell H, McKeigue PM, Wilson JF. 2010. Genomic runs of  
587 homozygosity record population history and consanguinity. *PLOS ONE* 5:e13996.
- 588 Korf I. 2004. Gene finding in novel genomes. *BMC Bioinformatics* 5:59.
- 589 Korneliussen TS, Albrechtsen A, Nielsen R. 2014. ANGSD: Analysis of next generation sequencing  
590 data. *BMC Bioinformatics* 15:356.
- 591 Kurtz S, Phillippy A, Delcher AL, Smoot M, Shumway M, Antonescu C, Salzberg SL. 2004. Versatile  
592 and open software for comparing large genomes. *Genome Biology* 5:R12.
- 593 Lee T-H, Guo H, Wang X, Kim C, Paterson AH. 2014. SNPhylo: a pipeline to construct a  
594 phylogenetic tree from huge SNP data. *BMC Genomics* 15:162.
- 595 Leigh JW, Bryant D. 2015. Popart: full-feature software for haplotype network construction.  
596 *Methods in Ecology and Evolution* 6:1110-1116.
- 597 Li H, Durbin R. 2009. Fast and accurate short read alignment with Burrows-Wheeler transform.  
598 *Bioinformatics* 25:1754-1760.
- 599 Li H, Handsaker B, Wysoker A, Fennell T, Ruan J, Homer N, Marth G, Abecasis G, Durbin R,  
600 Subgroup GPDP. 2009. The sequence alignment/map format and SAMtools. *Bioinformatics*  
601 25:2078-2079.
- 602 Manichaikul A, Mychaleckyj JC, Rich SS, Daly K, Sale M, Chen W-M. 2010. Robust relationship  
603 inference in genome-wide association studies. *Bioinformatics* 26:2867-2873.
- 604 McKenna A, Hanna M, Banks E, Sivachenko A, Cibulskis K, Kernytsky A, Garimella K, Altshuler D,

- 605 Gabriel S, Daly M, et al. 2010. The Genome Analysis Toolkit: A MapReduce framework for analyzing  
606 next-generation DNA sequencing data. *Genome Research* 20:1297-1303.
- 607 Peichel CL. 2017. Convergence and divergence in sex-chromosome evolution. *Nature Genetics*  
608 49:321-322.
- 609 Sackton TB, Grayson P, Cloutier A, Hu Z, Liu JS, Wheeler NE, Gardner PP, Clarke JA, Baker AJ, Clamp  
610 M, et al. 2019. Convergent regulatory evolution and loss of flight in paleognathous birds. *Science*  
611 364:74-78.
- 612 Schiffels S, Durbin R. 2014. Inferring human population size and separation history from multiple  
613 genome sequences. *Nature Genetics* 46:919-925.
- 614 Simão FA, Waterhouse RM, Ioannidis P, Kriventseva EV, Zdobnov EM. 2015. BUSCO: assessing  
615 genome assembly and annotation completeness with single-copy orthologs. *Bioinformatics*  
616 31:3210-3212.
- 617 Stanke M, Waack S. 2003. Gene prediction with a hidden Markov model and a new intron  
618 submodel. *Bioinformatics* 19:ii215-ii225.
- 619 Wang P, Yao H, Gilbert KJ, Lu Q, Hao Y, Zhang Z, Wang N. 2018. Glaciation-based isolation  
620 contributed to speciation in a Palearctic alpine biodiversity hotspot: evidence from endemic  
621 species. *Molecular Phylogenetics and Evolution* 129:315-324.
- 622 Wu J, Mao X, Cai T, Luo J, Wei L. 2006. KOBAS server: a web-based platform for automated  
623 annotation and pathway identification. *Nucleic Acids Research* 34:W720-W724.
- 624 Xue Y, Prado-Martinez J, Sudmant PH, Narasimhan V, Ayub Q, Szpak M, Frandsen P, Chen Y,  
625 Yngvadottir B, Cooper DN, et al. 2015. Mountain gorilla genomes reveal the impact of long-term  
626 population decline and inbreeding. *Science* 348:242-245.
- 627 Yamada KD, Tomii K, Katoh K. 2016. Application of the MAFFT sequence alignment program to  
628 large data—reexamination of the usefulness of chained guide trees. *Bioinformatics* 32:3246-3251.
- 629 Yang J, Lee SH, Goddard ME, Visscher PM. 2011. GCTA: A tool for genome-wide complex trait  
630 analysis. *The American Journal of Human Genetics* 88:76-82.
- 631 Zdobnov EM, Apweiler R. 2001. InterProScan – an integration platform for the signature-  
632 recognition methods in InterPro. *Bioinformatics* 17:847-848.
- 633 Zhang G, Li C, Li Q, Li B, Larkin DM, Lee C, Storz JF, Antunes A, Greenwold MJ, Meredith RW, et al.  
634 2014. Comparative genomics reveals insights into avian genome evolution and adaptation.  
635 *Science* 346:1311-1320.
- 636 Zheng G-M. 2015. Pheasants in China. Beijing, China: Higher Education Press.
- 637 Zhou Q, Zhang J, Bachrog D, An N, Huang Q, Jarvis ED, Gilbert MTP, Zhang G. 2014. Complex  
638 evolutionary trajectories of sex chromosomes across bird taxa. *Science* 346:1246338.

639 **Figures**

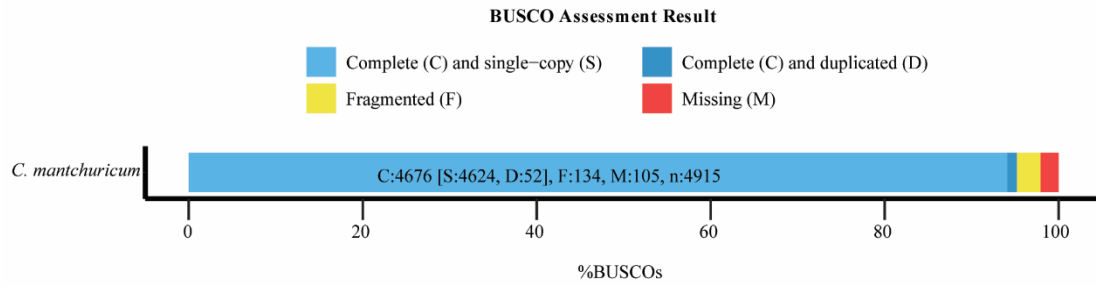

640

641 Fig. S1. Benchmarking Universal Single-Copy Orthologs (BUSCO) assessment Result.

642 The numbers after the letters indicate the amount of BUSCO groups of the

643 corresponding groups. n indicates the number of BUSCO groups in the avian dataset.

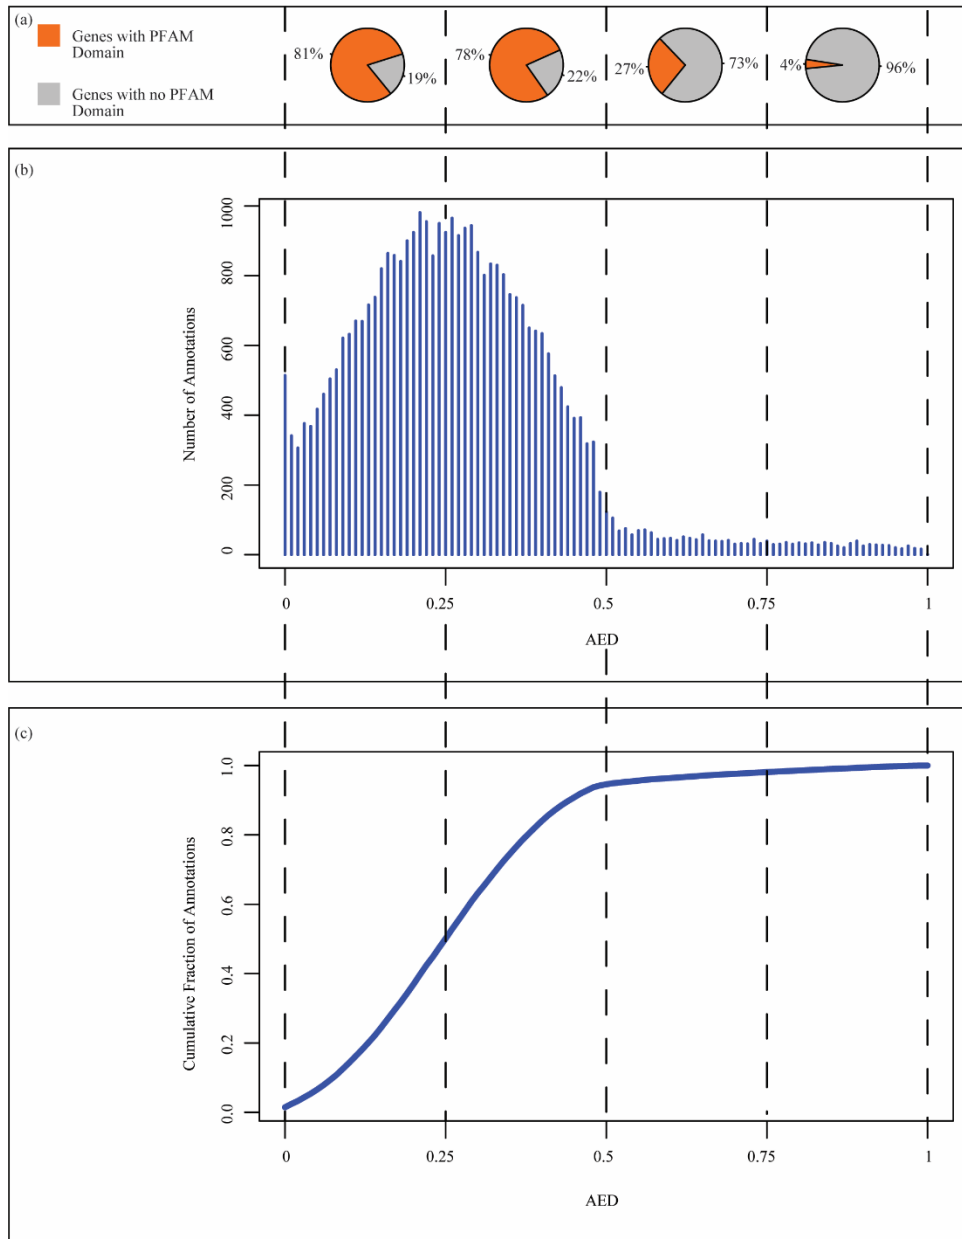

644

645 Fig. S2. Annotated gene set assessment result. AED means Annotation Edit Distance,  
 646 which is used to measure the suitability between the annotated gene model and the  
 647 supporting evidence of that model. AED is represented by a number between 0 and 1.  
 648 An AED value of 0 indicates the annotated gene model is perfectly supported by  
 649 available evidence, and an AED of 1 denotes that the annotated gene model is  
 650 completely lacks supportive evidence. (a) The pie charts represent the annotated gene  
 651 models with different AED values (0~0.25, 0.25~0.5, 0.5~0.75, and 0.75~1). (b) The  
 652 number of annotated gene models with different AED values from 0 to 1. (c) The curve  
 653 of the cumulative fraction of the annotated gene models.

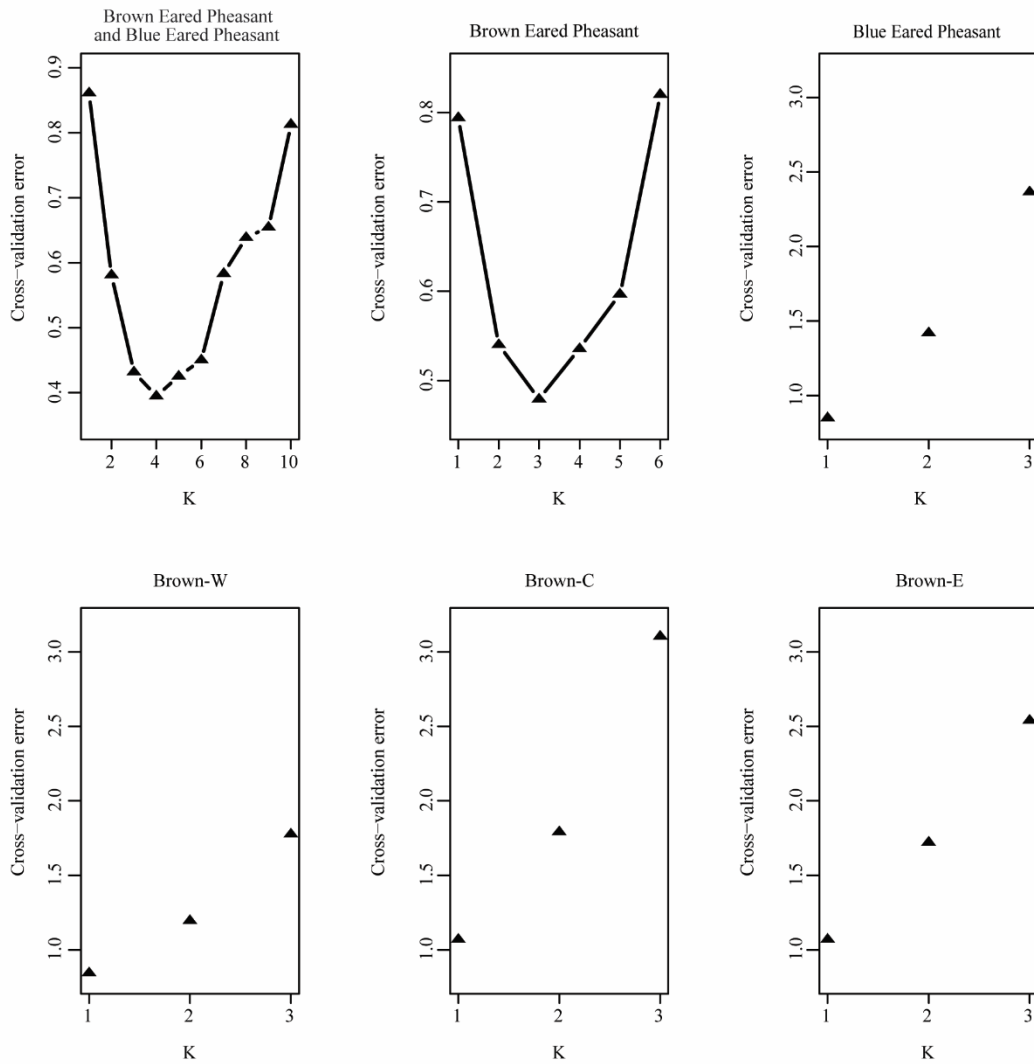

654

655 Fig. S3. Cross-validation (CV) values of different ancestral number (K) values. The CV  
 656 values from the ADMIXTURE analyses performed on the different population scales  
 657 with 10 independent runs with different random seeds.



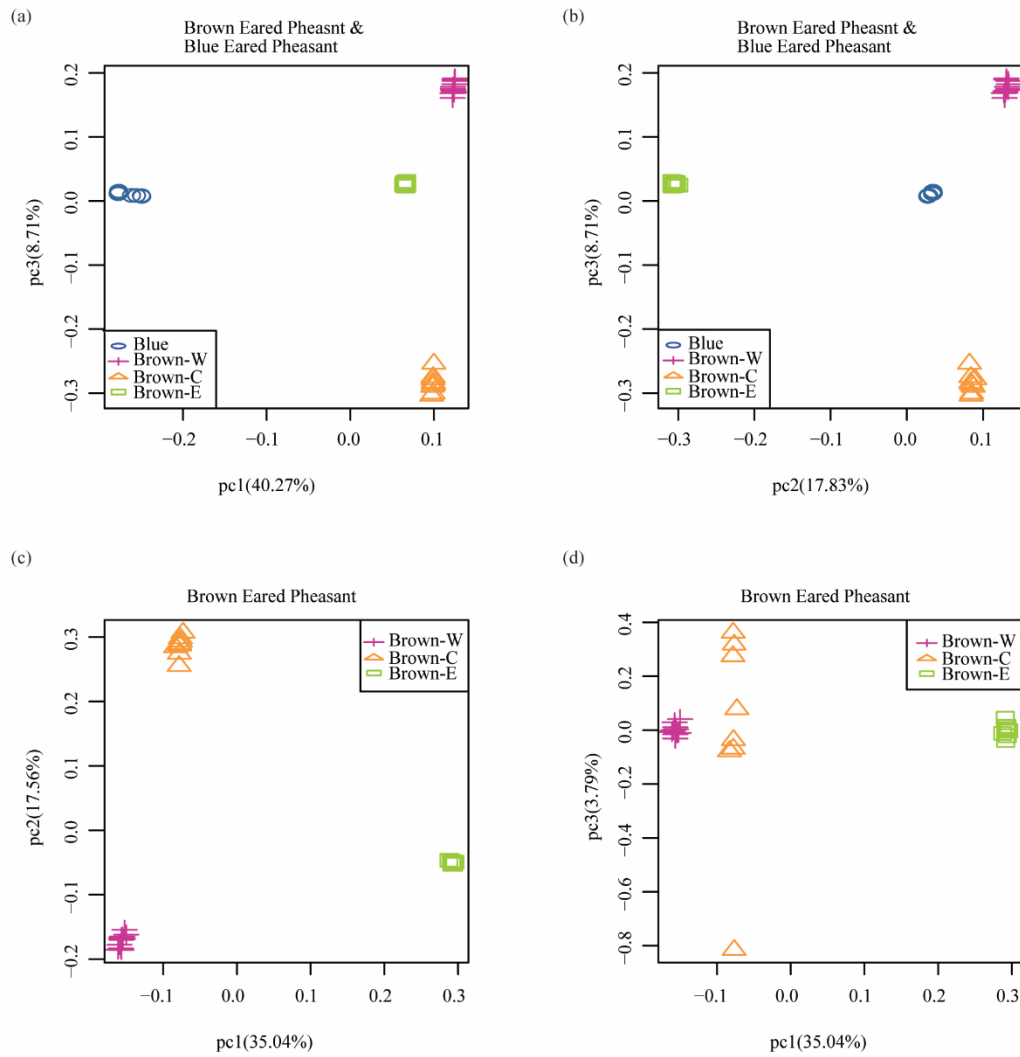

658

659 Fig. S4. Principal component analysis (PCA) of *Crossoptilon mantchuricum* and  
 660 *Crossoptilon auritum*. The numbers in brackets are the contribution values of the  
 661 corresponding eigenvectors.

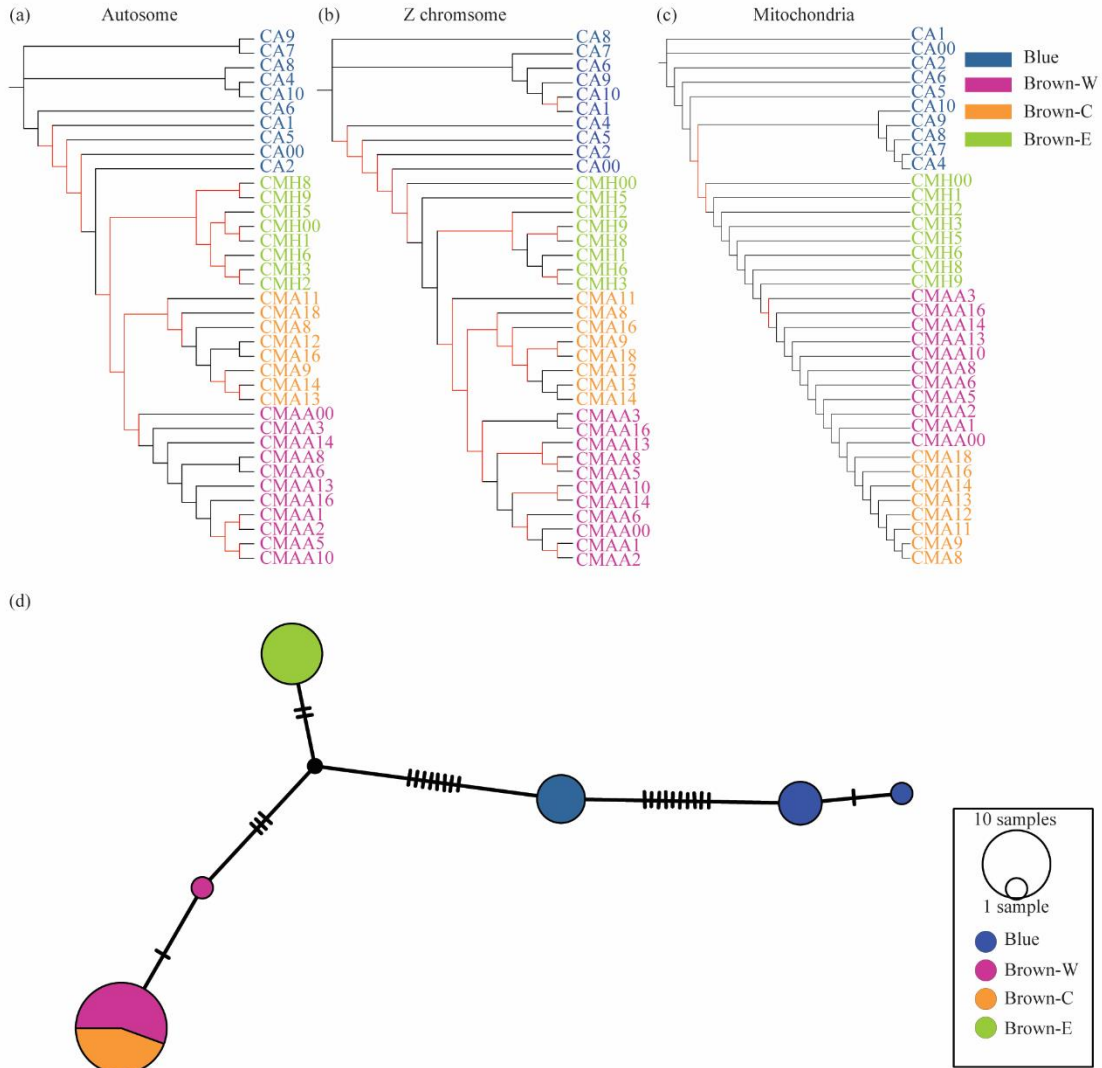

662  
 663 Fig. S5. Phylogenetic relationships and haplotype networks within *Crossoptilon*  
 664 *mantchuricum*. The colors represent sampling populations; blue represents  
 665 *Crossoptilon auritum* (Blue) as outgroups, while orange, green, and red represent the  
 666 Western (Brown-W), Central (Brown-C), and Eastern (Brown-E) populations of *C.*  
 667 *mantchuricum*, respectively. (a), (b), and (c) The unrooted maximum-likelihood (ML)  
 668 trees reconstructed using autosomes, the Z chromosome, and mitochondria,  
 669 respectively. The bootstrap values larger than 80% of the bootstrap number were  
 670 associated with the corresponding branches. (d) Median joining mitochondrial  
 671 haplotype network. Lines on the linking branches indicate single base variations, and  
 672 circle size represents the number of samples that share a single haplotype.

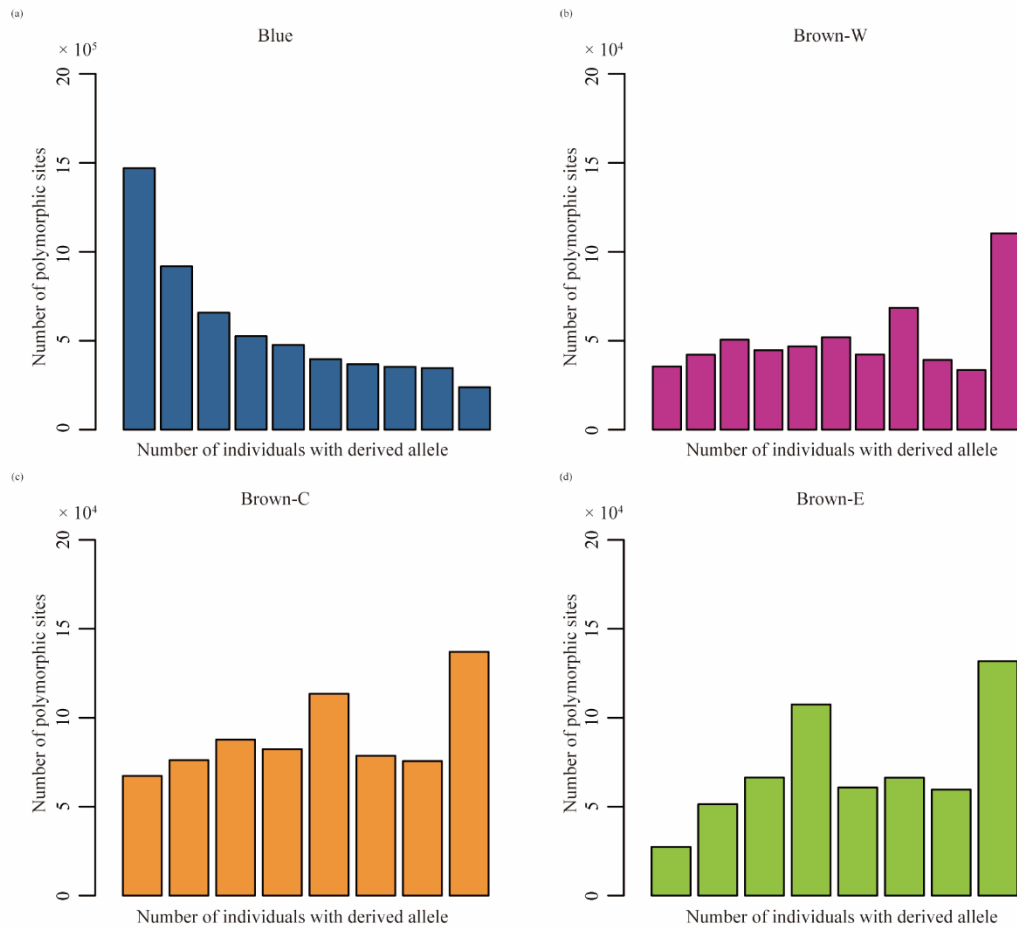

673

674 Fig. S6. Folded site frequency spectrum. (a) *C. auritum*. (b) Brown-W, the western  
 675 population of *C. mantchuricum*. (c) Brown-C, the central population of *C.*  
 676 *mantchuricum*. (d) Brown-E, the eastern population of *C. mantchuricum*.

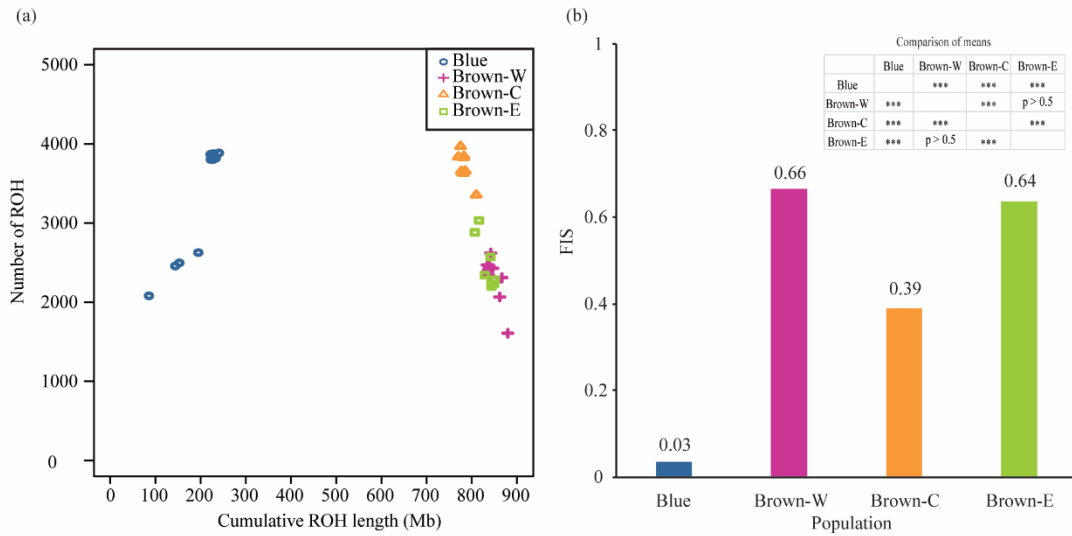

677

678 Fig. S7. Census of the Runs of Homozygosity (ROHs) and inbreeding coefficients ( $F_{IS}$ ).

679 (a) The cumulative ROH length against the total number of observed ROH segments

680 for each sample. (b) The mean inbreeding coefficient of each population. Three

681 asterisks indicate that the non-adjusted P values were less than  $10^{-3}$ .

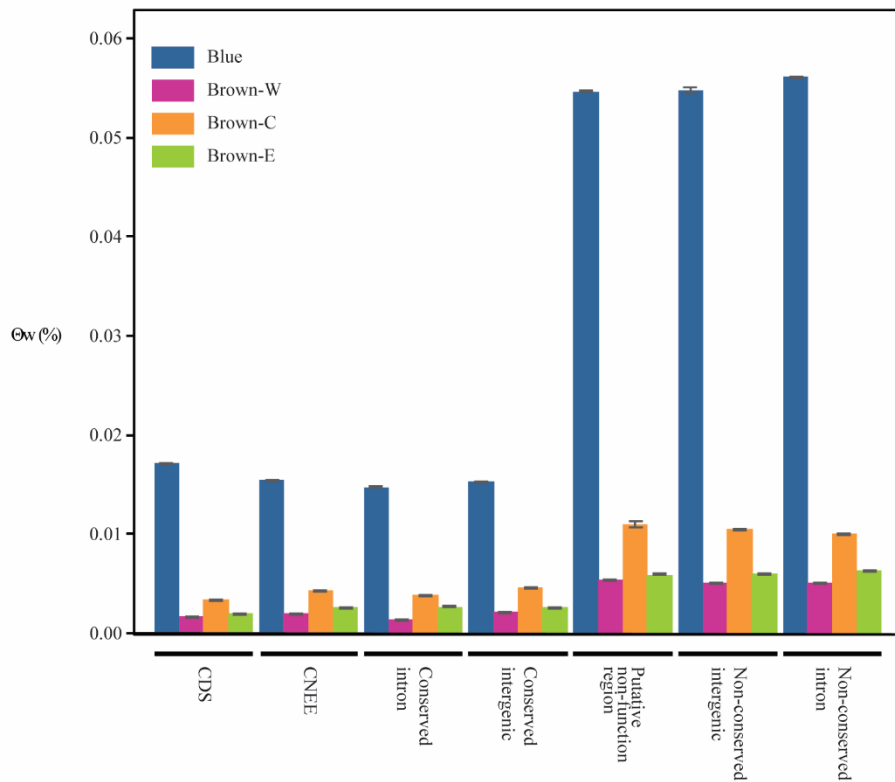

682

683 Fig. S8. Genetic diversity ( $\theta_w$ ) of each population in different regions (CDS: coding  
 684 region; CNEE: conserved non-exonic elements; conserved intron; conserved intergenic;  
 685 putative non-function region; non-conserved intergenic; and non-conserved intron).  
 686 Error bars represent 95% confidence intervals estimated from 1,000 bootstrap  
 687 resampling.

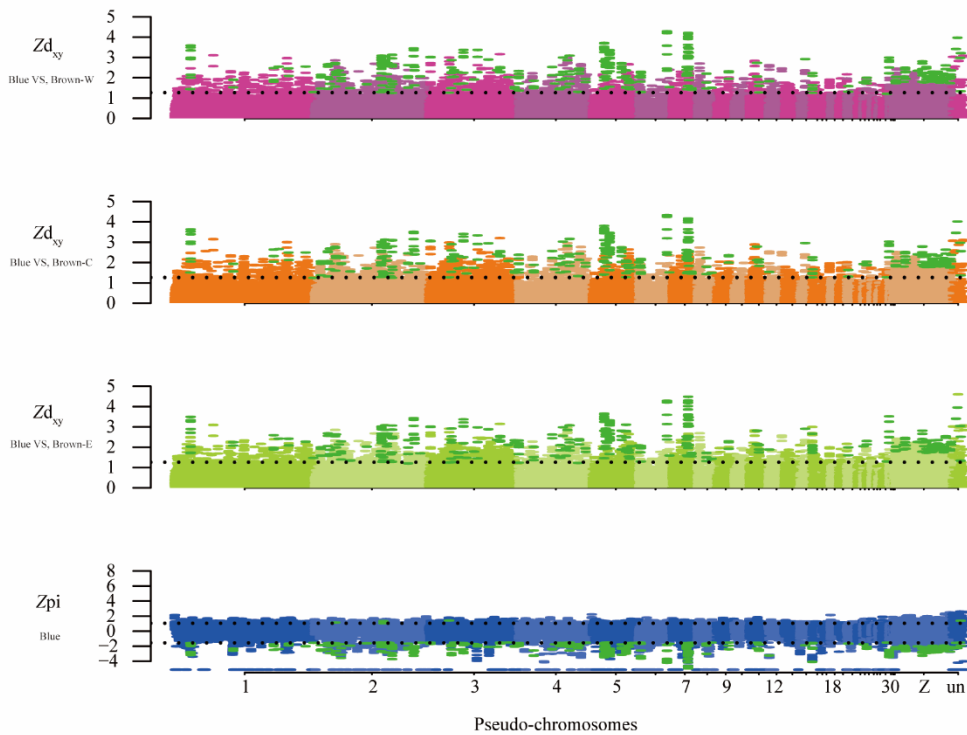

688

689 Fig. S9. Manhattan plots of the genome-wide  $Zd_{xy}$  and  $Zpi$ . The points above the dotted  
 690 line in the  $Zd_{xy}$  Manhattan plots are the windows with the top 5%  $Zd_{xy}$ . The points  
 691 above the upper dotted line and the points under the lower dotted line in the  $Zpi$   
 692 Manhattan plot are the windows with top 5% and bottom 5%  $Zpi$ . The green points are  
 693 the windows with the genes putatively under positive selection.

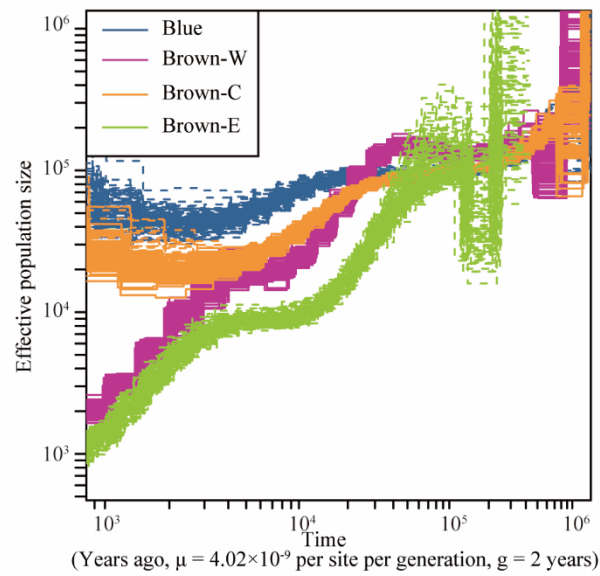

694

695 Fig. S10. Demographic history of *Crossoptilon mantchuricum* and *Crossoptilon*  
696 *auritum* estimated from the 100 times MSMC bootstrap. The MSMC results show the  
697 demographic history of the four populations. The blue line represents *C. auritum* (Blue);  
698 the purple, brown, and green lines represent the Western (Brown-W), Central (Brown-  
699 C), and Eastern (Brown-E) populations of *C. mantchuricum*, respectively.

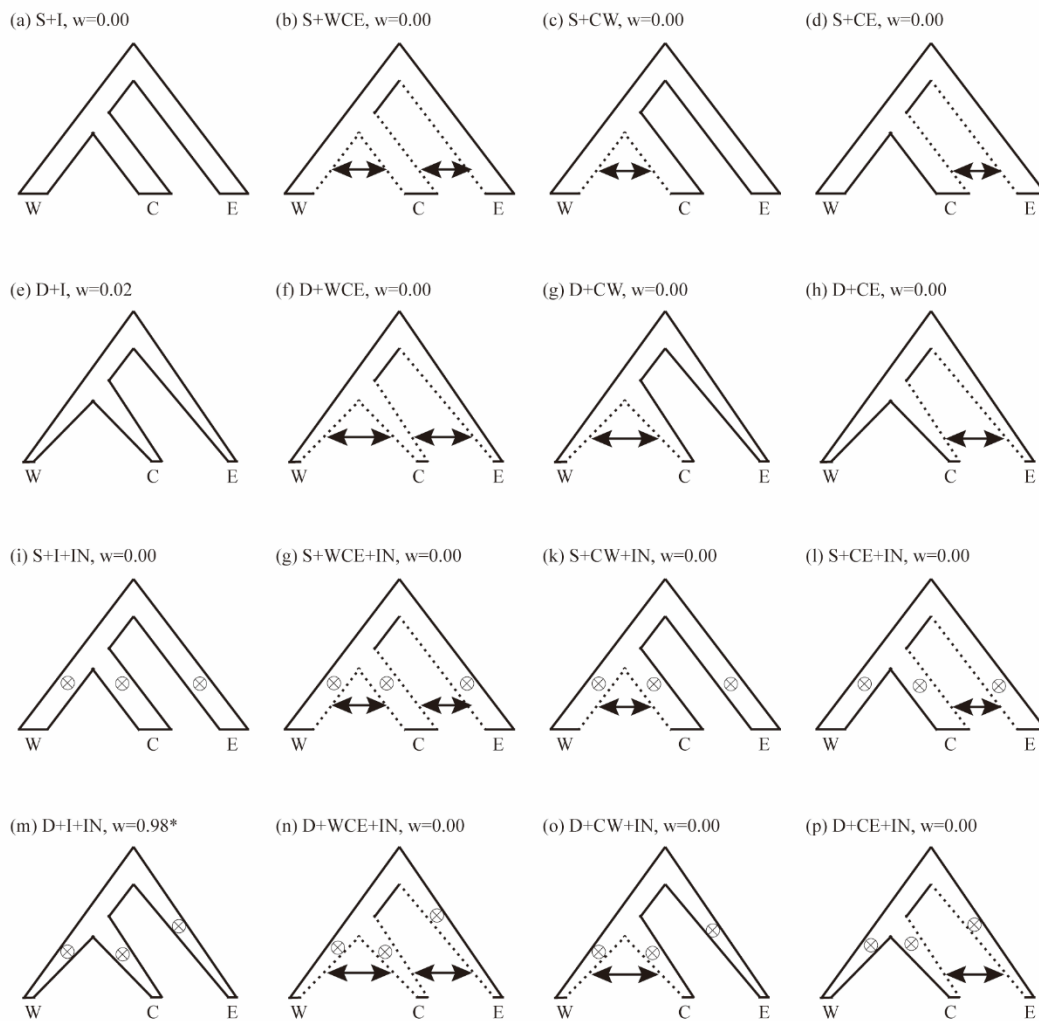

700

701 Fig. S11. The demographic models inferred by fastsimcoal26. S represents consistent  
 702 small population size, D represents population decline, I indicates that there was no  
 703 gene flow between adjacent populations, WCE indicates that there was gene flow  
 704 between adjacent populations, CW indicates that the gene flow only existed between  
 705 the Western and Central populations, CE indicates that the migration only occurred  
 706 between the Central and Eastern populations, and IN indicates that inbreeding occurred.  
 707 w represents the Akaike weights. The D+I+IN model obtained the ideal amount of  
 708 support, which was marked by the asterisk.



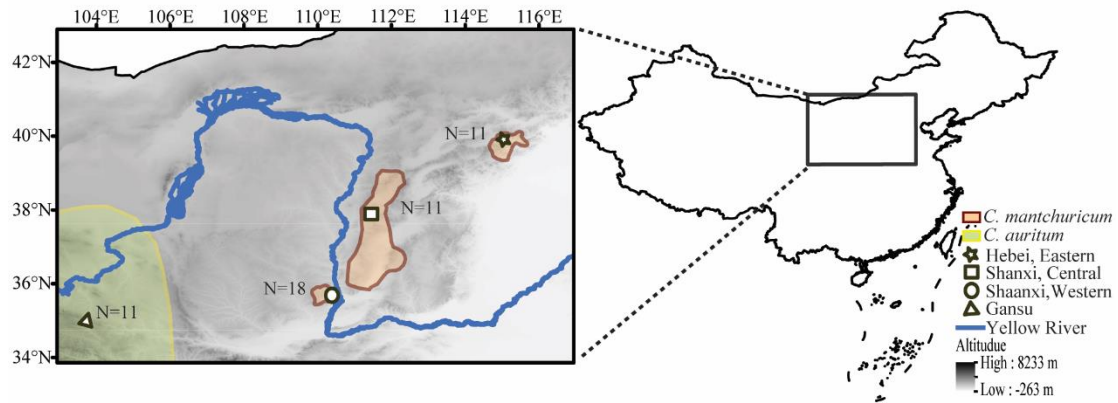

709

710 Fig. S12. Sample locations. N indicates the number of samples for each population. The  
 711 brown regions indicate the distribution of *Crossoptilon mantchuricum*, while the light-  
 712 yellow region indicates the distribution of *Crossoptilon auritum*. The star represents the  
 713 Eastern population of *C. mantchuricum* (Brown-E), the square represents the Central  
 714 population of *C. mantchuricum* (Brown-C), the circle represents the Western population  
 715 of *C. mantchuricum* (Brown-W), and the triangle represents *C. auritum* (Blue).

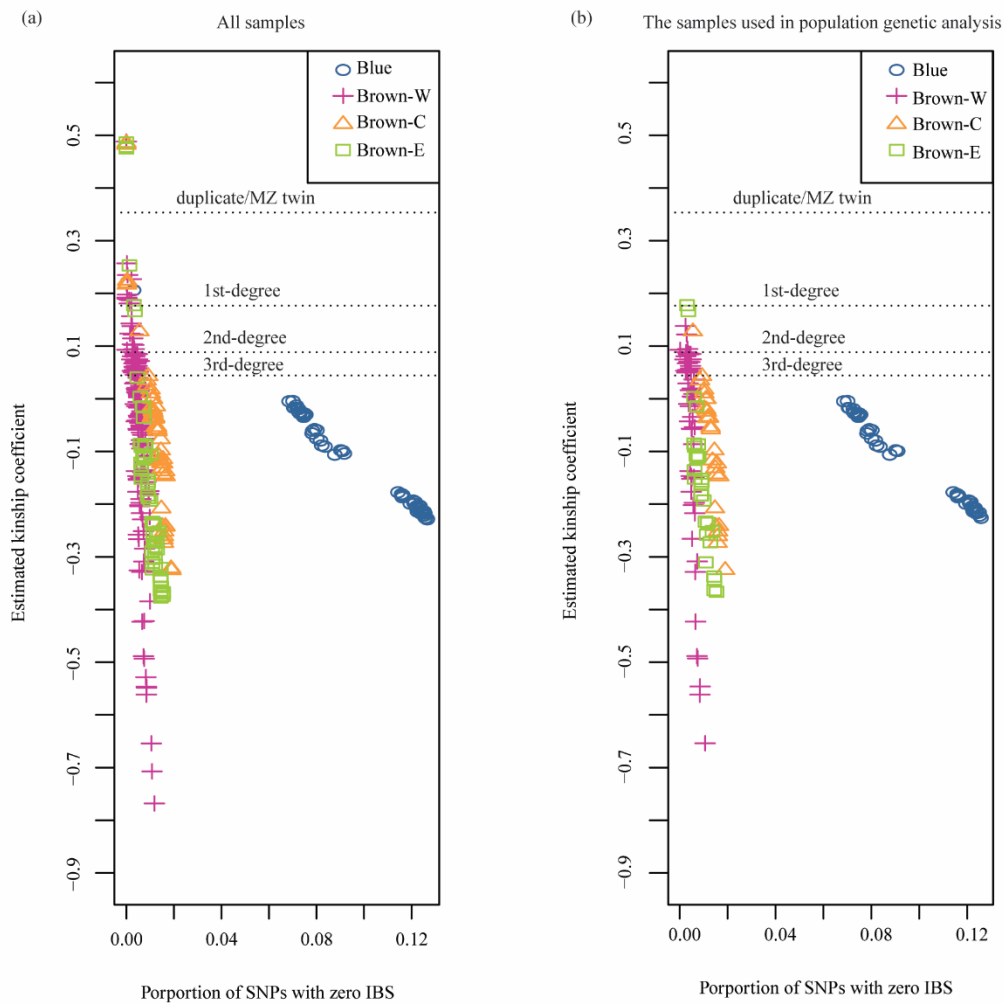

716

717 Fig. S13. Individuals' kinship within populations. Zero IBS indicates non-Identical-By-  
 718 State. The dashed lines show the kinship thresholds (duplicate/MZ twin, 1<sup>st</sup>-degree, 2<sup>nd</sup>-  
 719 degree, 3<sup>rd</sup>-degree). (a) and (b) show the relatedness of all samples within populations  
 720 and the individuals used in the population genetic analysis in each population,  
 721 respectively.

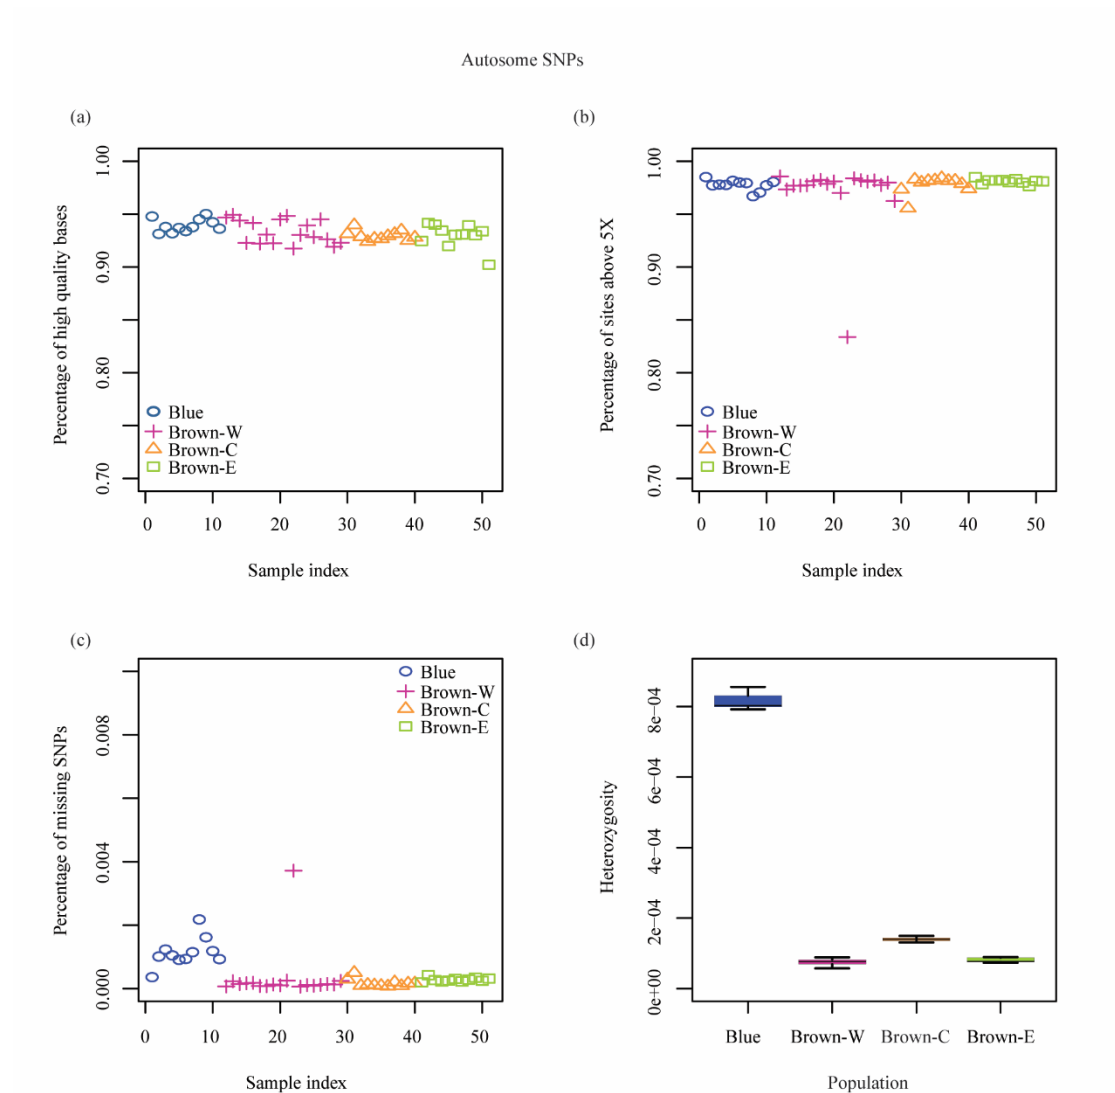

722

723 Fig. S14. Variant quality metrics of autosomes. The corresponding sample of each  
 724 sample index can be seen in Supplementary Dataset S11. (a) Individual percentage of  
 725 high-quality sites in the BAM file (the call quality of the bases was Q20 or higher). (b)  
 726 Individual percentage of sites in the BAM file with coverage greater than 5 X. (c)  
 727 Individual percentage of missing SNPs. (d) Heterozygosity of each sample in the four  
 728 populations. In the box plots, the bold black line represents the median, and the boxes  
 729 limit the 25<sup>th</sup> and 75<sup>th</sup> percentiles of the distributions.

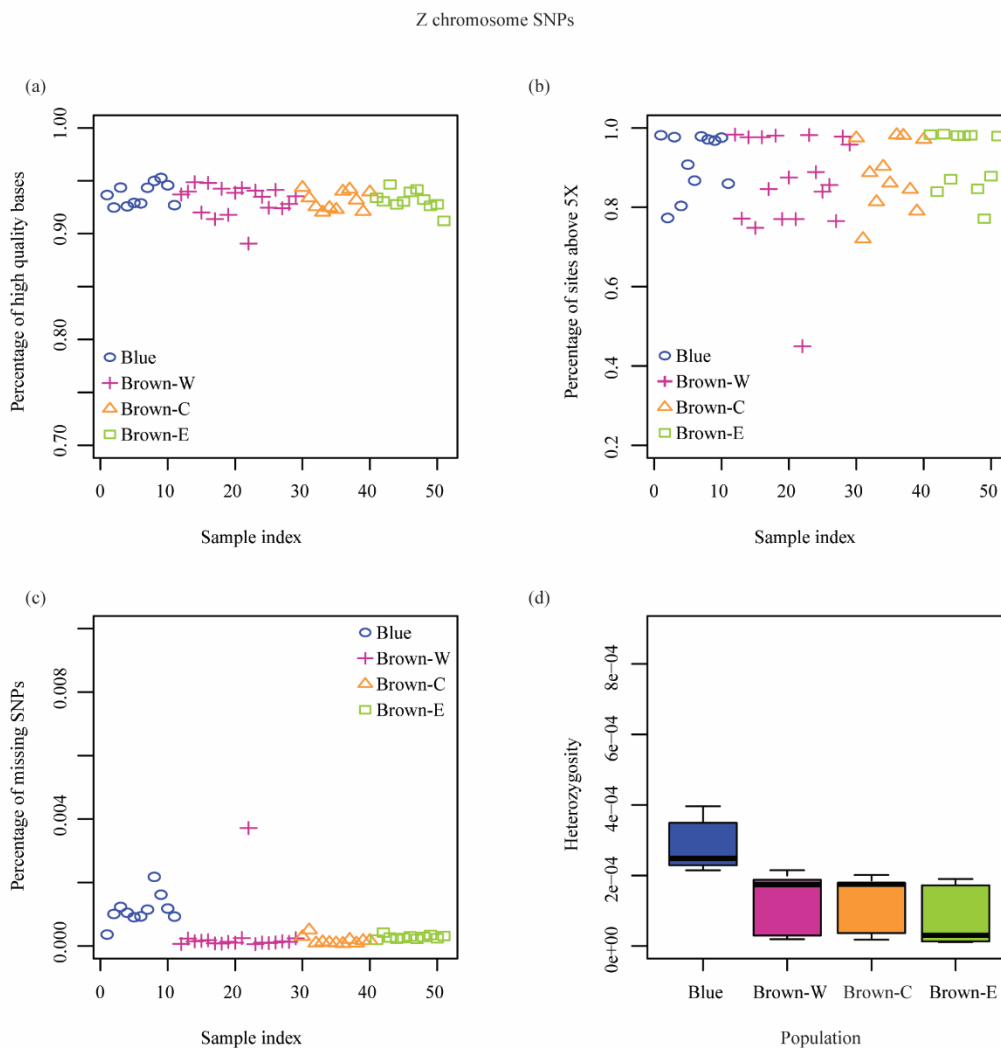

730

731 Fig. S15. Variant quality metrics of the Z chromosome. The corresponding sample of  
 732 each sample index can be seen in Supplementary Dataset S11. (a) Individual percentage  
 733 of high-quality sites in the BAM file (the call quality of the bases was Q20 or higher).  
 734 (b) Individual percentage of sites in the BAM file with coverage greater than 5 X. (c)  
 735 Individual percentage of missing SNPs. (d) Heterozygosity of each sample in the four  
 736 populations. In the box plots, the bold black line represents the median, and the boxes  
 737 limit the 25<sup>th</sup> and 75<sup>th</sup> percentiles of the distributions.

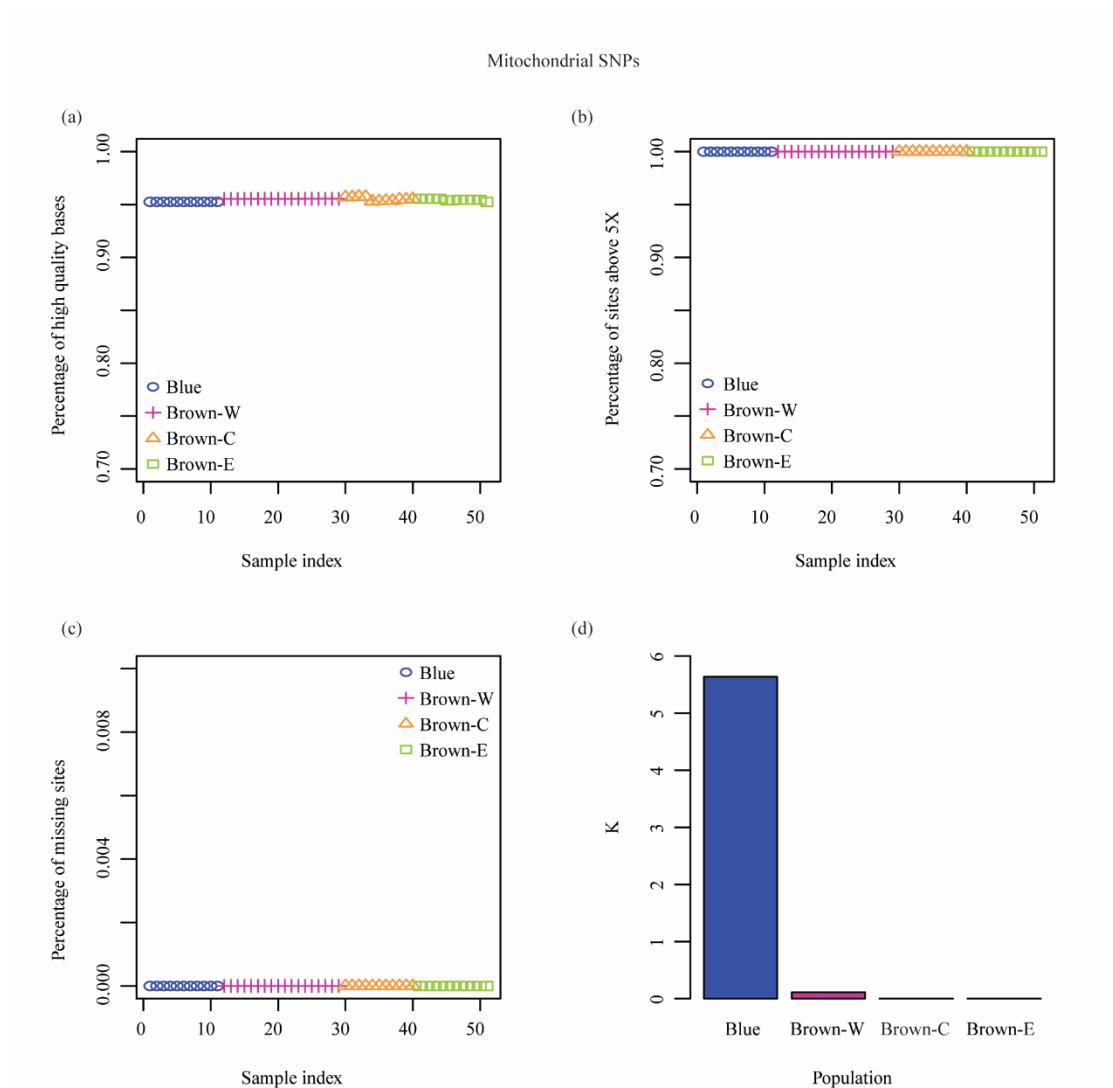

738

739 Fig. S16. Variant quality metrics of the mitogenome. The corresponding sample of each  
 740 sample index can be seen in Supplementary Dataset S11. (a) Individual percentage of  
 741 high-quality sites in the BAM file (the call quality of the bases was Q20 or higher). (b)  
 742 Individual percentage of sites in the BAM file with coverage greater than 5 X. (c)  
 743 Individual percentage of missing sites. (d) Average number of nucleotide differences  
 744 for each population (K).

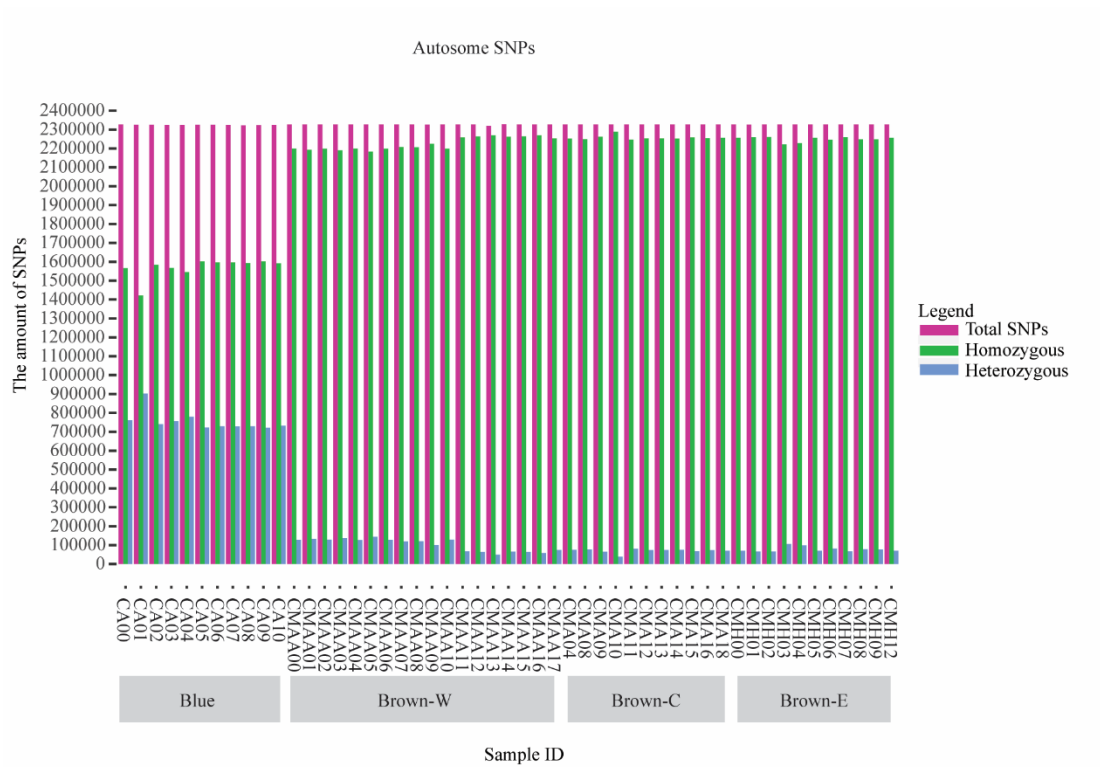

745

746 Fig. S17. Variant number of autosomes for the 51 individuals on a population-scale.

747 Sample IDs with the abbreviations Blue, Brown-W, Brown-C, and Brown-E denoted

748 individuals from *Crossoptilon auritum* and the Western, Central, and Eastern

749 populations of *Crossoptilon mantchuricum*, respectively.

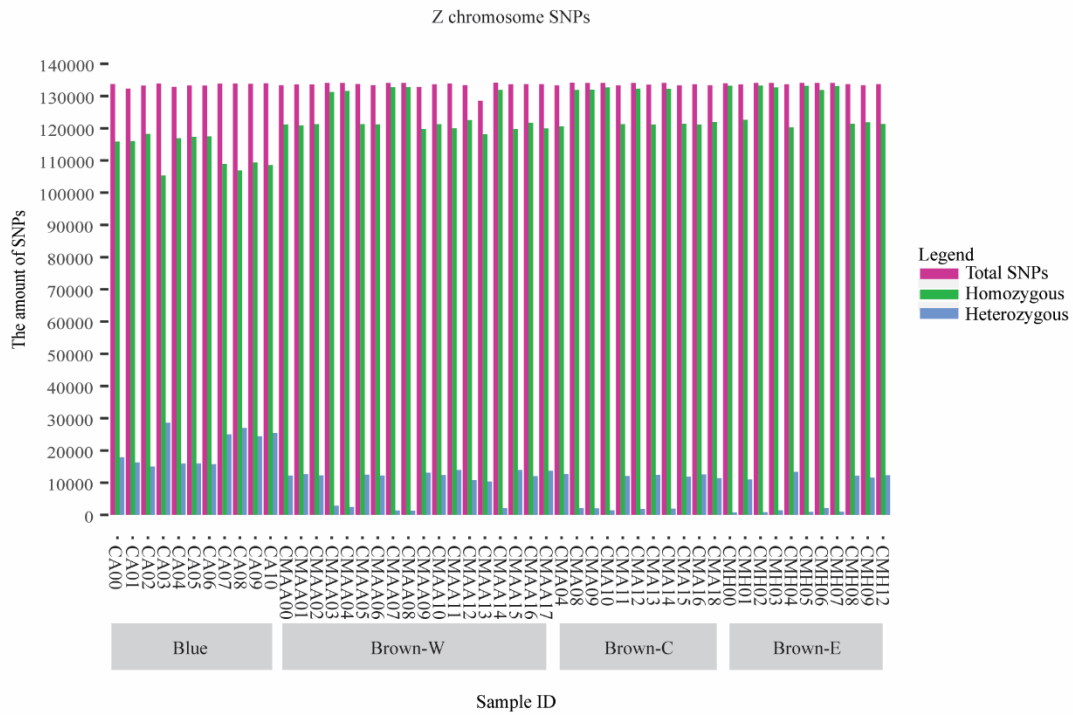

750

751 Fig. S18. Variant number of the Z chromosome for the 51 individuals on a population-  
 752 scale. Sample IDs with the abbreviations Blue, Brown-W, Brown-C, and Brown-E  
 753 indicate individuals from *Crossoptilon auritum* and the Western, Central, and Eastern  
 754 populations of *Crossoptilon mantchuricum*, respectively.

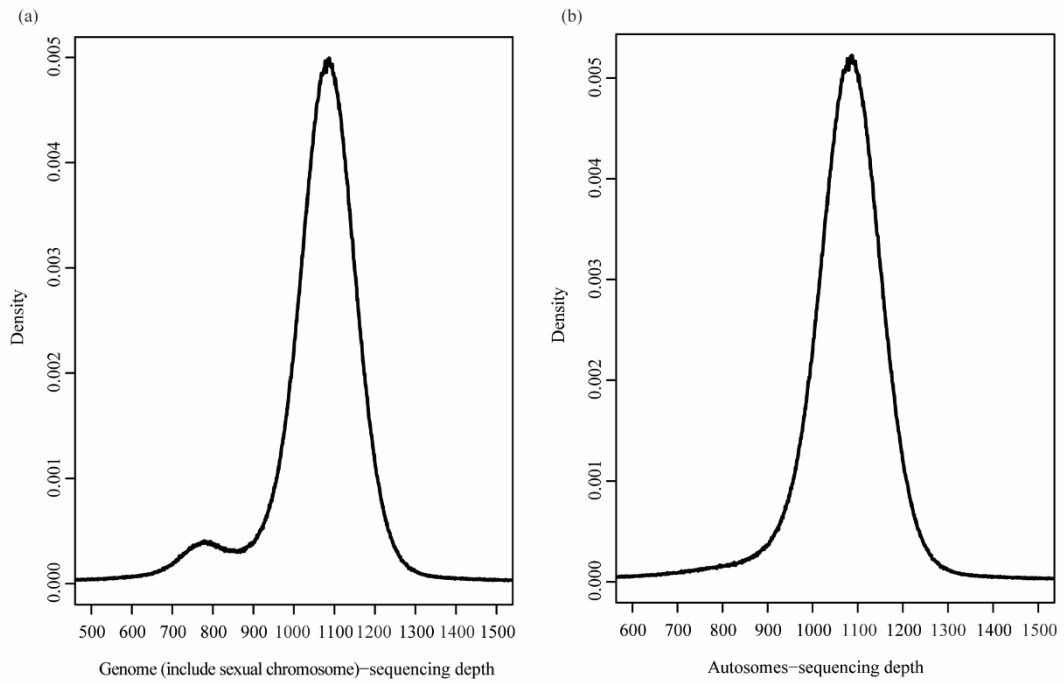

755

756 Fig. S19. Distribution of sequencing depth across 51 individuals for (a) the whole  
757 genome (including sex chromosomes) and (b) the autosomes.



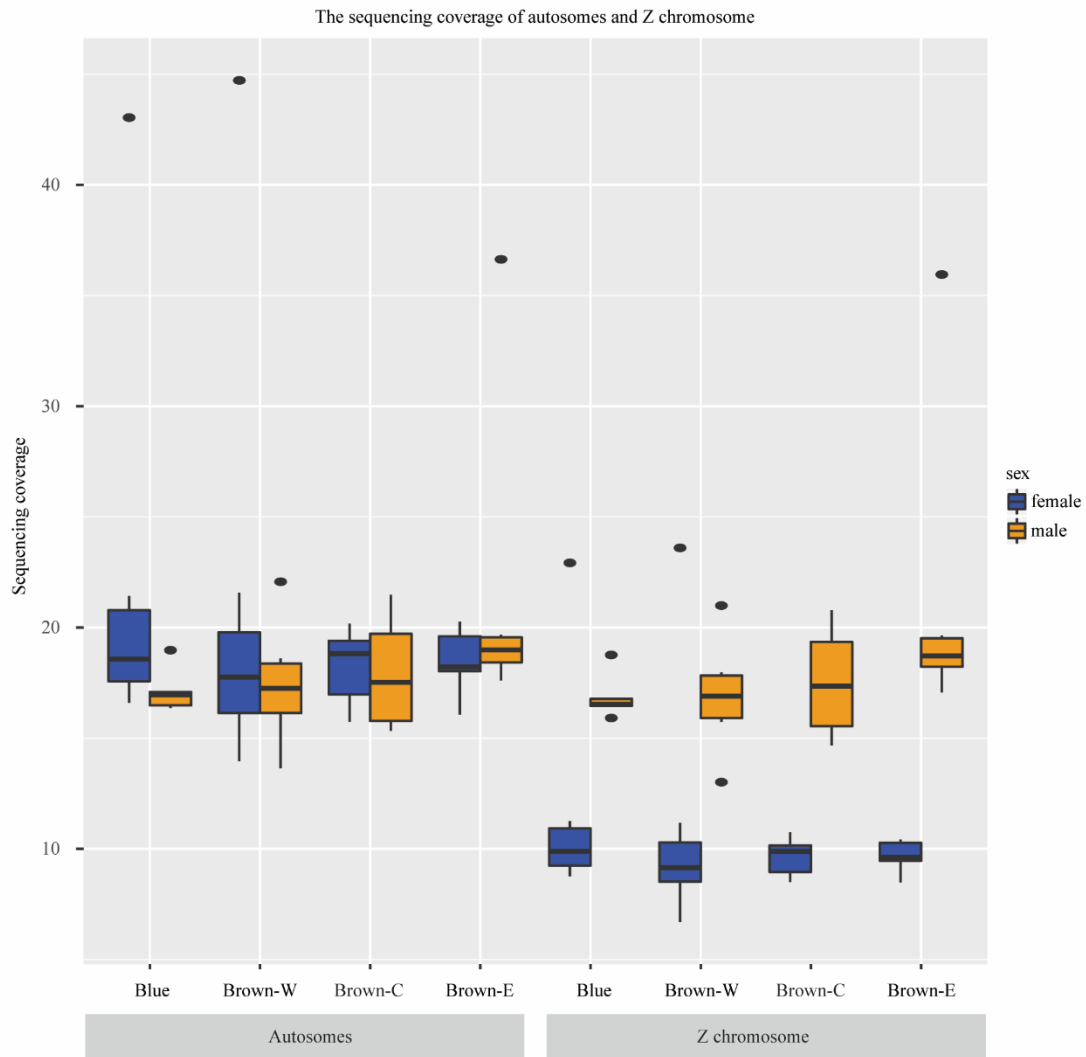

758

759 Fig. S20. Sequencing coverage of males and females. Blue boxes indicate the summary  
 760 of the female individuals, orange boxes indicate the summary of the male individuals.  
 761 In the box plots, the bold black line represents the median, and the boxes limit the 25<sup>th</sup>  
 762 and 75<sup>th</sup> percentiles of the distributions, while the points are the outlier values. The label  
 763 under the plots indicates the population symbol and genomic part.

Dataset S1: Completeness evaluation results.

|                                     | Draft genome  |
|-------------------------------------|---------------|
| Complete and single-copy BUSCOs (S) | 4624 (94.08%) |
| Complete and duplicated BUSCOs (D)  | 52 (1.06%)    |
| Fragmented BUSCOs (F)               | 134 (2.73%)   |
| Missing BUSCOs (M)                  | 105 (2.14%)   |
| Total BUSCO groups searched         | 4915          |

Dataset S2: Summary of the genetic diversity (heterozygous SNP rate) of inbreeding and outbreeding birds on an autosome scale. The genetic diversity of *Crossoptilon mantchuricum* and *Crossoptilon auritum* is the average value within each isolated population. The genetic diversity of other organisms is the lowest value in the corresponding reported population.

| Species                            | Common_Name                    | Class | IUCN status     | Heterozygous SNP rate | Seq_Type    | Source DOI                |
|------------------------------------|--------------------------------|-------|-----------------|-----------------------|-------------|---------------------------|
| <i>Crossoptilon mantchuricum</i>   | Brown eared pheasant (Western) | Aves  | Vulnerable      | 7.33E-05              | genome-wide | Curent study              |
| <i>Crossoptilon mantchuricum</i>   | Brown eared pheasant (Eastern) | Aves  | Vulnerable      | 8.73E-05              | genome-wide | Curent study              |
| <i>Crossoptilon mantchuricum</i>   | Brown eared pheasant (Center)  | Aves  | Vulnerable      | 1.37E-04              | genome-wide | Curent study              |
| <i>Haliaeetus albicilla</i>        | White tailed eagle             | Aves  | Least Concern   | 4.00E-04              | genome-wide | 10.1186/s13059-014-0557-1 |
| <i>Haliaeetus leucocephalus</i>    | Bald eagle                     | Aves  | Least Concern   | 4.30E-04              | genome-wide | 10.1186/s13059-014-0557-1 |
| <i>Nipponia nippon</i>             | Crested ibis                   | Aves  | Endangered      | 4.30E-04              | genome-wide | 10.1186/s13059-014-0557-1 |
| <i>Pelecanus crispus</i>           | Dalmatian pelican              | Aves  | Near Threatened | 6.00E-04              | genome-wide | 10.1186/s13059-014-0557-1 |
| <i>Falco peregrinus</i>            | Peregrine falcon               | Aves  | Least Concern   | 7.00E-04              | genome-wide | 10.1038/ng.2588           |
| <i>Aptenodytes patagonicus</i>     | King penguin                   | Aves  | Least Concern   | 7.20E-04              | RNAseq      | 10.1038/nature13685       |
| <i>Eudyptes moseleyi</i>           | Northern rockhopper penguin    | Aves  | Endangered      | 7.97E-04              | RNAseq      | 10.1038/nature13685       |
| <i>Falco cherrug</i>               | Saker falcon                   | Aves  | Endangered      | 8.00E-04              | genome-wide | 10.1038/ng.2588           |
| <i>Crossoptilon auritum</i>        | Blue eared pheasant            | Aves  | Least Concern   | 8.25E-04              | genome-wide | Curent study              |
| <i>Nestor notabilis</i>            | Kea                            | Aves  | Endangered      | 9.10E-04              | genome-wide | 10.1186/s13059-014-0557-1 |
| <i>Eudyptes chrysocome filholi</i> | Eastern rockhopper penguin     | Aves  | Vulnerable      | 1.14E-03              | RNAseq      | 10.1038/nature13685       |
| <i>Ectopistes migratorius</i>      | Passenger pigeon               | Aves  | Extinct         | 1.20E-03              | genome-wide | 10.1073/pnas.1401526111   |
| <i>Cyanistes caeruleus</i>         | Eurasian blue tit              | Aves  | Least Concern   | 1.27E-03              | RNAseq      | 10.1038/nature13685       |
| <i>Phalacrocorax carbo</i>         | Great black cormorant          | Aves  | Least Concern   | 1.39E-03              | genome-wide | 10.1186/s13059-014-0557-1 |
| <i>Taeniopygia guttata</i>         | Zebra finch                    | Aves  | Least Concern   | 1.40E-03              | genome-wide | 10.1038/nature08819       |

|                                |                     |      |               |          |             |                              |
|--------------------------------|---------------------|------|---------------|----------|-------------|------------------------------|
| <i>Apteryx mantelli</i>        | Kiwi                | Aves | Vulnerable    | 1.50E-03 | genome-wide | 10.1186/s13059-015-0711-4    |
| <i>Meleagris gallopavo</i>     | Wild turkey         | Aves | Least Concern | 2.37E-03 | genome-wide | 10.1371/journal.pbio.1002112 |
| <i>Egretta garzetta</i>        | Little egret        | Aves | Least Concern | 2.51E-03 | genome-wide | 10.1186/s13059-014-0557-1    |
| <i>Anas platyrhynchos</i>      | Mallard             | Aves | Least Concern | 2.61E-03 | genome-wide | 10.1038/ng.2657              |
| <i>Ficedula albicollis</i>     | Collared flycatcher | Aves | Least Concern | 3.80E-03 | genome-wide | 10.1371/journal.pbio.1002112 |
| <i>Melopsittacus undulatus</i> | Budgerigar          | Aves | Least Concern | 4.31E-03 | genome-wide | 10.1186/s13059-014-0557-1    |
| <i>Gallus gallus</i>           | Chicken             | Aves | Least Concern | 5.88E-03 | genome-wide | 10.1371/journal.pbio.1002112 |

---

Dataset S3: Genetic diversity of the zero-fold degenerate sites and four-fold degenerate sites. The numbers in brackets are 95% confidence intervals, which were obtained from bootstrapping 1,000 times.

| Site Class | Population | $\theta_{\pi}$ (%), 95% CI       | $\theta_w$ (%), 95% CI           | $\theta_{\pi}$ (zero-fold) / $\theta_{\pi}$ (fold-fold) |
|------------|------------|----------------------------------|----------------------------------|---------------------------------------------------------|
| zero-fold  | Blue       | 0.030145% [0.030136%, 0.030154%] | 0.020448% [0.020442%, 0.020453%] | 0.273340 [0.273220, 0.273459]                           |
|            | Brown-W    | 0.002670% [0.002666%, 0.002675%] | 0.002237% [0.002234%, 0.002240%] | 0.308766 [0.307968, 0.309564]                           |
|            | Brown-C    | 0.005474% [0.005467%, 0.005481%] | 0.004528% [0.004523%, 0.004533%] | 0.318080 [0.317500, 0.318661]                           |
|            | Brown-E    | 0.003683% [0.003678%, 0.003689%] | 0.002817% [0.002813%, 0.002821%] | 0.369310 [0.368405, 0.370215]                           |
| four-fold  | Blue       | 0.110287% [0.110255%, 0.110320%] | 0.074654% [0.074636%, 0.074672%] |                                                         |
|            | Brown-W    | 0.008657% [0.008640%, 0.008675%] | 0.006903% [0.006891%, 0.006916%] |                                                         |
|            | Brown-C    | 0.017218% [0.017194%, 0.017242%] | 0.014164% [0.014145%, 0.014182%] |                                                         |
|            | Brown-E    | 0.009983% [0.009964%, 0.010001%] | 0.007687% [0.007673%, 0.007701%] |                                                         |

Dataset S4: The derived loss-of-function mutations in the potential adaptive genes.

| Gene ID       | The frequency of derived loss-of-function (LOF) mutations |         |         |         | Protein ID       | Protein name                               | The site of amino acid substitution | Function                                             |
|---------------|-----------------------------------------------------------|---------|---------|---------|------------------|--------------------------------------------|-------------------------------------|------------------------------------------------------|
|               | Blue                                                      | Brown-W | Brown-C | Brown-E |                  |                                            |                                     |                                                      |
| EARP_00000097 | 0.8                                                       | 0       | 0       | 0       | EARP_00000097-RA | helix-turn-helix domain-containing protein | Q552*                               | regulate gene expression                             |
| EARP_00005078 | 0.1                                                       | 1       | 1       | 1       | EARP_00005078-RB | ring finger protein 146                    | K361*                               | facilitate DNA repair and protect against cell death |

Dataset S5: The derived missense mutations in the potential adaptive genes. A PROVEAN score less than -2.5 indicates that the corresponding derived missense mutations were deleterious. Blue represents *Crossoptilon auritum*, while Brown-W, Brown-C, and Brown-E represent the Western, Central, and Eastern populations of *Crossoptilon mantchuricum*, respectively.

| Protein ID       | The site of amino acid substitution | Frequency |          |          | Proven scores | Unique fixed to <i>C. mantchuricum</i> ? | Unique fixed to <i>C. auritum</i> ? |          |
|------------------|-------------------------------------|-----------|----------|----------|---------------|------------------------------------------|-------------------------------------|----------|
|                  |                                     | Blue      | Brown -W | Brown -C |               |                                          |                                     | Brown -E |
| EARP_00000044-RA | D411N                               | 0.40      | 0.00     | 0.00     | 0.00          | 0.160                                    | no                                  | no       |
| EARP_00000045-RA | R101G                               | 0.00      | 1.00     | 1.00     | 1.00          | 0.867                                    | yes                                 | no       |
| EARP_00000097-RA | A979T                               | 0.70      | 0.00     | 0.00     | 0.00          | -4.000                                   | no                                  | no       |
| EARP_00000097-RA | C1895Y                              | 1.00      | 1.00     | 1.00     | 1.00          | -11.000                                  | no                                  | no       |
| EARP_00000097-RA | D2118G                              | 0.00      | 1.00     | 1.00     | 1.00          | -7.000                                   | yes                                 | no       |
| EARP_00000097-RA | D2650G                              | 0.80      | 1.00     | 1.00     | 0.00          | -7.000                                   | no                                  | no       |
| EARP_00000097-RA | D28V                                | 0.60      | 0.00     | 0.00     | 0.00          | -9.000                                   | no                                  | no       |
| EARP_00000097-RA | E631K                               | 0.60      | 0.00     | 0.00     | 0.00          | -4.000                                   | no                                  | no       |
| EARP_00000097-RA | E63V                                | 0.50      | 1.00     | 1.00     | 1.00          | -7.000                                   | no                                  | no       |
| EARP_00000097-RA | F19L                                | 0.20      | 1.00     | 1.00     | 1.00          | -6.000                                   | no                                  | no       |
| EARP_00000097-RA | F2851S                              | 0.40      | 1.00     | 1.00     | 1.00          | -8.000                                   | no                                  | no       |
| EARP_00000097-RA | F303Y                               | 0.70      | 1.00     | 1.00     | 1.00          | -3.000                                   | no                                  | no       |
| EARP_00000097-RA | G1018D                              | 0.00      | 1.00     | 1.00     | 0.00          | -7.000                                   | yes                                 | no       |
| EARP_00000097-RA | G39R                                | 0.10      | 1.00     | 1.00     | 1.00          | -8.000                                   | no                                  | no       |
| EARP_00000097-RA | L2621F                              | 0.00      | 1.00     | 1.00     | 0.00          | -4.000                                   | yes                                 | no       |
| EARP_00000097-RA | N777S                               | 1.00      | 1.00     | 1.00     | 1.00          | -5.000                                   | no                                  | no       |
| EARP_00000097-RA | N785S                               | 1.00      | 1.00     | 1.00     | 1.00          | -5.000                                   | no                                  | no       |
| EARP_00000097-RA | P1235L                              | 0.00      | 1.00     | 1.00     | 1.00          | -10.000                                  | yes                                 | no       |
| EARP_00000097-RA | Q851K                               | 0.00      | 1.00     | 1.00     | 1.00          | -4.000                                   | yes                                 | no       |
| EARP_00000097-RA | R29G                                | 0.50      | 0.00     | 0.00     | 0.00          | -7.000                                   | no                                  | no       |
| EARP_00000097-RA | R29S                                | 0.50      | 0.00     | 0.00     | 0.00          | -6.000                                   | no                                  | no       |
| EARP_00000097-RA | R364H                               | 0.80      | 0.00     | 0.00     | 0.00          | -5.000                                   | no                                  | no       |
| EARP_00000097-RA | R374C                               | 0.80      | 0.00     | 0.00     | 0.00          | -8.000                                   | no                                  | no       |
| EARP_00000097-RA | S1875P                              | 0.90      | 1.00     | 1.00     | 1.00          | -5.000                                   | no                                  | no       |
| EARP_00000097-RA | S1899F                              | 0.40      | 0.00     | 0.00     | 0.00          | -6.000                                   | no                                  | no       |
| EARP_00000097-RA | T1451I                              | 0.90      | 1.00     | 1.00     | 0.00          | -6.000                                   | no                                  | no       |
| EARP_00000097-RA | T2466A                              | 0.00      | 1.00     | 1.00     | 0.00          | -5.000                                   | yes                                 | no       |
| EARP_00000097-RA | T388S                               | 0.40      | 1.00     | 1.00     | 1.00          | -4.000                                   | no                                  | no       |
| EARP_00000097-RA | V295I                               | 0.00      | 1.00     | 1.00     | 1.00          | -1.000                                   | yes                                 | no       |
| EARP_00000097-RA | W1433C                              | 0.70      | 0.00     | 0.00     | 1.00          | -13.000                                  | no                                  | no       |
| EARP_00000193-RA | V109A                               | 0.30      | 1.00     | 1.00     | 0.00          | -4.000                                   | no                                  | no       |
| EARP_00000985-RA | P8L                                 | 1.00      | 0.00     | 0.00     | 0.00          | -0.662                                   | no                                  | yes      |
| EARP_00000986-RA | N62S                                | 1.00      | 0.00     | 0.00     | 0.00          | -0.005                                   | no                                  | yes      |

|                  |        |      |      |      |      |         |     |     |
|------------------|--------|------|------|------|------|---------|-----|-----|
| EARP_00000987-RA | R94Q   | 0.00 | 1.00 | 1.00 | 1.00 | 2.941   | yes | no  |
| EARP_00000987-RA | S28G   | 1.00 | 0.00 | 0.00 | 0.00 | 3.198   | no  | yes |
| EARP_00000989-RA | H1599N | 0.00 | 0.00 | 0.00 | 0.50 | -5.304  | no  | no  |
| EARP_00000989-RA | M2378I | 1.00 | 0.00 | 0.00 | 0.00 | -0.534  | no  | yes |
| EARP_00000989-RA | S2400I | 1.00 | 0.00 | 0.00 | 0.00 | -1.674  | no  | yes |
| EARP_00002145-RB | R43G   | 0.70 | 1.00 | 1.00 | 1.00 | -7.000  | no  | no  |
| EARP_00002148-RA | K24E   | 0.70 | 0.00 | 0.00 | 0.00 | -4.000  | no  | no  |
| EARP_00002148-RA | R38H   | 0.60 | 0.00 | 0.00 | 0.00 | -5.000  | no  | no  |
| EARP_00002233-RA | S134N  | 0.90 | 0.00 | 0.00 | 0.00 | -1.428  | no  | no  |
| EARP_00002234-RB | A1163T | 1.00 | 0.00 | 0.00 | 0.00 | -2.246  | no  | yes |
| EARP_00002234-RB | L1777P | 0.00 | 1.00 | 1.00 | 1.00 | 0.517   | yes | no  |
| EARP_00002634-RB | G162S  | 0.70 | 0.00 | 0.00 | 0.00 | 0.906   | no  | no  |
| EARP_00002634-RB | T32I   | 1.00 | 0.00 | 0.00 | 0.00 | 0.037   | no  | yes |
| EARP_00003544-RA | A1335T | 0.10 | 1.00 | 1.00 | 1.00 | 3.314   | no  | no  |
| EARP_00003544-RA | L1630P | 0.10 | 1.00 | 1.00 | 1.00 | 0.083   | no  | no  |
| EARP_00003544-RA | S932P  | 0.20 | 1.00 | 1.00 | 1.00 | 2.139   | no  | no  |
| EARP_00003544-RA | V988I  | 0.70 | 0.00 | 0.00 | 0.00 | 0.255   | no  | no  |
| EARP_00003545-RC | T48A   | 0.90 | 1.00 | 1.00 | 1.00 | 0.433   | no  | no  |
| EARP_00003547-RA | H651Q  | 0.70 | 0.00 | 0.00 | 0.00 | 0.401   | no  | no  |
| EARP_00003548-RB | K103E  | 0.00 | 1.00 | 1.00 | 1.00 | 0.389   | yes | no  |
| EARP_00003548-RB | Y122D  | 0.00 | 1.00 | 1.00 | 1.00 | 2.078   | yes | no  |
| EARP_00005078-RB | G339R  | 0.20 | 1.00 | 1.00 | 1.00 | -8.000  | no  | no  |
| EARP_00005078-RB | H401R  | 0.10 | 1.00 | 1.00 | 1.00 | -8.000  | no  | no  |
| EARP_00005078-RB | H401Y  | 1.00 | 0.00 | 0.00 | 0.00 | -6.000  | no  | yes |
| EARP_00005078-RB | N337S  | 0.20 | 1.00 | 1.00 | 1.00 | -5.000  | no  | no  |
| EARP_00005078-RB | Q247R  | 0.00 | 1.00 | 1.00 | 1.00 | -4.000  | yes | no  |
| EARP_00005078-RB | R141W  | 1.00 | 0.00 | 0.00 | 0.00 | -2.000  | no  | yes |
| EARP_00005078-RB | R444G  | 1.00 | 0.00 | 0.00 | 0.00 | -1.000  | no  | yes |
| EARP_00005078-RB | S142F  | 0.00 | 0.00 | 0.25 | 0.88 | -6.000  | no  | no  |
| EARP_00005078-RB | T362I  | 0.10 | 1.00 | 1.00 | 1.00 | -6.000  | no  | no  |
| EARP_00005078-RB | V132M  | 1.00 | 0.00 | 0.00 | 0.00 | -3.000  | no  | yes |
| EARP_00006312-RA | A162P  | 0.80 | 0.00 | 0.00 | 0.00 | -5.000  | no  | no  |
| EARP_00006312-RA | W409L  | 0.40 | 0.00 | 0.00 | 0.00 | -13.000 | no  | no  |
| EARP_00006312-RA | Y714H  | 0.20 | 1.00 | 1.00 | 1.00 | -5.000  | no  | no  |
| EARP_00006313-RA | V812A  | 0.40 | 1.00 | 1.00 | 1.00 | -4.000  | no  | no  |
| EARP_00006344-RA | G7D    | 0.70 | 0.00 | 0.00 | 0.00 | -7.000  | no  | no  |
| EARP_00006349-RB | I201V  | 0.60 | 0.00 | 0.00 | 0.00 | 0.427   | no  | no  |
| EARP_00006349-RB | V326A  | 0.80 | 0.00 | 0.00 | 0.00 | -0.455  | no  | no  |
| EARP_00006356-RA | A95T   | 0.00 | 1.00 | 1.00 | 0.75 | -0.252  | yes | no  |
| EARP_00006357-RC | V86L   | 0.00 | 1.00 | 1.00 | 1.00 | 0.494   | yes | no  |
| EARP_00006614-RD | E383K  | 1.00 | 0.00 | 0.00 | 0.00 | -1.865  | no  | yes |



|                  |        |      |      |      |      |        |     |     |
|------------------|--------|------|------|------|------|--------|-----|-----|
| EARP_00007488-RA | I62V   | 1.00 | 1.00 | 1.00 | 1.00 | 0.054  | no  | no  |
| EARP_00007490-RA | E1110K | 0.00 | 0.00 | 1.00 | 0.00 | -0.487 | yes | no  |
| EARP_00007490-RA | V5M    | 0.40 | 0.00 | 0.00 | 0.00 | -0.106 | no  | no  |
| EARP_00007491-RA | R77S   | 0.00 | 1.00 | 1.00 | 1.00 | -6.000 | yes | no  |
| EARP_00007492-RB | G579R  | 0.70 | 0.00 | 0.00 | 0.00 | -7.828 | no  | no  |
| EARP_00007492-RB | H1120N | 1.00 | 0.00 | 0.00 | 0.00 | -1.144 | no  | yes |
| EARP_00007492-RB | L479P  | 0.00 | 1.00 | 1.00 | 1.00 | 3.457  | yes | no  |
| EARP_00007492-RB | P353H  | 0.00 | 1.00 | 1.00 | 1.00 | 1.750  | yes | no  |
| EARP_00007492-RB | R559G  | 0.00 | 1.00 | 1.00 | 1.00 | 3.443  | yes | no  |
| EARP_00007492-RB | V418E  | 1.00 | 0.00 | 0.00 | 0.00 | -5.531 | no  | yes |
| EARP_00007494-RB | L12V   | 1.00 | 1.00 | 1.00 | 1.00 | -0.313 | no  | no  |
| EARP_00007509-RD | L543P  | 0.00 | 1.00 | 1.00 | 1.00 | 1.766  | yes | no  |
| EARP_00007509-RD | M56L   | 0.00 | 1.00 | 1.00 | 1.00 | 1.702  | yes | no  |
| EARP_00007510-RC | A6V    | 1.00 | 0.00 | 0.00 | 0.00 | -0.138 | no  | yes |
| EARP_00007511-RA | E41K   | 1.00 | 0.00 | 0.00 | 0.00 | -4.000 | no  | yes |
| EARP_00007511-RC | G1815D | 0.00 | 0.36 | 0.13 | 1.00 | 0.107  | yes | no  |
| EARP_00008168-RA | L1075F | 0.00 | 1.00 | 1.00 | 1.00 | 1.431  | yes | no  |
| EARP_00008168-RA | L1144S | 0.00 | 1.00 | 1.00 | 1.00 | 0.786  | yes | no  |
| EARP_00008598-RA | D338E  | 0.90 | 0.00 | 0.00 | 0.00 | 0.255  | no  | no  |
| EARP_00008600-RA | V4M    | 0.60 | 1.00 | 1.00 | 1.00 | 1.026  | no  | no  |
| EARP_00008602-RC | A34V   | 0.70 | 0.00 | 0.00 | 0.00 | -0.068 | no  | no  |
| EARP_00008602-RA | G51R   | 0.50 | 0.00 | 0.00 | 0.00 | 0.355  | no  | no  |
| EARP_00008602-RC | L22W   | 0.10 | 1.00 | 1.00 | 1.00 | -0.259 | no  | no  |
| EARP_00008602-RC | T26A   | 0.50 | 0.00 | 0.00 | 0.00 | -0.357 | no  | no  |
| EARP_00008602-RA | Y78C   | 0.10 | 1.00 | 1.00 | 1.00 | -0.378 | no  | no  |
| EARP_00008602-RA | Y78H   | 0.10 | 1.00 | 1.00 | 1.00 | 0.000  | no  | no  |
| EARP_00008603-RB | I842V  | 0.70 | 0.00 | 0.00 | 0.00 | 0.452  | no  | no  |
| EARP_00008603-RB | T311I  | 0.00 | 1.00 | 0.25 | 0.00 | 3.975  | yes | no  |
| EARP_00008603-RB | V382M  | 0.20 | 0.00 | 0.00 | 1.00 | -1.846 | no  | no  |
| EARP_00009935-RA | F57S   | 0.30 | 1.00 | 1.00 | 1.00 | -8.000 | no  | no  |
| EARP_00009935-RA | V65M   | 0.90 | 0.00 | 0.00 | 0.00 | -3.000 | no  | no  |
| EARP_00010173-RA | A428V  | 0.00 | 1.00 | 0.50 | 0.00 | -2.152 | yes | no  |
| EARP_00010175-RB | G285E  | 1.00 | 0.00 | 0.00 | 0.00 | 0.133  | no  | yes |
| EARP_00010175-RB | T949I  | 1.00 | 0.00 | 0.00 | 0.00 | -0.011 | no  | yes |
| EARP_00011418-RA | L1448M | 0.00 | 0.00 | 0.88 | 0.00 | 1.408  | no  | no  |
| EARP_00011419-RB | T208A  | 0.70 | 0.00 | 0.00 | 0.00 | 0.000  | no  | no  |
| EARP_00011419-RB | T446A  | 0.70 | 0.00 | 0.00 | 0.00 | -0.356 | no  | no  |
| EARP_00011586-RC | G208A  | 0.00 | 1.00 | 1.00 | 0.00 | 0.214  | yes | no  |
| EARP_00011586-RC | V33I   | 0.10 | 0.00 | 0.00 | 1.00 | -0.297 | no  | no  |
| EARP_00012749-RA | M467T  | 1.00 | 0.00 | 0.00 | 0.00 | 0.574  | no  | yes |
| EARP_00012749-RA | S3Y    | 0.80 | 0.00 | 0.00 | 0.00 | -1.320 | no  | no  |

|                  |        |      |      |      |      |        |     |     |
|------------------|--------|------|------|------|------|--------|-----|-----|
| EARP_00012844-RA | T1112P | 0.00 | 1.00 | 1.00 | 1.00 | -0.129 | yes | no  |
| EARP_00012844-RA | T1198A | 0.00 | 1.00 | 1.00 | 1.00 | 0.431  | yes | no  |
| EARP_00012846-RA | S376N  | 0.60 | 0.00 | 0.00 | 0.00 | 0.303  | no  | no  |
| EARP_00012846-RA | V1344E | 0.00 | 1.00 | 1.00 | 1.00 | 1.988  | yes | no  |
| EARP_00012848-RA | P104S  | 0.20 | 0.00 | 1.00 | 0.00 | -4.667 | no  | no  |
| EARP_00012944-RA | L33F   | 0.00 | 1.00 | 1.00 | 1.00 | -0.391 | yes | no  |
| EARP_00013131-RA | R511Q  | 0.70 | 0.00 | 0.00 | 0.00 | 0.000  | no  | no  |
| EARP_00013132-RA | I120V  | 1.00 | 0.00 | 0.00 | 0.00 | 1.000  | no  | yes |
| EARP_00013132-RA | L474S  | 0.00 | 1.00 | 1.00 | 1.00 | 6.000  | yes | no  |
| EARP_00013132-RA | M332V  | 0.00 | 1.00 | 1.00 | 1.00 | 3.000  | yes | no  |
| EARP_00013133-RA | P1884S | 0.80 | 0.00 | 0.00 | 0.00 | 0.337  | no  | no  |
| EARP_00013133-RA | S1767L | 0.80 | 0.00 | 0.00 | 0.00 | -1.419 | no  | no  |
| EARP_00013133-RA | T2351A | 1.00 | 0.00 | 0.00 | 0.00 | -0.568 | no  | yes |
| EARP_00013133-RA | V2114A | 0.80 | 0.00 | 0.13 | 0.00 | 0.655  | no  | no  |
| EARP_00013134-RA | T711I  | 0.00 | 1.00 | 1.00 | 1.00 | -0.500 | yes | no  |
| EARP_00013135-RA | T488K  | 0.40 | 0.00 | 0.00 | 0.00 | -6.000 | no  | no  |
| EARP_00013137-RA | I205M  | 0.00 | 1.00 | 1.00 | 1.00 | 1.217  | yes | no  |
| EARP_00013138-RA | T664A  | 0.60 | 1.00 | 1.00 | 1.00 | -2.663 | no  | no  |
| EARP_00013139-RA | E1834K | 0.40 | 0.00 | 0.00 | 0.00 | -0.870 | no  | no  |
| EARP_00013139-RA | H1168Q | 0.40 | 0.00 | 0.00 | 0.00 | 1.333  | no  | no  |
| EARP_00013139-RA | I742V  | 0.80 | 1.00 | 1.00 | 1.00 | 0.467  | no  | no  |
| EARP_00013139-RA | Q44R   | 0.00 | 1.00 | 1.00 | 1.00 | -0.391 | yes | no  |
| EARP_00013139-RA | T1428A | 0.50 | 0.00 | 0.00 | 0.00 | -0.216 | no  | no  |
| EARP_00013142-RA | T43S   | 1.00 | 0.00 | 0.00 | 0.00 | -4.000 | no  | yes |
| EARP_00013786-RA | F42S   | 0.00 | 1.00 | 1.00 | 1.00 | 1.747  | yes | no  |
| EARP_00014053-RA | R263C  | 0.00 | 0.00 | 0.13 | 0.50 | -3.196 | no  | no  |
| EARP_00014072-RA | Y80F   | 0.70 | 1.00 | 0.88 | 1.00 | -0.948 | no  | no  |
| EARP_00014073-RD | R56H   | 1.00 | 0.00 | 0.00 | 0.00 | -5.000 | no  | yes |
| EARP_00014240-RA | V119M  | 0.10 | 1.00 | 1.00 | 1.00 | -0.100 | no  | no  |
| EARP_00014598-RB | E7K    | 1.00 | 0.00 | 0.00 | 0.00 | -0.036 | no  | yes |
| EARP_00014598-RB | V1549I | 0.00 | 1.00 | 1.00 | 1.00 | -0.021 | yes | no  |
| EARP_00015100-RA | A116E  | 0.00 | 1.00 | 1.00 | 1.00 | 0.886  | yes | no  |
| EARP_00015100-RA | E97D   | 0.90 | 0.00 | 0.00 | 0.00 | -0.202 | no  | no  |
| EARP_00015100-RA | G177D  | 1.00 | 0.00 | 0.00 | 0.00 | 1.921  | no  | yes |
| EARP_00015100-RA | L9P    | 0.00 | 1.00 | 1.00 | 1.00 | -0.022 | yes | no  |
| EARP_00015807-RA | L58V   | 0.00 | 1.00 | 1.00 | 1.00 | -3.000 | yes | no  |
| EARP_00015807-RA | L78P   | 0.10 | 1.00 | 1.00 | 1.00 | -7.000 | no  | no  |
| EARP_00015808-RA | C10R   | 1.00 | 0.00 | 0.00 | 0.00 | 0.349  | no  | yes |
| EARP_00015808-RA | H23Y   | 0.00 | 1.00 | 1.00 | 1.00 | -0.193 | yes | no  |
| EARP_00015808-RA | L484P  | 0.00 | 1.00 | 1.00 | 1.00 | 3.432  | yes | no  |
| EARP_00016036-RA | P908S  | 0.00 | 1.00 | 1.00 | 0.50 | 1.395  | yes | no  |

|                  |        |      |      |      |      |        |     |     |
|------------------|--------|------|------|------|------|--------|-----|-----|
| EARP_00016471-RA | E1545K | 0.90 | 1.00 | 1.00 | 1.00 | 0.792  | no  | no  |
| EARP_00016471-RA | Q1996H | 0.50 | 1.00 | 1.00 | 1.00 | -0.655 | no  | no  |
| EARP_00016471-RA | V4I    | 0.00 | 1.00 | 1.00 | 1.00 | -0.355 | yes | no  |
| EARP_00017025-RF | A628G  | 0.00 | 1.00 | 1.00 | 1.00 | -0.100 | yes | no  |
| EARP_00017025-RF | R140H  | 0.70 | 0.00 | 0.00 | 0.00 | -0.158 | no  | no  |
| EARP_00017027-RB | S286P  | 0.70 | 0.00 | 0.00 | 0.00 | -0.730 | no  | no  |
| EARP_00017032-RA | V374I  | 1.00 | 0.00 | 0.00 | 0.00 | 0.314  | no  | yes |
| EARP_00017036-RA | E450D  | 0.10 | 1.00 | 1.00 | 1.00 | -1.894 | no  | no  |
| EARP_00017036-RA | R488C  | 0.90 | 0.00 | 0.00 | 0.00 | 0.244  | no  | no  |
| EARP_00017036-RA | V85I   | 0.20 | 1.00 | 1.00 | 1.00 | 0.964  | no  | no  |
| EARP_00017037-RD | T735A  | 0.30 | 1.00 | 1.00 | 1.00 | 0.873  | no  | no  |
| EARP_00017072-RA | Q136R  | 0.00 | 1.00 | 1.00 | 1.00 | -0.347 | yes | no  |
| EARP_00017811-RA | L136I  | 0.40 | 1.00 | 1.00 | 1.00 | 0.386  | no  | no  |
| EARP_00017811-RA | M336I  | 1.00 | 1.00 | 1.00 | 0.00 | -1.846 | no  | no  |
| EARP_00017811-RA | V1139A | 1.00 | 1.00 | 1.00 | 1.00 | 0.466  | no  | no  |

---

Dataset S6: Genetic diversity of the potential adaptive genes. The genetic diversity is the average value of sites-pi within each gene. Blue represents *Crossoptilon auritum*. Brown-W, Brown-C, and Brown-E represent the Western, Central, and Eastern populations of *Crossoptilon mantchuricum*, respectively.

| Gene ID       | Genetic diversity (II) |         |         |         |
|---------------|------------------------|---------|---------|---------|
|               | Blue                   | Brown-W | Brown-C | Brown-E |
| EARP_00000007 | 0.00                   | 0.00    | 0.00    | 0.00    |
| EARP_00000044 | 0.49                   | 0.00    | 0.00    | 0.00    |
| EARP_00000045 | 0.18                   | 0.02    | 0.02    | 0.04    |
| EARP_00000046 | 0.17                   | 0.03    | 0.02    | 0.11    |
| EARP_00000047 | 0.24                   | 0.02    | 0.02    | 0.09    |
| EARP_00000048 | 0.00                   | 0.00    | 0.00    | 0.00    |
| EARP_00000097 | 0.32                   | 0.00    | 0.01    | 0.00    |
| EARP_00000191 | 0.05                   | 0.52    | 0.46    | 0.12    |
| EARP_00000192 | 0.29                   | 0.00    | 0.00    | 0.06    |
| EARP_00000193 | 0.20                   | 0.07    | 0.07    | 0.04    |
| EARP_00000194 | 0.29                   | 0.00    | 0.00    | 0.00    |
| EARP_00009935 | 0.31                   | 0.00    | 0.00    | 0.00    |
| EARP_00010171 | 0.00                   | 0.00    | 0.00    | 0.00    |
| EARP_00010172 | 0.48                   | 0.00    | 0.00    | 0.00    |
| EARP_00010173 | 0.21                   | 0.03    | 0.03    | 0.00    |
| EARP_00010174 | 0.10                   | 0.00    | 0.00    | 0.00    |
| EARP_00010175 | 0.23                   | 0.02    | 0.02    | 0.00    |
| EARP_00002145 | 0.34                   | 0.00    | 0.01    | 0.01    |
| EARP_00002146 | 0.18                   | 0.00    | 0.00    | 0.00    |
| EARP_00002147 | 0.02                   | 0.00    | 0.15    | 0.00    |
| EARP_00002148 | 0.51                   | 0.00    | 0.00    | 0.00    |
| EARP_00002231 | 0.15                   | 0.00    | 0.05    | 0.21    |
| EARP_00002232 | 0.25                   | 0.00    | 0.06    | 0.05    |
| EARP_00002233 | 0.32                   | 0.00    | 0.05    | 0.05    |
| EARP_00002234 | 0.15                   | 0.00    | 0.06    | 0.05    |
| EARP_00002248 | 0.17                   | 0.03    | 0.04    | 0.01    |
| EARP_00002249 | 0.31                   | 0.00    | 0.00    | 0.01    |
| EARP_00002250 | 0.30                   | 0.00    | 0.00    | 0.00    |
| EARP_00011416 | 0.30                   | 0.00    | 0.00    | 0.01    |
| EARP_00011418 | 0.14                   | 0.00    | 0.00    | 0.00    |
| EARP_00011419 | 0.40                   | 0.00    | 0.00    | 0.00    |
| EARP_00011420 | 0.26                   | 0.00    | 0.00    | 0.00    |
| EARP_00011586 | 0.19                   | 0.00    | 0.00    | 0.00    |
| EARP_00011725 | 0.36                   | 0.00    | 0.06    | 0.00    |
| EARP_00002633 | 0.28                   | 0.00    | 0.00    | 0.00    |
| EARP_00002634 | 0.30                   | 0.00    | 0.00    | 0.00    |
| EARP_00002780 | 0.25                   | 0.00    | 0.00    | 0.03    |

|               |      |      |      |      |
|---------------|------|------|------|------|
| EARP_00002781 | 0.00 | 0.00 | 0.00 | 0.00 |
| EARP_00002782 | 0.23 | 0.00 | 0.00 | 0.00 |
| EARP_00002783 | 0.10 | 0.00 | 0.00 | 0.44 |
| EARP_00012228 | 0.00 | 0.00 | 0.00 | 0.00 |
| EARP_00012748 | 0.35 | 0.00 | 0.00 | 0.01 |
| EARP_00012749 | 0.26 | 0.00 | 0.03 | 0.02 |
| EARP_00012844 | 0.32 | 0.01 | 0.00 | 0.00 |
| EARP_00012845 | 0.00 | 0.00 | 0.00 | 0.00 |
| EARP_00012846 | 0.19 | 0.00 | 0.00 | 0.00 |
| EARP_00012847 | 0.28 | 0.00 | 0.00 | 0.00 |
| EARP_00012848 | 0.22 | 0.01 | 0.10 | 0.00 |
| EARP_00012849 | 0.00 | 0.00 | 0.00 | 0.00 |
| EARP_00012850 | 0.23 | 0.00 | 0.08 | 0.00 |
| EARP_00012816 | 0.19 | 0.00 | 0.00 | 0.00 |
| EARP_00012944 | 0.29 | 0.00 | 0.00 | 0.00 |
| EARP_00012945 | 0.18 | 0.00 | 0.00 | 0.00 |
| EARP_00012946 | 0.00 | 0.00 | 0.00 | 0.00 |
| EARP_00013130 | 0.28 | 0.00 | 0.03 | 0.00 |
| EARP_00013131 | 0.26 | 0.00 | 0.02 | 0.00 |
| EARP_00013132 | 0.00 | 0.00 | 0.00 | 0.00 |
| EARP_00013133 | 0.20 | 0.00 | 0.02 | 0.00 |
| EARP_00013134 | 0.18 | 0.00 | 0.01 | 0.00 |
| EARP_00013135 | 0.23 | 0.00 | 0.02 | 0.00 |
| EARP_00013136 | 0.00 | 0.00 | 0.00 | 0.00 |
| EARP_00013137 | 0.07 | 0.00 | 0.05 | 0.00 |
| EARP_00013138 | 0.31 | 0.00 | 0.02 | 0.00 |
| EARP_00013139 | 0.41 | 0.00 | 0.01 | 0.00 |
| EARP_00013142 | 0.28 | 0.01 | 0.01 | 0.00 |
| EARP_00003307 | 0.38 | 0.00 | 0.00 | 0.01 |
| EARP_00013446 | 0.31 | 0.00 | 0.00 | 0.00 |
| EARP_00013447 | 0.17 | 0.00 | 0.00 | 0.00 |
| EARP_00013448 | 0.13 | 0.00 | 0.00 | 0.00 |
| EARP_00013449 | 0.30 | 0.00 | 0.00 | 0.00 |
| EARP_00013450 | 0.28 | 0.00 | 0.00 | 0.00 |
| EARP_00003347 | 0.41 | 0.00 | 0.00 | 0.00 |
| EARP_00003349 | 0.09 | 0.00 | 0.00 | 0.04 |
| EARP_00013785 | 0.21 | 0.00 | 0.05 | 0.00 |
| EARP_00013786 | 0.15 | 0.00 | 0.00 | 0.00 |
| EARP_00013787 | 0.36 | 0.00 | 0.05 | 0.00 |
| EARP_00000455 | 0.14 | 0.00 | 0.00 | 0.00 |
| EARP_00003474 | 0.00 | 0.00 | 0.00 | 0.00 |
| EARP_00013794 | 0.22 | 0.00 | 0.00 | 0.02 |
| EARP_00014053 | 0.21 | 0.00 | 0.01 | 0.05 |
| EARP_00014054 | 0.44 | 0.00 | 0.00 | 0.00 |

|               |      |      |      |      |
|---------------|------|------|------|------|
| EARP_00014069 | 0.27 | 0.00 | 0.02 | 0.00 |
| EARP_00014070 | 0.00 | 0.00 | 0.00 | 0.00 |
| EARP_00014071 | 0.22 | 0.00 | 0.17 | 0.00 |
| EARP_00014072 | 0.32 | 0.00 | 0.41 | 0.00 |
| EARP_00014073 | 0.14 | 0.05 | 0.05 | 0.04 |
| EARP_00014074 | 0.11 | 0.03 | 0.34 | 0.17 |
| EARP_00014075 | 0.00 | 0.00 | 0.50 | 0.23 |
| EARP_00003544 | 0.40 | 0.00 | 0.00 | 0.00 |
| EARP_00003545 | 0.33 | 0.00 | 0.00 | 0.00 |
| EARP_00003546 | 0.25 | 0.00 | 0.00 | 0.00 |
| EARP_00003547 | 0.32 | 0.01 | 0.02 | 0.00 |
| EARP_00003548 | 0.18 | 0.04 | 0.10 | 0.00 |
| EARP_00003549 | 0.20 | 0.00 | 0.00 | 0.00 |
| EARP_00003550 | 0.17 | 0.29 | 0.07 | 0.00 |
| EARP_00014238 | 0.20 | 0.00 | 0.03 | 0.01 |
| EARP_00014239 | 0.25 | 0.02 | 0.03 | 0.01 |
| EARP_00014240 | 0.14 | 0.00 | 0.01 | 0.00 |
| EARP_00014241 | 0.07 | 0.00 | 0.00 | 0.00 |
| EARP_00014242 | 0.19 | 0.00 | 0.00 | 0.00 |
| EARP_00014598 | 0.18 | 0.00 | 0.06 | 0.00 |
| EARP_00014599 | 0.36 | 0.00 | 0.10 | 0.00 |
| EARP_00014600 | 0.32 | 0.01 | 0.00 | 0.00 |
| EARP_00014601 | 0.25 | 0.00 | 0.00 | 0.00 |
| EARP_00015100 | 0.10 | 0.01 | 0.02 | 0.00 |
| EARP_00015101 | 0.25 | 0.01 | 0.02 | 0.02 |
| EARP_00015102 | 0.36 | 0.00 | 0.00 | 0.00 |
| EARP_00015103 | 0.36 | 0.00 | 0.00 | 0.00 |
| EARP_00003923 | 0.35 | 0.00 | 0.03 | 0.00 |
| EARP_00015598 | 0.00 | 0.00 | 0.00 | 0.00 |
| EARP_00015599 | 0.00 | 0.00 | 0.00 | 0.00 |
| EARP_00015806 | 0.28 | 0.22 | 0.00 | 0.18 |
| EARP_00015807 | 0.24 | 0.03 | 0.00 | 0.01 |
| EARP_00015808 | 0.23 | 0.00 | 0.00 | 0.00 |
| EARP_00016029 | 0.06 | 0.12 | 0.18 | 0.13 |
| EARP_00016030 | 0.00 | 0.00 | 0.00 | 0.00 |
| EARP_00016031 | 0.19 | 0.00 | 0.00 | 0.00 |
| EARP_00016032 | 0.13 | 0.10 | 0.13 | 0.13 |
| EARP_00016033 | 0.14 | 0.09 | 0.08 | 0.13 |
| EARP_00016034 | 0.13 | 0.12 | 0.18 | 0.00 |
| EARP_00016035 | 0.19 | 0.00 | 0.00 | 0.00 |
| EARP_00016036 | 0.09 | 0.04 | 0.06 | 0.20 |
| EARP_00016102 | 0.12 | 0.00 | 0.00 | 0.00 |
| EARP_00000574 | 0.10 | 0.00 | 0.00 | 0.00 |
| EARP_00000596 | 0.16 | 0.00 | 0.05 | 0.03 |

|               |      |      |      |      |
|---------------|------|------|------|------|
| EARP_00000597 | 0.25 | 0.04 | 0.04 | 0.04 |
| EARP_00000598 | 0.00 | 0.00 | 0.00 | 0.00 |
| EARP_00004745 | 0.26 | 0.00 | 0.01 | 0.03 |
| EARP_00004746 | 0.31 | 0.00 | 0.00 | 0.53 |
| EARP_00016471 | 0.33 | 0.00 | 0.01 | 0.00 |
| EARP_00016472 | 0.31 | 0.00 | 0.00 | 0.00 |
| EARP_00016473 | 0.27 | 0.00 | 0.00 | 0.00 |
| EARP_00016474 | 0.22 | 0.00 | 0.00 | 0.00 |
| EARP_00016475 | 0.27 | 0.00 | 0.02 | 0.00 |
| EARP_00017025 | 0.32 | 0.00 | 0.00 | 0.00 |
| EARP_00017026 | 0.41 | 0.00 | 0.00 | 0.00 |
| EARP_00017027 | 0.27 | 0.00 | 0.00 | 0.02 |
| EARP_00017028 | 0.34 | 0.00 | 0.00 | 0.00 |
| EARP_00017029 | 0.16 | 0.00 | 0.00 | 0.02 |
| EARP_00017030 | 0.02 | 0.00 | 0.00 | 0.00 |
| EARP_00017031 | 0.30 | 0.00 | 0.00 | 0.00 |
| EARP_00017032 | 0.37 | 0.00 | 0.00 | 0.00 |
| EARP_00017033 | 0.38 | 0.00 | 0.00 | 0.05 |
| EARP_00017034 | 0.13 | 0.00 | 0.20 | 0.00 |
| EARP_00017035 | 0.00 | 0.00 | 0.00 | 0.00 |
| EARP_00017036 | 0.25 | 0.00 | 0.00 | 0.00 |
| EARP_00017037 | 0.27 | 0.00 | 0.03 | 0.02 |
| EARP_00017038 | 0.04 | 0.00 | 0.05 | 0.00 |
| EARP_00017066 | 0.20 | 0.00 | 0.01 | 0.00 |
| EARP_00017067 | 0.26 | 0.00 | 0.06 | 0.00 |
| EARP_00017068 | 0.18 | 0.00 | 0.00 | 0.00 |
| EARP_00017069 | 0.39 | 0.00 | 0.01 | 0.00 |
| EARP_00017070 | 0.34 | 0.00 | 0.01 | 0.00 |
| EARP_00017071 | 0.29 | 0.00 | 0.00 | 0.00 |
| EARP_00017072 | 0.37 | 0.01 | 0.01 | 0.00 |
| EARP_00005078 | 0.17 | 0.00 | 0.08 | 0.16 |
| EARP_00005079 | 0.13 | 0.00 | 0.00 | 0.00 |
| EARP_00005080 | 0.30 | 0.00 | 0.00 | 0.00 |
| EARP_00017302 | 0.43 | 0.00 | 0.00 | 0.00 |
| EARP_00017303 | 0.24 | 0.00 | 0.00 | 0.07 |
| EARP_00017606 | 0.00 | 0.00 | 0.00 | 0.00 |
| EARP_00017607 | 0.09 | 0.00 | 0.00 | 0.00 |
| EARP_00017698 | 0.00 | 0.00 | 0.00 | 0.00 |
| EARP_00017699 | 0.25 | 0.00 | 0.00 | 0.00 |
| EARP_00017707 | 0.44 | 0.00 | 0.00 | 0.00 |
| EARP_00017708 | 0.17 | 0.05 | 0.14 | 0.00 |
| EARP_00017709 | 0.24 | 0.02 | 0.05 | 0.00 |
| EARP_00017809 | 0.10 | 0.00 | 0.00 | 0.01 |
| EARP_00017810 | 0.06 | 0.00 | 0.00 | 0.00 |

|               |      |      |      |      |
|---------------|------|------|------|------|
| EARP_00017811 | 0.08 | 0.00 | 0.00 | 0.00 |
| EARP_00017812 | 0.10 | 0.00 | 0.00 | 0.00 |
| EARP_00006312 | 0.33 | 0.00 | 0.03 | 0.00 |
| EARP_00006313 | 0.31 | 0.00 | 0.03 | 0.00 |
| EARP_00006329 | 0.36 | 0.00 | 0.00 | 0.00 |
| EARP_00006344 | 0.34 | 0.00 | 0.11 | 0.00 |
| EARP_00006349 | 0.23 | 0.00 | 0.01 | 0.27 |
| EARP_00006350 | 0.31 | 0.00 | 0.03 | 0.06 |
| EARP_00006351 | 0.26 | 0.00 | 0.00 | 0.02 |
| EARP_00006352 | 0.00 | 0.00 | 0.00 | 0.00 |
| EARP_00006353 | 0.04 | 0.00 | 0.02 | 0.43 |
| EARP_00006354 | 0.17 | 0.00 | 0.00 | 0.33 |
| EARP_00006355 | 0.14 | 0.00 | 0.01 | 0.15 |
| EARP_00006356 | 0.28 | 0.00 | 0.03 | 0.17 |
| EARP_00006357 | 0.19 | 0.00 | 0.13 | 0.00 |
| EARP_00000889 | 0.23 | 0.00 | 0.00 | 0.26 |
| EARP_00006613 | 0.25 | 0.00 | 0.02 | 0.00 |
| EARP_00006614 | 0.24 | 0.00 | 0.02 | 0.00 |
| EARP_00006615 | 0.00 | 0.00 | 0.00 | 0.00 |
| EARP_00006616 | 0.38 | 0.00 | 0.00 | 0.00 |
| EARP_00018561 | 0.11 | 0.00 | 0.00 | 0.00 |
| EARP_00018562 | 0.26 | 0.00 | 0.00 | 0.00 |
| EARP_00018563 | 0.00 | 0.00 | 0.00 | 0.00 |
| EARP_00018564 | 0.00 | 0.00 | 0.00 | 0.00 |
| EARP_00006824 | 0.34 | 0.06 | 0.06 | 0.00 |
| EARP_00006825 | 0.19 | 0.07 | 0.08 | 0.00 |
| EARP_00000981 | 0.28 | 0.28 | 0.13 | 0.11 |
| EARP_00000982 | 0.26 | 0.00 | 0.00 | 0.04 |
| EARP_00000983 | 0.13 | 0.07 | 0.03 | 0.00 |
| EARP_00000984 | 0.17 | 0.03 | 0.01 | 0.01 |
| EARP_00000985 | 0.00 | 0.00 | 0.00 | 0.00 |
| EARP_00000986 | 0.12 | 0.08 | 0.04 | 0.07 |
| EARP_00000987 | 0.14 | 0.04 | 0.02 | 0.03 |
| EARP_00000988 | 0.13 | 0.00 | 0.00 | 0.04 |
| EARP_00000989 | 0.14 | 0.03 | 0.02 | 0.02 |
| EARP_00000990 | 0.20 | 0.03 | 0.01 | 0.02 |
| EARP_00007488 | 0.38 | 0.00 | 0.04 | 0.00 |
| EARP_00007489 | 0.35 | 0.00 | 0.09 | 0.00 |
| EARP_00007490 | 0.29 | 0.01 | 0.04 | 0.00 |
| EARP_00007491 | 0.16 | 0.00 | 0.03 | 0.00 |
| EARP_00007492 | 0.13 | 0.00 | 0.03 | 0.00 |
| EARP_00007493 | 0.24 | 0.00 | 0.02 | 0.00 |
| EARP_00007494 | 0.27 | 0.00 | 0.02 | 0.00 |
| EARP_00007499 | 0.28 | 0.03 | 0.08 | 0.00 |



|               |      |      |      |      |
|---------------|------|------|------|------|
| EARP_00007507 | 0.14 | 0.14 | 0.06 | 0.00 |
| EARP_00007508 | 0.00 | 0.00 | 0.00 | 0.00 |
| EARP_00007509 | 0.07 | 0.01 | 0.03 | 0.00 |
| EARP_00007510 | 0.14 | 0.01 | 0.00 | 0.00 |
| EARP_00007511 | 0.04 | 0.01 | 0.02 | 0.00 |
| EARP_00007512 | 0.06 | 0.01 | 0.02 | 0.00 |
| EARP_00007520 | 0.00 | 0.00 | 0.00 | 0.00 |
| EARP_00007521 | 0.20 | 0.00 | 0.01 | 0.00 |
| EARP_00007522 | 0.20 | 0.00 | 0.00 | 0.00 |
| EARP_00007523 | 0.15 | 0.09 | 0.11 | 0.00 |
| EARP_00018845 | 0.52 | 0.00 | 0.00 | 0.00 |
| EARP_00018891 | 0.48 | 0.00 | 0.00 | 0.00 |
| EARP_00018892 | 0.00 | 0.00 | 0.00 | 0.00 |
| EARP_00018893 | 0.46 | 0.00 | 0.00 | 0.00 |
| EARP_00018894 | 0.37 | 0.00 | 0.00 | 0.00 |
| EARP_00018895 | 0.00 | 0.00 | 0.00 | 0.00 |
| EARP_00018896 | 0.47 | 0.00 | 0.00 | 0.00 |
| EARP_00018902 | 0.05 | 0.00 | 0.00 | 0.00 |
| EARP_00008168 | 0.23 | 0.00 | 0.16 | 0.00 |
| EARP_00008169 | 0.09 | 0.00 | 0.02 | 0.00 |
| EARP_00008170 | 0.00 | 0.00 | 0.00 | 0.00 |
| EARP_00008578 | 0.19 | 0.08 | 0.06 | 0.00 |
| EARP_00008598 | 0.33 | 0.00 | 0.01 | 0.00 |
| EARP_00008599 | 0.31 | 0.00 | 0.02 | 0.00 |
| EARP_00008600 | 0.24 | 0.00 | 0.07 | 0.00 |
| EARP_00008601 | 0.37 | 0.00 | 0.02 | 0.00 |
| EARP_00008602 | 0.21 | 0.00 | 0.09 | 0.00 |
| EARP_00008603 | 0.29 | 0.00 | 0.06 | 0.00 |
| EARP_00008888 | 0.23 | 0.09 | 0.02 | 0.10 |
| EARP_00011127 | 0.00 | 0.00 | 0.00 | 0.00 |
| EARP_00011128 | 0.00 | 0.00 | 0.00 | 0.00 |
| EARP_00011129 | 0.15 | 0.03 | 0.01 | 0.00 |
| EARP_00011680 | 0.05 | 0.00 | 0.00 | 0.00 |
| EARP_00011865 | 0.12 | 0.00 | 0.01 | 0.03 |
| EARP_00011866 | 0.05 | 0.00 | 0.00 | 0.00 |
| EARP_00011867 | 0.15 | 0.00 | 0.00 | 0.00 |
| EARP_00011868 | 0.02 | 0.00 | 0.00 | 0.05 |
| EARP_00011869 | 0.07 | 0.00 | 0.00 | 0.00 |
| EARP_00012502 | 0.00 | 0.00 | 0.00 | 0.05 |
| EARP_00012505 | 0.16 | 0.00 | 0.00 | 0.00 |
| EARP_00012506 | 0.00 | 0.00 | 0.00 | 0.00 |
| EARP_00012507 | 0.00 | 0.00 | 0.00 | 0.00 |
| EARP_00012508 | 0.07 | 0.00 | 0.00 | 0.00 |
| EARP_00012509 | 0.22 | 0.00 | 0.00 | 0.00 |

|               |      |      |      |      |
|---------------|------|------|------|------|
| EARP_00012510 | 0.10 | 0.00 | 0.00 | 0.01 |
| EARP_00012511 | 0.18 | 0.04 | 0.07 | 0.01 |
| EARP_00012512 | 0.20 | 0.00 | 0.00 | 0.00 |
| EARP_00012513 | 0.13 | 0.00 | 0.00 | 0.01 |
| EARP_00012514 | 0.31 | 0.00 | 0.00 | 0.00 |
| EARP_00012515 | 0.07 | 0.00 | 0.00 | 0.00 |
| EARP_00012516 | 0.01 | 0.00 | 0.00 | 0.00 |
| EARP_00012517 | 0.05 | 0.00 | 0.00 | 0.01 |
| EARP_00012518 | 0.07 | 0.00 | 0.00 | 0.00 |
| EARP_00012519 | 0.12 | 0.00 | 0.00 | 0.00 |
| EARP_00012520 | 0.13 | 0.00 | 0.00 | 0.00 |
| EARP_00012521 | 0.09 | 0.00 | 0.00 | 0.01 |
| EARP_00013700 | 0.20 | 0.00 | 0.00 | 0.00 |
| EARP_00013701 | 0.22 | 0.00 | 0.00 | 0.00 |
| EARP_00013702 | 0.00 | 0.00 | 0.00 | 0.00 |
| EARP_00013703 | 0.02 | 0.00 | 0.00 | 0.00 |
| EARP_00013704 | 0.12 | 0.07 | 0.06 | 0.03 |
| EARP_00014256 | 0.10 | 0.00 | 0.00 | 0.00 |
| EARP_00014257 | 0.12 | 0.00 | 0.01 | 0.01 |
| EARP_00014258 | 0.10 | 0.00 | 0.00 | 0.02 |
| EARP_00014259 | 0.12 | 0.00 | 0.01 | 0.02 |
| EARP_00014269 | 0.37 | 0.00 | 0.00 | 0.00 |
| EARP_00014270 | 0.32 | 0.17 | 0.18 | 0.18 |
| EARP_00015298 | 0.22 | 0.00 | 0.00 | 0.00 |
| EARP_00015299 | 0.10 | 0.00 | 0.00 | 0.00 |
| EARP_00015303 | 0.21 | 0.00 | 0.01 | 0.00 |
| EARP_00015304 | 0.05 | 0.00 | 0.00 | 0.03 |
| EARP_00015305 | 0.14 | 0.00 | 0.00 | 0.01 |
| EARP_00015306 | 0.11 | 0.00 | 0.00 | 0.00 |
| EARP_00015426 | 0.27 | 0.00 | 0.00 | 0.01 |
| EARP_00005020 | 0.34 | 0.00 | 0.00 | 0.00 |
| EARP_00005021 | 0.00 | 0.00 | 0.00 | 0.00 |
| EARP_00005022 | 0.05 | 0.00 | 0.04 | 0.00 |
| EARP_00005028 | 0.06 | 0.01 | 0.02 | 0.00 |
| EARP_00017436 | 0.00 | 0.00 | 0.00 | 0.00 |
| EARP_00017437 | 0.05 | 0.00 | 0.00 | 0.02 |
| EARP_00017591 | 0.12 | 0.01 | 0.01 | 0.01 |
| EARP_00017592 | 0.08 | 0.00 | 0.00 | 0.00 |
| EARP_00017593 | 0.28 | 0.31 | 0.30 | 0.24 |
| EARP_00006966 | 0.17 | 0.00 | 0.00 | 0.00 |
| EARP_00006967 | 0.10 | 0.00 | 0.00 | 0.00 |
| EARP_00008636 | 0.20 | 0.00 | 0.00 | 0.01 |
| EARP_00008638 | 0.00 | 0.00 | 0.00 | 0.00 |
| EARP_00008639 | 0.07 | 0.00 | 0.00 | 0.00 |

|               |      |      |      |      |
|---------------|------|------|------|------|
| EARP_00008640 | 0.00 | 0.00 | 0.00 | 0.00 |
| EARP_00008641 | 0.00 | 0.00 | 0.00 | 0.00 |
| EARP_00008643 | 0.26 | 0.00 | 0.00 | 0.02 |
| EARP_00008644 | 0.10 | 0.18 | 0.20 | 0.00 |
| EARP_00008645 | 0.08 | 0.00 | 0.00 | 0.00 |
| EARP_00008646 | 0.08 | 0.00 | 0.00 | 0.00 |
| EARP_00009516 | 0.31 | 0.00 | 0.02 | 0.00 |
| Average       | 0.19 | 0.01 | 0.03 | 0.02 |

---

Dataset S7: Likelihood analysis of different evolutionary scenarios. In the models, S represents consistent small population size, D represents population decline, I indicates that there was no gene flow between adjacent populations, WCE indicates that there was gene flow between adjacent populations, CW indicates that the gene flow only existed between the Western and Central populations, CE indicates that migration only occurred between the Central and Eastern populations, and IN indicates that inbreeding occurred. The likelihood (ln) was estimated using fastsimcoal2. d represents the number of parameters in the different models. AIC represents the Akaike information criterion. w represents Akaike weight.

| Models   | ln(Likelihood) | d     | AIC <sub>i</sub> | $\Delta_i$ | w <sub>i</sub> |
|----------|----------------|-------|------------------|------------|----------------|
| S+I      | -47915.76      | 9.00  | 95849.52         | 6566.44    | 0.00           |
| S+WCE    | -45039.69      | 23.00 | 90125.37         | 842.30     | 0.00           |
| S+CW     | -45231.52      | 16.00 | 90495.04         | 1211.96    | 0.00           |
| S+CE     | -44783.52      | 16.00 | 89599.04         | 315.97     | 0.00           |
| D+I      | -44617.25      | 28.00 | 89290.49         | 7.42       | 0.02           |
| D+WCE    | -54029.39      | 34.00 | 108126.79        | 18843.71   | 0.00           |
| D+CW     | -44689.21      | 31.00 | 89440.41         | 157.34     | 0.00           |
| D+CE     | -44653.58      | 31.00 | 89369.16         | 86.09      | 0.00           |
| S+I+IN   | -47926.01      | 12.00 | 95876.01         | 6592.94    | 0.00           |
| S+WCE+IN | -45031.20      | 26.00 | 90114.40         | 831.32     | 0.00           |
| S+CW+IN  | -45232.04      | 19.00 | 90502.07         | 1219.00    | 0.00           |
| S+CE+IN  | -44771.16      | 19.00 | 89580.32         | 297.25     | 0.00           |
| D+I+IN   | -44610.54      | 31.00 | 89283.07         | 0.00       | 0.98           |
| D+WCE+IN | -47953.29      | 37.00 | 95980.58         | 6697.50    | 0.00           |
| D+CW+IN  | -44692.62      | 34.00 | 89453.24         | 170.16     | 0.00           |
| D+CE+IN  | -44657.87      | 34.00 | 89383.75         | 100.67     | 0.00           |

Dataset S8: Model probability estimated in Migrate-N. Brown-W, Brown-C, and Brown-E indicate the Western, Central, and Eastern populations of *Crossoptilon mantchuricum*, respectively. ml is the marginal likelihood. bf is the Bayes factor.

| Model                                  | Log(ml)  | Log(bf) | Model-probability | Custom migration model                  |
|----------------------------------------|----------|---------|-------------------|-----------------------------------------|
| Migration between adjacent populations | -1403.43 | -7.87   | 0.0004            | Brown-W, Brown-C, Brown-E={**0 *** 0**} |
| Migration between Brown-W and Brown-C  | -1402.01 | -6.45   | 0.0015            | Brown-W, Brown-C, Brown-E={**0 **0 00*} |
| Migration between Brown-C and Brown-E  | -1398.59 | -3.03   | 0.046             | Brown-W, Brown-C, Brown-E={*00 0** 0**} |
| Isolation                              | -1395.56 | 0       | 0.9521            | Brown-W, Brown-C, Brown-E={*00 0*0 00*} |

Dataset S9: Sample information, coverage, and mapping rate. The asterisks mark the individuals that were excluded from the population genetic analysis because they had a close relationship (duplicate/MZ twin, 1st-degree) with at least one individual in the corresponding population. The sequence data of all individuals were deposited in the National Genomics Data Center (<https://bigd.big.ac.cn/?lang=en>). Readers can use the accession number to find the data in the National Genomics Data Center Databases.

| Species                | Location                    | Tissue type | Gender | Sample index | Sample ID | Sequencing type | Sequencing coverage (×) | Mapping rate | Accession number |
|------------------------|-----------------------------|-------------|--------|--------------|-----------|-----------------|-------------------------|--------------|------------------|
| <i>C. auritum</i>      | Gansu                       | Blood       | Female | 1            | CA00      | Re-sequencing   | 41.57                   | 98.53%       | SAMC226688       |
| <i>C. auritum</i>      | Gansu                       | Blood       | Female | 2            | CA01      | Re-sequencing   | 16.03                   | 97.86%       | SAMC226689       |
| <i>C. auritum</i>      | Gansu                       | Blood       | Male   | 3            | CA02      | Re-sequencing   | 17.06                   | 98.48%       | SAMC226690       |
| <i>C. auritum</i>      | Gansu                       | Blood       | Female | 4            | CA03*     | Re-sequencing   | 16.73                   | 98.24%       | SAMC226691       |
| <i>C. auritum</i>      | Gansu                       | Blood       | Female | 5            | CA04      | Re-sequencing   | 20.68                   | 98.49%       | SAMC226692       |
| <i>C. auritum</i>      | Gansu                       | Blood       | Female | 6            | CA05      | Re-sequencing   | 17.67                   | 98.05%       | SAMC226693       |
| <i>C. auritum</i>      | Gansu                       | Blood       | Male   | 7            | CA06      | Re-sequencing   | 18.96                   | 98.58%       | SAMC226694       |
| <i>C. auritum</i>      | Gansu                       | Blood       | Male   | 8            | CA07      | Re-sequencing   | 16.48                   | 98.74%       | SAMC226695       |
| <i>C. auritum</i>      | Gansu                       | Blood       | Male   | 9            | CA08      | Re-sequencing   | 16.33                   | 98.68%       | SAMC226696       |
| <i>C. auritum</i>      | Gansu                       | Blood       | Male   | 10           | CA09      | Re-sequencing   | 16.93                   | 98.54%       | SAMC226697       |
| <i>C. auritum</i>      | Gansu                       | Blood       | Female | 11           | CA10      | Re-sequencing   | 18.20                   | 98.09%       | SAMC226698       |
| <i>C. mantchuricum</i> | Shaanxi(Western population) | Blood       | Female | 12           | CMAA00    | Re-sequencing   | 43.17                   | 98.59%       | SAMC226699       |
| <i>C. mantchuricum</i> | Shaanxi(Western population) | Blood       | Female | 13           | CMAA01    | Re-sequencing   | 15.60                   | 98.54%       | SAMC226700       |

|                        |                             |        |        |    |         |               |       |        |            |
|------------------------|-----------------------------|--------|--------|----|---------|---------------|-------|--------|------------|
| <i>C. mantchuricum</i> | Shaanxi(Western population) | Blood  | Male   | 14 | CMAA02  | Re-sequencing | 15.89 | 98.65% | SAMC226701 |
| <i>C. mantchuricum</i> | Shaanxi(Western population) | Muscle | Female | 15 | CMAA03  | Re-sequencing | 15.31 | 97.56% | SAMC226702 |
| <i>C. mantchuricum</i> | Shaanxi(Western population) | Blood  | Male   | 16 | CMAA04* | Re-sequencing | 17.64 | 98.85% | SAMC226703 |
| <i>C. mantchuricum</i> | Shaanxi(Western population) | Blood  | Female | 17 | CMAA05  | Re-sequencing | 18.86 | 97.42% | SAMC226704 |
| <i>C. mantchuricum</i> | Shaanxi(Western population) | Blood  | Male   | 18 | CMAA06  | Re-sequencing | 18.56 | 93.89% | SAMC226705 |
| <i>C. mantchuricum</i> | Shaanxi(Western population) | Blood  | Female | 19 | CMAA07* | Re-sequencing | 16.07 | 95.51% | SAMC226706 |
| <i>C. mantchuricum</i> | Shaanxi(Western population) | Blood  | Female | 20 | CMAA08  | Re-sequencing | 20.81 | 98.60% | SAMC226707 |
| <i>C. mantchuricum</i> | Shaanxi(Western population) | Blood  | Female | 21 | CMAA09* | Re-sequencing | 15.53 | 98.75% | SAMC226708 |
| <i>C. mantchuricum</i> | Shaanxi(Western population) | Blood  | Female | 22 | CMAA10  | Re-sequencing | 13.42 | 86.63% | SAMC226709 |
| <i>C. mantchuricum</i> | Shaanxi(Western population) | Blood  | Male   | 23 | CMAA11* | Re-sequencing | 21.99 | 96.29% | SAMC226710 |
| <i>C. mantchuricum</i> | Shaanxi(Western population) | Blood  | Female | 24 | CMAA12* | Re-sequencing | 19.77 | 96.96% | SAMC226711 |
| <i>C. mantchuricum</i> | Shaanxi(Western population) | Blood  | Female | 25 | CMAA13  | Re-sequencing | 18.19 | 97.43% | SAMC226712 |
| <i>C. mantchuricum</i> | Shaanxi(Western population) | Blood  | Female | 26 | CMAA14  | Re-sequencing | 18.36 | 96.47% | SAMC226713 |
| <i>C. mantchuricum</i> | Shaanxi(Western population) | Blood  | Female | 27 | CMAA15* | Re-sequencing | 15.59 | 93.59% | SAMC226714 |
| <i>C. mantchuricum</i> | Shaanxi(Western population) | Blood  | Male   | 28 | CMAA16  | Re-sequencing | 16.82 | 97.81% | SAMC226715 |
| <i>C. mantchuricum</i> | Shaanxi(Western population) | Blood  | Male   | 29 | CMAA17* | Re-sequencing | 13.60 | 83.55% | SAMC226716 |
| <i>C. mantchuricum</i> | Shanxi(Central population)  | Muscle | Male   | 30 | CMA04*  | Re-sequencing | 15.94 | 98.39% | SAMC226717 |

|                        |                            |        |        |    |        |               |       |        |            |
|------------------------|----------------------------|--------|--------|----|--------|---------------|-------|--------|------------|
| <i>C. mantchuricum</i> | Shanxi(Central population) | Blood  | Female | 31 | CMA08  | Re-sequencing | 15.21 | 98.24% | SAMC226718 |
| <i>C. mantchuricum</i> | Shanxi(Central population) | Muscle | Female | 32 | CMA09  | Re-sequencing | 19.23 | 97.51% | SAMC226719 |
| <i>C. mantchuricum</i> | Shanxi(Central population) | Liver  | Female | 33 | CMA10* | Re-sequencing | 16.77 | 97.81% | SAMC226720 |
| <i>C. mantchuricum</i> | Shanxi(Central population) | Muscle | Female | 34 | CMA11  | Re-sequencing | 19.53 | 96.86% | SAMC226721 |
| <i>C. mantchuricum</i> | Shanxi(Central population) | Liver  | Female | 35 | CMA12  | Re-sequencing | 18.26 | 97.80% | SAMC226722 |
| <i>C. mantchuricum</i> | Shanxi(Central population) | Liver  | Male   | 36 | CMA13  | Re-sequencing | 21.46 | 97.98% | SAMC226723 |
| <i>C. mantchuricum</i> | Shanxi(Central population) | Liver  | Male   | 37 | CMA14  | Re-sequencing | 19.13 | 98.39% | SAMC226724 |
| <i>C. mantchuricum</i> | Shanxi(Central population) | Liver  | Female | 38 | CMA15* | Re-sequencing | 18.19 | 97.54% | SAMC226725 |
| <i>C. mantchuricum</i> | Shanxi(Central population) | Muscle | Female | 39 | CMA16  | Re-sequencing | 16.03 | 97.79% | SAMC226726 |
| <i>C. mantchuricum</i> | Shanxi(Central population) | Muscle | Male   | 40 | CMA18  | Re-sequencing | 15.32 | 97.62% | SAMC226727 |
| <i>C. mantchuricum</i> | Hebei(Eastern population)  | Blood  | Male   | 41 | CMH00  | Re-sequencing | 36.59 | 98.26% | SAMC226728 |
| <i>C. mantchuricum</i> | Hebei(Eastern population)  | Blood  | Female | 42 | CMH01  | Re-sequencing | 17.40 | 98.53% | SAMC226729 |
| <i>C. mantchuricum</i> | Hebei(Eastern population)  | Blood  | Male   | 43 | CMH02  | Re-sequencing | 19.22 | 98.65% | SAMC226730 |
| <i>C. mantchuricum</i> | Hebei(Eastern population)  | Blood  | Female | 44 | CMH03  | Re-sequencing | 19.54 | 98.12% | SAMC226731 |
| <i>C. mantchuricum</i> | Hebei(Eastern population)  | Muscle | Male   | 45 | CMH04* | Re-sequencing | 18.79 | 97.85% | SAMC226732 |
| <i>C. mantchuricum</i> | Hebei(Eastern population)  | Blood  | Male   | 46 | CMH05  | Re-sequencing | 18.30 | 98.63% | SAMC226733 |
| <i>C. mantchuricum</i> | Hebei(Eastern population)  | Muscle | Male   | 47 | CMH06  | Re-sequencing | 19.69 | 97.85% | SAMC226734 |



|                        |                            |        |        |    |        |                       |        |        |            |
|------------------------|----------------------------|--------|--------|----|--------|-----------------------|--------|--------|------------|
| <i>C. mantchuricum</i> | Hebei(Eastern population)  | Blood  | Female | 48 | CMH07* | Re-sequencing         | 17.60  | 98.34% | SAMC226735 |
| <i>C. mantchuricum</i> | Hebei(Eastern population)  | Blood  | Female | 49 | CMH08  | Re-sequencing         | 15.51  | 97.95% | SAMC226736 |
| <i>C. mantchuricum</i> | Hebei(Eastern population)  | Blood  | Female | 50 | CMH09  | Re-sequencing         | 18.92  | 98.19% | SAMC226737 |
| <i>C. mantchuricum</i> | Hebei(Eastern population)  | Muscle | Male   | 51 | CMH12* | Re-sequencing         | 17.60  | 97.77% | SAMC226738 |
| <i>C. mantchuricum</i> | Shanxi(Central population) | Blood  | Female | 52 | CMA00* | De novo<br>sequencing | 201.75 | N      | SAMC226739 |

---

Dataset S10: The relationship of each sample in each population inferred by the King program. Blue indicates *Crossoptilon auritum*. Brown-W, Brown-C, and Brown-E indicate the Western, Central, and Eastern populations of *Crossoptilon manchuricum*, respectively. ID1: The first individual of the pair; ID2: The second individual of the pair; N\_SNP: The number of SNPS that do not have missing SNPS in either of the individuals; HetHet: Percentage of SNPs with double heterozygotes; IBS0: Proportion of SNPs with 0-IBS (identical-by-state); Kinship: Kinship coefficient estimated by the program. The asterisks mark the individuals that were excluded in the downstream analysis.

| Population | ID1  | ID2  | N_SNP   | HetHet | IBS0   | Kinship |
|------------|------|------|---------|--------|--------|---------|
| Blue       | CA00 | CA1  | 2275444 | 15.29% | 8.02%  | -0.06   |
| Blue       | CA00 | CA10 | 2275444 | 12.22% | 12.15% | -0.20   |
| Blue       | CA00 | CA2  | 2275444 | 13.75% | 7.01%  | 0.00    |
| Blue       | CA00 | CA3* | 2275444 | 13.94% | 7.15%  | -0.01   |
| Blue       | CA00 | CA4  | 2275444 | 11.88% | 12.58% | -0.23   |
| Blue       | CA00 | CA5  | 2275444 | 12.65% | 9.10%  | -0.10   |
| Blue       | CA00 | CA6  | 2275444 | 12.14% | 12.50% | -0.22   |
| Blue       | CA00 | CA7  | 2275444 | 11.95% | 12.38% | -0.21   |
| Blue       | CA00 | CA8  | 2275444 | 12.02% | 12.52% | -0.22   |
| Blue       | CA00 | CA9  | 2275444 | 12.15% | 12.33% | -0.21   |
| Blue       | CA1  | CA10 | 2275444 | 15.29% | 7.84%  | -0.06   |
| Blue       | CA1  | CA2  | 2275444 | 15.24% | 7.92%  | -0.06   |
| Blue       | CA1  | CA3* | 2275444 | 17.07% | 0.30%  | 0.21    |
| Blue       | CA1  | CA4  | 2275444 | 14.83% | 8.22%  | -0.09   |
| Blue       | CA1  | CA5  | 2275444 | 14.68% | 8.77%  | -0.11   |
| Blue       | CA1  | CA6  | 2275444 | 15.06% | 8.01%  | -0.08   |
| Blue       | CA1  | CA7  | 2275444 | 15.06% | 8.17%  | -0.08   |
| Blue       | CA1  | CA8  | 2275444 | 14.94% | 8.36%  | -0.09   |
| Blue       | CA1  | CA9  | 2275444 | 15.15% | 7.82%  | -0.07   |
| Blue       | CA10 | CA2  | 2275444 | 12.19% | 12.07% | -0.19   |
| Blue       | CA10 | CA3* | 2275444 | 12.59% | 12.35% | -0.20   |
| Blue       | CA10 | CA4  | 2275444 | 13.34% | 7.26%  | -0.03   |
| Blue       | CA10 | CA5  | 2275444 | 12.04% | 11.43% | -0.18   |
| Blue       | CA10 | CA6  | 2275444 | 13.54% | 7.25%  | -0.02   |
| Blue       | CA10 | CA7  | 2275444 | 13.39% | 7.44%  | -0.03   |
| Blue       | CA10 | CA8  | 2275444 | 13.30% | 7.30%  | -0.03   |
| Blue       | CA10 | CA9  | 2275444 | 13.39% | 7.49%  | -0.03   |
| Blue       | CA2  | CA3* | 2275444 | 13.73% | 7.19%  | -0.02   |
| Blue       | CA2  | CA4  | 2275444 | 12.00% | 12.38% | -0.22   |
| Blue       | CA2  | CA5  | 2275444 | 12.55% | 9.02%  | -0.10   |
| Blue       | CA2  | CA6  | 2275444 | 12.05% | 12.22% | -0.21   |
| Blue       | CA2  | CA7  | 2275444 | 12.16% | 12.21% | -0.20   |
| Blue       | CA2  | CA8  | 2275444 | 11.95% | 12.25% | -0.21   |
| Blue       | CA2  | CA9  | 2275444 | 12.20% | 12.12% | -0.20   |
| Blue       | CA3* | CA4  | 2275444 | 12.33% | 12.66% | -0.23   |
| Blue       | CA3* | CA5  | 2275444 | 12.95% | 9.17%  | -0.10   |
| Blue       | CA3* | CA6  | 2275444 | 12.36% | 12.56% | -0.22   |
| Blue       | CA3* | CA7  | 2275444 | 12.51% | 12.56% | -0.22   |
| Blue       | CA3* | CA8  | 2275444 | 12.39% | 12.66% | -0.23   |
| Blue       | CA3* | CA9  | 2275444 | 12.57% | 12.53% | -0.21   |
| Blue       | CA4  | CA5  | 2275444 | 11.66% | 11.95% | -0.20   |

|         |         |         |         |        |        |       |
|---------|---------|---------|---------|--------|--------|-------|
| Blue    | CA4     | CA6     | 2275444 | 13.02% | 7.41%  | -0.03 |
| Blue    | CA4     | CA7     | 2275444 | 13.20% | 7.05%  | -0.02 |
| Blue    | CA4     | CA8     | 2275444 | 13.06% | 7.44%  | -0.03 |
| Blue    | CA4     | CA9     | 2275444 | 13.01% | 7.46%  | -0.03 |
| Blue    | CA5     | CA6     | 2275444 | 11.78% | 11.62% | -0.18 |
| Blue    | CA5     | CA7     | 2275444 | 11.91% | 11.58% | -0.18 |
| Blue    | CA5     | CA8     | 2275444 | 11.73% | 11.61% | -0.19 |
| Blue    | CA5     | CA9     | 2275444 | 11.96% | 11.63% | -0.18 |
| Blue    | CA6     | CA7     | 2275444 | 13.28% | 7.55%  | -0.03 |
| Blue    | CA6     | CA8     | 2275444 | 13.00% | 7.30%  | -0.03 |
| Blue    | CA6     | CA9     | 2275444 | 13.17% | 7.09%  | -0.02 |
| Blue    | CA7     | CA8     | 2275444 | 13.15% | 7.40%  | -0.03 |
| Blue    | CA7     | CA9     | 2275444 | 13.46% | 6.85%  | 0.00  |
| Blue    | CA8     | CA9     | 2275444 | 13.21% | 7.50%  | -0.03 |
| Brown-W | CMAA00  | CMAA1   | 2275444 | 0.98%  | 0.53%  | -0.03 |
| Brown-W | CMAA00  | CMAA10  | 2275444 | 0.79%  | 0.61%  | -0.20 |
| Brown-W | CMAA00  | CMAA11* | 2275444 | 1.24%  | 0.20%  | 0.14  |
| Brown-W | CMAA00  | CMAA12* | 2275444 | 1.02%  | 0.69%  | -0.09 |
| Brown-W | CMAA00  | CMAA13  | 2275444 | 1.16%  | 0.34%  | 0.05  |
| Brown-W | CMAA00  | CMAA14  | 2275444 | 1.39%  | 0.43%  | 0.07  |
| Brown-W | CMAA00  | CMAA15* | 2275444 | 1.33%  | 0.40%  | 0.07  |
| Brown-W | CMAA00  | CMAA16  | 2275444 | 1.26%  | 0.27%  | 0.09  |
| Brown-W | CMAA00  | CMAA17* | 2275444 | 1.10%  | 0.60%  | -0.03 |
| Brown-W | CMAA1   | CMAA10  | 2275444 | 1.05%  | 0.22%  | 0.07  |
| Brown-W | CMAA1   | CMAA11* | 2275444 | 1.06%  | 0.45%  | 0.02  |
| Brown-W | CMAA1   | CMAA12* | 2275444 | 0.90%  | 0.93%  | -0.18 |
| Brown-W | CMAA1   | CMAA13  | 2275444 | 0.96%  | 0.35%  | 0.03  |
| Brown-W | CMAA1   | CMAA14  | 2275444 | 1.19%  | 0.44%  | 0.02  |
| Brown-W | CMAA1   | CMAA15* | 2275444 | 1.30%  | 0.25%  | 0.10  |
| Brown-W | CMAA1   | CMAA16  | 2275444 | 1.46%  | 0.33%  | 0.09  |
| Brown-W | CMAA1   | CMAA17* | 2275444 | 1.07%  | 0.49%  | 0.01  |
| Brown-W | CMAA10  | CMAA11* | 2275444 | 0.70%  | 0.50%  | -0.15 |
| Brown-W | CMAA10  | CMAA12* | 2275444 | 0.65%  | 0.77%  | -0.28 |
| Brown-W | CMAA10  | CMAA13  | 2275444 | 0.76%  | 0.60%  | -0.15 |
| Brown-W | CMAA10  | CMAA14  | 2275444 | 0.89%  | 0.50%  | -0.15 |
| Brown-W | CMAA10  | CMAA15* | 2275444 | 0.98%  | 0.61%  | -0.19 |
| Brown-W | CMAA10  | CMAA16  | 2275444 | 0.96%  | 0.48%  | -0.15 |
| Brown-W | CMAA10  | CMAA17* | 2275444 | 0.73%  | 0.68%  | -0.23 |
| Brown-W | CMAA11* | CMAA12* | 2275444 | 0.98%  | 0.63%  | -0.06 |
| Brown-W | CMAA11* | CMAA13  | 2275444 | 1.40%  | 0.05%  | 0.23  |
| Brown-W | CMAA11* | CMAA14  | 2275444 | 1.12%  | 0.43%  | 0.01  |
| Brown-W | CMAA11* | CMAA15* | 2275444 | 1.45%  | 0.12%  | 0.18  |
| Brown-W | CMAA11* | CMAA16  | 2275444 | 1.57%  | 0.22%  | 0.16  |
| Brown-W | CMAA11* | CMAA17* | 2275444 | 1.18%  | 0.27%  | 0.11  |
| Brown-W | CMAA12* | CMAA13  | 2275444 | 0.84%  | 0.70%  | -0.14 |
| Brown-W | CMAA12* | CMAA14  | 2275444 | 1.03%  | 0.65%  | -0.09 |
| Brown-W | CMAA12* | CMAA15* | 2275444 | 1.10%  | 0.63%  | -0.08 |
| Brown-W | CMAA12* | CMAA16  | 2275444 | 1.13%  | 0.82%  | -0.16 |
| Brown-W | CMAA12* | CMAA17* | 2275444 | 0.82%  | 0.98%  | -0.22 |
| Brown-W | CMAA13  | CMAA14  | 2275444 | 1.16%  | 0.44%  | -0.01 |
| Brown-W | CMAA13  | CMAA15* | 2275444 | 1.28%  | 0.15%  | 0.12  |
| Brown-W | CMAA13  | CMAA16  | 2275444 | 1.33%  | 0.26%  | 0.08  |
| Brown-W | CMAA13  | CMAA17* | 2275444 | 1.10%  | 0.35%  | 0.05  |

|         |         |         |         |       |       |       |
|---------|---------|---------|---------|-------|-------|-------|
| Brown-W | CMAA14  | CMAA15* | 2275444 | 1.27% | 0.43% | 0.06  |
| Brown-W | CMAA14  | CMAA16  | 2275444 | 1.42% | 0.24% | 0.14  |
| Brown-W | CMAA14  | CMAA17* | 2275444 | 1.11% | 0.50% | -0.02 |
| Brown-W | CMAA15* | CMAA16  | 2275444 | 1.73% | 0.02% | 0.26  |
| Brown-W | CMAA15* | CMAA17* | 2275444 | 1.37% | 0.04% | 0.20  |
| Brown-W | CMAA16  | CMAA17* | 2275444 | 1.94% | 0.21% | 0.23  |
| Brown-W | CMAA00  | CMAA2   | 2275444 | 0.62% | 1.05% | -0.65 |
| Brown-W | CMAA00  | CMAA3   | 2275444 | 1.48% | 0.59% | 0.00  |
| Brown-W | CMAA00  | CMAA4*  | 2275444 | 1.20% | 0.52% | 0.00  |
| Brown-W | CMAA00  | CMAA5   | 2275444 | 1.33% | 0.63% | -0.01 |
| Brown-W | CMAA00  | CMAA6   | 2275444 | 1.21% | 0.52% | 0.00  |
| Brown-W | CMAA00  | CMAA7*  | 2275444 | 0.90% | 0.69% | -0.09 |
| Brown-W | CMAA00  | CMAA8   | 2275444 | 1.52% | 0.60% | 0.04  |
| Brown-W | CMAA00  | CMAA9*  | 2275444 | 1.02% | 0.68% | -0.07 |
| Brown-W | CMAA1   | CMAA2   | 2275444 | 0.86% | 0.02% | 0.09  |
| Brown-W | CMAA1   | CMAA3   | 2275444 | 1.08% | 0.58% | -0.09 |
| Brown-W | CMAA1   | CMAA4*  | 2275444 | 1.19% | 0.62% | -0.05 |
| Brown-W | CMAA1   | CMAA5   | 2275444 | 0.83% | 0.41% | -0.04 |
| Brown-W | CMAA1   | CMAA6   | 2275444 | 1.20% | 0.62% | -0.05 |
| Brown-W | CMAA1   | CMAA7*  | 2275444 | 1.07% | 0.95% | -0.18 |
| Brown-W | CMAA1   | CMAA8   | 2275444 | 1.08% | 0.30% | 0.05  |
| Brown-W | CMAA1   | CMAA9*  | 2275444 | 1.10% | 0.61% | -0.05 |
| Brown-W | CMAA10  | CMAA2   | 2275444 | 0.69% | 0.73% | -0.31 |
| Brown-W | CMAA10  | CMAA3   | 2275444 | 1.03% | 0.63% | -0.22 |
| Brown-W | CMAA10  | CMAA4*  | 2275444 | 0.82% | 0.57% | -0.20 |
| Brown-W | CMAA10  | CMAA5   | 2275444 | 0.81% | 0.42% | -0.14 |
| Brown-W | CMAA10  | CMAA6   | 2275444 | 0.83% | 0.56% | -0.20 |
| Brown-W | CMAA10  | CMAA7*  | 2275444 | 0.79% | 0.99% | -0.38 |
| Brown-W | CMAA10  | CMAA8   | 2275444 | 0.73% | 0.48% | -0.18 |
| Brown-W | CMAA10  | CMAA9*  | 2275444 | 0.85% | 0.72% | -0.25 |
| Brown-W | CMAA11* | CMAA2   | 2275444 | 0.71% | 0.75% | -0.42 |
| Brown-W | CMAA11* | CMAA3   | 2275444 | 1.30% | 0.40% | 0.03  |
| Brown-W | CMAA11* | CMAA4*  | 2275444 | 1.23% | 0.36% | 0.06  |
| Brown-W | CMAA11* | CMAA5   | 2275444 | 1.20% | 0.38% | 0.05  |
| Brown-W | CMAA11* | CMAA6   | 2275444 | 1.24% | 0.35% | 0.06  |
| Brown-W | CMAA11* | CMAA7*  | 2275444 | 1.02% | 0.49% | -0.01 |
| Brown-W | CMAA11* | CMAA8   | 2275444 | 1.37% | 0.47% | 0.05  |
| Brown-W | CMAA11* | CMAA9*  | 2275444 | 1.18% | 0.52% | 0.01  |
| Brown-W | CMAA12* | CMAA2   | 2275444 | 0.40% | 1.08% | -0.71 |
| Brown-W | CMAA12* | CMAA3   | 2275444 | 1.00% | 0.67% | -0.14 |
| Brown-W | CMAA12* | CMAA4*  | 2275444 | 1.20% | 0.52% | -0.02 |
| Brown-W | CMAA12* | CMAA5   | 2275444 | 1.48% | 0.12% | 0.19  |
| Brown-W | CMAA12* | CMAA6   | 2275444 | 1.21% | 0.52% | -0.02 |
| Brown-W | CMAA12* | CMAA7*  | 2275444 | 1.00% | 0.76% | -0.12 |
| Brown-W | CMAA12* | CMAA8   | 2275444 | 1.40% | 0.79% | -0.08 |
| Brown-W | CMAA12* | CMAA9*  | 2275444 | 1.26% | 0.69% | -0.05 |
| Brown-W | CMAA13  | CMAA2   | 2275444 | 0.64% | 0.65% | -0.33 |
| Brown-W | CMAA13  | CMAA3   | 2275444 | 1.19% | 0.49% | -0.06 |
| Brown-W | CMAA13  | CMAA4*  | 2275444 | 1.08% | 0.51% | -0.06 |
| Brown-W | CMAA13  | CMAA5   | 2275444 | 1.04% | 0.37% | -0.01 |
| Brown-W | CMAA13  | CMAA6   | 2275444 | 1.09% | 0.50% | -0.06 |
| Brown-W | CMAA13  | CMAA7*  | 2275444 | 0.80% | 0.62% | -0.14 |
| Brown-W | CMAA13  | CMAA8   | 2275444 | 1.09% | 0.25% | 0.05  |

|         |         |        |         |       |       |       |
|---------|---------|--------|---------|-------|-------|-------|
| Brown-W | CMAA13  | CMAA9* | 2275444 | 0.98% | 0.46% | -0.04 |
| Brown-W | CMAA14  | CMAA2  | 2275444 | 0.66% | 0.75% | -0.49 |
| Brown-W | CMAA14  | CMAA3  | 2275444 | 1.44% | 0.45% | 0.06  |
| Brown-W | CMAA14  | CMAA4* | 2275444 | 1.25% | 0.60% | 0.01  |
| Brown-W | CMAA14  | CMAA5  | 2275444 | 1.19% | 0.37% | 0.07  |
| Brown-W | CMAA14  | CMAA6  | 2275444 | 1.26% | 0.59% | 0.01  |
| Brown-W | CMAA14  | CMAA7* | 2275444 | 1.26% | 0.88% | -0.11 |
| Brown-W | CMAA14  | CMAA8  | 2275444 | 1.36% | 0.29% | 0.12  |
| Brown-W | CMAA14  | CMAA9* | 2275444 | 1.24% | 0.65% | -0.02 |
| Brown-W | CMAA15* | CMAA2  | 2275444 | 0.81% | 0.54% | -0.33 |
| Brown-W | CMAA15* | CMAA3  | 2275444 | 1.37% | 0.40% | 0.07  |
| Brown-W | CMAA15* | CMAA4* | 2275444 | 1.34% | 0.50% | 0.05  |
| Brown-W | CMAA15* | CMAA5  | 2275444 | 1.57% | 0.55% | 0.07  |
| Brown-W | CMAA15* | CMAA6  | 2275444 | 1.35% | 0.49% | 0.06  |
| Brown-W | CMAA15* | CMAA7* | 2275444 | 1.16% | 0.66% | -0.05 |
| Brown-W | CMAA15* | CMAA8  | 2275444 | 1.28% | 0.31% | 0.10  |
| Brown-W | CMAA15* | CMAA9* | 2275444 | 1.43% | 0.60% | 0.02  |
| Brown-W | CMAA16  | CMAA2  | 2275444 | 1.01% | 0.52% | -0.27 |
| Brown-W | CMAA16  | CMAA3  | 2275444 | 1.50% | 0.44% | 0.08  |
| Brown-W | CMAA16  | CMAA4* | 2275444 | 1.30% | 0.36% | 0.08  |
| Brown-W | CMAA16  | CMAA5  | 2275444 | 1.33% | 0.47% | 0.05  |
| Brown-W | CMAA16  | CMAA6  | 2275444 | 1.31% | 0.36% | 0.09  |
| Brown-W | CMAA16  | CMAA7* | 2275444 | 1.24% | 0.56% | -0.01 |
| Brown-W | CMAA16  | CMAA8  | 2275444 | 1.35% | 0.37% | 0.08  |
| Brown-W | CMAA16  | CMAA9* | 2275444 | 1.28% | 0.64% | -0.03 |
| Brown-W | CMAA17* | CMAA2  | 2275444 | 0.73% | 0.50% | -0.26 |
| Brown-W | CMAA17* | CMAA3  | 2275444 | 1.30% | 0.42% | 0.02  |
| Brown-W | CMAA17* | CMAA4* | 2275444 | 1.13% | 0.70% | -0.09 |
| Brown-W | CMAA17* | CMAA5  | 2275444 | 1.05% | 0.51% | -0.03 |
| Brown-W | CMAA17* | CMAA6  | 2275444 | 1.14% | 0.69% | -0.08 |
| Brown-W | CMAA17* | CMAA7* | 2275444 | 0.79% | 0.79% | -0.16 |
| Brown-W | CMAA17* | CMAA8  | 2275444 | 1.05% | 0.56% | -0.05 |
| Brown-W | CMAA17* | CMAA9* | 2275444 | 0.93% | 0.77% | -0.14 |
| Brown-W | CMAA2   | CMAA3  | 2275444 | 0.78% | 0.84% | -0.56 |
| Brown-W | CMAA2   | CMAA4* | 2275444 | 0.69% | 0.85% | -0.55 |
| Brown-W | CMAA2   | CMAA5  | 2275444 | 0.71% | 0.66% | -0.42 |
| Brown-W | CMAA2   | CMAA6  | 2275444 | 0.70% | 0.84% | -0.55 |
| Brown-W | CMAA2   | CMAA7* | 2275444 | 0.52% | 1.18% | -0.77 |
| Brown-W | CMAA2   | CMAA8  | 2275444 | 0.60% | 0.72% | -0.49 |
| Brown-W | CMAA2   | CMAA9* | 2275444 | 0.61% | 0.82% | -0.53 |
| Brown-W | CMAA3   | CMAA4* | 2275444 | 1.19% | 0.33% | 0.06  |
| Brown-W | CMAA3   | CMAA5  | 2275444 | 1.40% | 0.45% | 0.06  |
| Brown-W | CMAA3   | CMAA6  | 2275444 | 1.20% | 0.32% | 0.07  |
| Brown-W | CMAA3   | CMAA7* | 2275444 | 1.19% | 0.61% | -0.05 |
| Brown-W | CMAA3   | CMAA8  | 2275444 | 1.60% | 0.46% | 0.08  |
| Brown-W | CMAA3   | CMAA9* | 2275444 | 1.24% | 0.35% | 0.05  |
| Brown-W | CMAA4*  | CMAA5  | 2275444 | 1.40% | 0.47% | 0.07  |
| Brown-W | CMAA4*  | CMAA6  | 2275444 | 3.07% | 0.00% | 0.49  |
| Brown-W | CMAA4*  | CMAA7* | 2275444 | 1.27% | 0.03% | 0.19  |
| Brown-W | CMAA4*  | CMAA8  | 2275444 | 1.24% | 0.39% | 0.07  |
| Brown-W | CMAA4*  | CMAA9* | 2275444 | 1.34% | 0.42% | 0.07  |
| Brown-W | CMAA5   | CMAA6  | 2275444 | 1.42% | 0.47% | 0.08  |
| Brown-W | CMAA5   | CMAA7* | 2275444 | 1.00% | 0.54% | -0.04 |

|         |        |        |         |       |       |       |
|---------|--------|--------|---------|-------|-------|-------|
| Brown-W | CMAA5  | CMAA8  | 2275444 | 1.18% | 0.52% | 0.02  |
| Brown-W | CMAA5  | CMAA9* | 2275444 | 1.29% | 0.49% | 0.04  |
| Brown-W | CMAA6  | CMAA7* | 2275444 | 1.28% | 0.02% | 0.19  |
| Brown-W | CMAA6  | CMAA8  | 2275444 | 1.25% | 0.38% | 0.07  |
| Brown-W | CMAA6  | CMAA9* | 2275444 | 1.35% | 0.41% | 0.07  |
| Brown-W | CMAA7* | CMAA8  | 2275444 | 1.18% | 0.65% | -0.04 |
| Brown-W | CMAA7* | CMAA9* | 2275444 | 1.22% | 0.54% | 0.01  |
| Brown-W | CMAA8  | CMAA9* | 2275444 | 1.58% | 0.20% | 0.19  |
| Brown-C | CMA10* | CMA11  | 2275444 | 2.08% | 1.31% | -0.06 |
| Brown-C | CMA10* | CMA12  | 2275444 | 5.28% | 0.00% | 0.49  |
| Brown-C | CMA10* | CMA13  | 2275444 | 2.18% | 1.19% | -0.04 |
| Brown-C | CMA10* | CMA14  | 2275444 | 1.86% | 1.03% | -0.02 |
| Brown-C | CMA11  | CMA12  | 2275444 | 2.10% | 1.30% | -0.06 |
| Brown-C | CMA11  | CMA13  | 2275444 | 2.40% | 0.92% | 0.04  |
| Brown-C | CMA11  | CMA14  | 2275444 | 2.37% | 1.12% | 0.00  |
| Brown-C | CMA12  | CMA13  | 2275444 | 2.19% | 1.19% | -0.03 |
| Brown-C | CMA12  | CMA14  | 2275444 | 1.86% | 1.02% | -0.02 |
| Brown-C | CMA13  | CMA14  | 2275444 | 2.69% | 0.55% | 0.13  |
| Brown-C | CMA10* | CMA15* | 2275444 | 2.10% | 1.08% | -0.04 |
| Brown-C | CMA10* | CMA16  | 2275444 | 1.98% | 1.14% | -0.03 |
| Brown-C | CMA10* | CMA18  | 2275444 | 1.71% | 1.37% | -0.12 |
| Brown-C | CMA10* | CMA4*  | 2275444 | 1.73% | 1.35% | -0.11 |
| Brown-C | CMA10* | CMA8   | 2275444 | 1.76% | 1.64% | -0.24 |
| Brown-C | CMA10* | CMA9   | 2275444 | 1.98% | 1.11% | -0.02 |
| Brown-C | CMA11  | CMA15* | 2275444 | 2.71% | 0.02% | 0.22  |
| Brown-C | CMA11  | CMA16  | 2275444 | 2.12% | 1.29% | -0.05 |
| Brown-C | CMA11  | CMA18  | 2275444 | 1.90% | 1.53% | -0.14 |
| Brown-C | CMA11  | CMA4*  | 2275444 | 1.92% | 1.50% | -0.13 |
| Brown-C | CMA11  | CMA8   | 2275444 | 1.62% | 1.58% | -0.26 |
| Brown-C | CMA11  | CMA9   | 2275444 | 1.95% | 1.45% | -0.10 |
| Brown-C | CMA12  | CMA15* | 2275444 | 2.11% | 1.07% | -0.03 |
| Brown-C | CMA12  | CMA16  | 2275444 | 1.99% | 1.13% | -0.02 |
| Brown-C | CMA12  | CMA18  | 2275444 | 1.72% | 1.36% | -0.12 |
| Brown-C | CMA12  | CMA4*  | 2275444 | 1.74% | 1.35% | -0.11 |
| Brown-C | CMA12  | CMA8   | 2275444 | 1.76% | 1.64% | -0.24 |
| Brown-C | CMA12  | CMA9   | 2275444 | 1.99% | 1.11% | -0.02 |
| Brown-C | CMA13  | CMA15* | 2275444 | 2.46% | 1.24% | -0.01 |
| Brown-C | CMA13  | CMA16  | 2275444 | 2.25% | 1.22% | -0.04 |
| Brown-C | CMA13  | CMA18  | 2275444 | 2.17% | 1.65% | -0.15 |
| Brown-C | CMA13  | CMA4*  | 2275444 | 2.20% | 1.63% | -0.14 |
| Brown-C | CMA13  | CMA8   | 2275444 | 1.57% | 1.58% | -0.27 |
| Brown-C | CMA13  | CMA9   | 2275444 | 2.26% | 0.85% | 0.03  |
| Brown-C | CMA14  | CMA15* | 2275444 | 2.39% | 0.88% | 0.03  |
| Brown-C | CMA14  | CMA16  | 2275444 | 2.18% | 1.09% | 0.00  |
| Brown-C | CMA14  | CMA18  | 2275444 | 2.06% | 1.13% | -0.04 |
| Brown-C | CMA14  | CMA4*  | 2275444 | 2.08% | 1.12% | -0.03 |
| Brown-C | CMA14  | CMA8   | 2275444 | 1.58% | 1.59% | -0.25 |
| Brown-C | CMA14  | CMA9   | 2275444 | 2.25% | 1.02% | 0.02  |
| Brown-C | CMA15* | CMA16  | 2275444 | 2.18% | 1.22% | -0.05 |
| Brown-C | CMA15* | CMA18  | 2275444 | 2.82% | 0.04% | 0.22  |
| Brown-C | CMA15* | CMA4*  | 2275444 | 2.86% | 0.03% | 0.22  |
| Brown-C | CMA15* | CMA8   | 2275444 | 1.73% | 1.56% | -0.27 |
| Brown-C | CMA15* | CMA9   | 2275444 | 2.37% | 1.44% | -0.08 |

|         |        |        |         |       |       |       |
|---------|--------|--------|---------|-------|-------|-------|
| Brown-C | CMA16  | CMA18  | 2275444 | 1.82% | 1.49% | -0.13 |
| Brown-C | CMA16  | CMA4*  | 2275444 | 1.84% | 1.47% | -0.12 |
| Brown-C | CMA16  | CMA8   | 2275444 | 1.52% | 1.51% | -0.24 |
| Brown-C | CMA16  | CMA9   | 2275444 | 2.16% | 1.03% | 0.01  |
| Brown-C | CMA18  | CMA4*  | 2275444 | 4.93% | 0.00% | 0.48  |
| Brown-C | CMA18  | CMA8   | 2275444 | 1.39% | 1.90% | -0.33 |
| Brown-C | CMA18  | CMA9   | 2275444 | 2.03% | 1.55% | -0.12 |
| Brown-C | CMA4*  | CMA8   | 2275444 | 1.40% | 1.88% | -0.32 |
| Brown-C | CMA4*  | CMA9   | 2275444 | 2.05% | 1.54% | -0.11 |
| Brown-C | CMA8   | CMA9   | 2275444 | 1.72% | 1.47% | -0.21 |
| Brown-E | CMH00  | CMH1   | 2275444 | 1.69% | 0.31% | 0.18  |
| Brown-E | CMH00  | CMH12* | 2275444 | 1.02% | 1.29% | -0.29 |
| Brown-E | CMH00  | CMH2   | 2275444 | 1.47% | 0.63% | -0.09 |
| Brown-E | CMH00  | CMH3   | 2275444 | 1.32% | 0.60% | -0.09 |
| Brown-E | CMH00  | CMH4*  | 2275444 | 1.03% | 1.27% | -0.26 |
| Brown-E | CMH00  | CMH5   | 2275444 | 1.28% | 0.77% | -0.09 |
| Brown-E | CMH00  | CMH6   | 2275444 | 1.03% | 1.28% | -0.27 |
| Brown-E | CMH1   | CMH12* | 2275444 | 1.00% | 1.55% | -0.37 |
| Brown-E | CMH1   | CMH2   | 2275444 | 1.22% | 0.63% | -0.15 |
| Brown-E | CMH1   | CMH3   | 2275444 | 1.43% | 0.89% | -0.18 |
| Brown-E | CMH1   | CMH4*  | 2275444 | 1.02% | 1.53% | -0.37 |
| Brown-E | CMH1   | CMH5   | 2275444 | 1.25% | 0.90% | -0.15 |
| Brown-E | CMH1   | CMH6   | 2275444 | 1.01% | 1.54% | -0.37 |
| Brown-E | CMH12* | CMH2   | 2275444 | 1.25% | 0.63% | -0.15 |
| Brown-E | CMH12* | CMH3   | 2275444 | 1.04% | 1.09% | -0.32 |
| Brown-E | CMH12* | CMH4*  | 2275444 | 2.76% | 0.00% | 0.48  |
| Brown-E | CMH12* | CMH5   | 2275444 | 1.06% | 1.14% | -0.27 |
| Brown-E | CMH12* | CMH6   | 2275444 | 2.77% | 0.00% | 0.49  |
| Brown-E | CMH2   | CMH3   | 2275444 | 2.26% | 0.36% | 0.17  |
| Brown-E | CMH2   | CMH4*  | 2275444 | 1.27% | 0.62% | -0.12 |
| Brown-E | CMH2   | CMH5   | 2275444 | 1.72% | 0.59% | 0.00  |
| Brown-E | CMH2   | CMH6   | 2275444 | 1.27% | 0.62% | -0.14 |
| Brown-E | CMH3   | CMH4*  | 2275444 | 1.07% | 1.08% | -0.29 |
| Brown-E | CMH3   | CMH5   | 2275444 | 1.69% | 0.71% | -0.01 |
| Brown-E | CMH3   | CMH6   | 2275444 | 1.06% | 1.09% | -0.31 |
| Brown-E | CMH4*  | CMH5   | 2275444 | 1.08% | 1.12% | -0.24 |
| Brown-E | CMH4*  | CMH6   | 2275444 | 2.80% | 0.00% | 0.48  |
| Brown-E | CMH5   | CMH6   | 2275444 | 1.07% | 1.13% | -0.26 |
| Brown-E | CMH00  | CMH7*  | 2275444 | 1.28% | 0.81% | -0.09 |
| Brown-E | CMH00  | CMH8   | 2275444 | 1.04% | 1.01% | -0.19 |
| Brown-E | CMH00  | CMH9   | 2275444 | 1.25% | 1.37% | -0.25 |
| Brown-E | CMH1   | CMH7*  | 2275444 | 1.03% | 0.93% | -0.19 |
| Brown-E | CMH1   | CMH8   | 2275444 | 1.07% | 1.08% | -0.23 |
| Brown-E | CMH1   | CMH9   | 2275444 | 1.01% | 1.43% | -0.34 |
| Brown-E | CMH12* | CMH7*  | 2275444 | 0.88% | 1.21% | -0.32 |
| Brown-E | CMH12* | CMH8   | 2275444 | 1.13% | 1.46% | -0.36 |
| Brown-E | CMH12* | CMH9   | 2275444 | 0.83% | 1.45% | -0.38 |
| Brown-E | CMH2   | CMH7*  | 2275444 | 1.85% | 0.68% | -0.01 |
| Brown-E | CMH2   | CMH8   | 2275444 | 1.45% | 0.79% | -0.11 |
| Brown-E | CMH2   | CMH9   | 2275444 | 1.52% | 0.70% | -0.11 |
| Brown-E | CMH3   | CMH7*  | 2275444 | 1.67% | 0.73% | -0.04 |
| Brown-E | CMH3   | CMH8   | 2275444 | 1.23% | 1.17% | -0.24 |
| Brown-E | CMH3   | CMH9   | 2275444 | 1.34% | 0.90% | -0.18 |

|         |       |       |         |       |       |       |
|---------|-------|-------|---------|-------|-------|-------|
| Brown-E | CMH4* | CMH7* | 2275444 | 0.89% | 1.20% | -0.28 |
| Brown-E | CMH4* | CMH8  | 2275444 | 1.16% | 1.45% | -0.32 |
| Brown-E | CMH4* | CMH9  | 2275444 | 0.85% | 1.44% | -0.35 |
| Brown-E | CMH5  | CMH7* | 2275444 | 1.41% | 1.02% | -0.11 |
| Brown-E | CMH5  | CMH8  | 2275444 | 0.90% | 0.92% | -0.16 |
| Brown-E | CMH5  | CMH9  | 2275444 | 1.10% | 0.90% | -0.16 |
| Brown-E | CMH6  | CMH7* | 2275444 | 0.89% | 1.20% | -0.30 |
| Brown-E | CMH6  | CMH8  | 2275444 | 1.15% | 1.45% | -0.34 |
| Brown-E | CMH6  | CMH9  | 2275444 | 0.84% | 1.44% | -0.36 |
| Brown-E | CMH7* | CMH8  | 2275444 | 1.20% | 0.46% | 0.04  |
| Brown-E | CMH7* | CMH9  | 2275444 | 1.95% | 0.13% | 0.25  |
| Brown-E | CMH8  | CMH9  | 2275444 | 0.96% | 0.73% | -0.11 |

---



Dataset S11: Summary metrics of the SNP of each sample. The high-quality SNPs indicate the bases with a call quality of Q20 or higher. The high-coverage sites are at least covered by five reads. Heterozygosity was defined as the number of heterozygous SNPs divided by the total callable sites. Blue indicates *Crossoptilon auritum*, and Brown indicates *Crossoptilon mantchuricum*. A represents autosomes, Z represents the Z chromosome, and M represents the mitogenome.

| Species | Sample ID | Sample index | The percent of high quality SNPs |        |        | The percent of high coverage sites |        |         | The percent of missing SNPs |       |       | The number of heteozygous / substitutions |       | Heterozygosity |         |
|---------|-----------|--------------|----------------------------------|--------|--------|------------------------------------|--------|---------|-----------------------------|-------|-------|-------------------------------------------|-------|----------------|---------|
|         |           |              | A                                | Z      | M      | A                                  | Z      | M       | A                           | Z     | M     | A                                         | Z     | A              | Z       |
| Blue    | CA00      | 1            | 94.78%                           | 93.66% | 95.25% | 98.50%                             | 98.16% | 100.00% | 0.04%                       | 0.28% | 0.00% | 760421                                    | 17881 | 0.00083        | 0.00025 |
| Blue    | CA01      | 2            | 93.13%                           | 92.48% | 95.25% | 97.72%                             | 77.31% | 100.00% | 0.10%                       | 1.34% | 0.00% | 902604                                    | 16246 | 0.00099        | 0.00024 |
| Blue    | CA02      | 3            | 93.78%                           | 94.36% | 95.26% | 97.79%                             | 97.68% | 100.00% | 0.12%                       | 0.12% | 0.00% | 756677                                    | 28595 | 0.00083        | 0.00040 |
| Blue    | CA03      | 4            | 93.19%                           | 92.59% | 95.26% | 97.76%                             | 80.35% | 100.00% | 0.10%                       | 0.93% | 0.00% | 779739                                    | 15933 | 0.00086        | 0.00023 |
| Blue    | CA04      | 5            | 93.69%                           | 92.91% | 95.26% | 98.15%                             | 90.75% | 100.00% | 0.09%                       | 0.62% | 0.00% | 722721                                    | 15973 | 0.00079        | 0.00023 |
| Blue    | CA05      | 6            | 93.39%                           | 92.87% | 95.26% | 97.99%                             | 86.72% | 100.00% | 0.09%                       | 0.63% | 0.00% | 728717                                    | 15723 | 0.00080        | 0.00022 |
| Blue    | CA06      | 7            | 93.77%                           | 94.35% | 95.26% | 97.93%                             | 97.88% | 100.00% | 0.11%                       | 0.14% | 0.00% | 728200                                    | 24951 | 0.00080        | 0.00035 |
| Blue    | CA07      | 8            | 94.50%                           | 94.99% | 95.26% | 96.70%                             | 97.11% | 100.00% | 0.22%                       | 0.13% | 0.00% | 728940                                    | 26981 | 0.00080        | 0.00037 |
| Blue    | CA08      | 9            | 95.00%                           | 95.27% | 95.26% | 97.04%                             | 96.82% | 100.00% | 0.16%                       | 0.22% | 0.00% | 721363                                    | 24411 | 0.00079        | 0.00034 |
| Blue    | CA09      | 10           | 94.22%                           | 94.58% | 95.26% | 97.72%                             | 97.57% | 100.00% | 0.12%                       | 0.08% | 0.00% | 732472                                    | 25416 | 0.00080        | 0.00035 |
| Blue    | CA10      | 11           | 93.63%                           | 92.70% | 95.26% | 98.05%                             | 85.95% | 100.00% | 0.09%                       | 0.63% | 0.00% | 740524                                    | 14987 | 0.00081        | 0.00021 |
| Brown   | CMAA00    | 12           | 94.68%                           | 93.71% | 95.54% | 98.56%                             | 98.30% | 100.00% | 0.01%                       | 0.12% | 0.00% | 68230                                     | 13903 | 0.00007        | 0.00019 |
| Brown   | CMAA01    | 13           | 94.92%                           | 93.99% | 95.54% | 97.34%                             | 77.13% | 100.00% | 0.02%                       | 0.53% | 0.00% | 63205                                     | 10840 | 0.00007        | 0.00016 |
| Brown   | CMAA02    | 14           | 94.39%                           | 94.87% | 95.54% | 97.68%                             | 97.67% | 100.00% | 0.01%                       | 0.02% | 0.00% | 38525                                     | 1403  | 0.00004        | 0.00002 |
| Brown   | CMAA03    | 15           | 92.27%                           | 92.00% | 95.54% | 97.69%                             | 74.81% | 100.00% | 0.02%                       | 0.59% | 0.00% | 80829                                     | 12038 | 0.00009        | 0.00018 |
| Brown   | CMAA04    | 16           | 94.16%                           | 94.80% | 95.54% | 97.73%                             | 97.68% | 100.00% | 0.02%                       | 0.02% | 0.00% | 73818                                     | 1840  | 0.00008        | 0.00003 |
| Brown   | CMAA05    | 17           | 92.22%                           | 91.39% | 95.54% | 98.10%                             | 84.59% | 100.00% | 0.01%                       | 0.41% | 0.00% | 74476                                     | 12417 | 0.00008        | 0.00018 |
| Brown   | CMAA06    | 18           | 93.07%                           | 94.25% | 95.54% | 98.24%                             | 98.08% | 100.00% | 0.01%                       | 0.02% | 0.00% | 75001                                     | 1898  | 0.00008        | 0.00003 |

|       |        |    |        |        |        |        |        |         |       |       |       |        |       |         |         |
|-------|--------|----|--------|--------|--------|--------|--------|---------|-------|-------|-------|--------|-------|---------|---------|
| Brown | CMAA07 | 19 | 92.24% | 91.79% | 95.54% | 97.86% | 77.04% | 100.00% | 0.01% | 0.57% | 0.00% | 68547  | 11875 | 0.00008 | 0.00018 |
| Brown | CMAA08 | 20 | 94.48% | 93.87% | 95.54% | 98.09% | 87.52% | 100.00% | 0.01% | 0.34% | 0.00% | 73400  | 12521 | 0.00008 | 0.00018 |
| Brown | CMAA09 | 21 | 94.84% | 94.33% | 95.54% | 97.00% | 77.02% | 100.00% | 0.03% | 0.53% | 0.00% | 70336  | 11406 | 0.00008 | 0.00017 |
| Brown | CMAA10 | 22 | 91.75% | 89.07% | 95.54% | 83.37% | 45.00% | 100.00% | 0.37% | 4.14% | 0.00% | 49204  | 10382 | 0.00006 | 0.00021 |
| Brown | CMAA11 | 23 | 93.03% | 94.07% | 95.55% | 98.39% | 98.21% | 100.00% | 0.01% | 0.00% | 0.00% | 65444  | 2150  | 0.00007 | 0.00003 |
| Brown | CMAA12 | 24 | 93.93% | 93.48% | 95.55% | 98.21% | 88.87% | 100.00% | 0.01% | 0.36% | 0.00% | 63348  | 13922 | 0.00007 | 0.00020 |
| Brown | CMAA13 | 25 | 92.83% | 92.46% | 95.55% | 98.08% | 83.94% | 100.00% | 0.01% | 0.32% | 0.00% | 58156  | 12005 | 0.00006 | 0.00017 |
| Brown | CMAA14 | 26 | 94.50% | 94.15% | 95.55% | 98.19% | 85.63% | 100.00% | 0.01% | 0.30% | 0.00% | 74402  | 13709 | 0.00008 | 0.00020 |
| Brown | CMAA15 | 27 | 92.62% | 92.41% | 95.55% | 97.76% | 76.50% | 100.00% | 0.01% | 0.59% | 0.00% | 75143  | 12700 | 0.00008 | 0.00019 |
| Brown | CMAA16 | 28 | 91.92% | 92.82% | 95.55% | 97.98% | 97.82% | 100.00% | 0.01% | 0.01% | 0.00% | 77779  | 2145  | 0.00009 | 0.00003 |
| Brown | CMAA17 | 29 | 92.29% | 93.54% | 95.55% | 96.23% | 95.82% | 100.00% | 0.02% | 0.02% | 0.00% | 64647  | 2054  | 0.00007 | 0.00003 |
| Brown | CMA04  | 30 | 93.13% | 94.36% | 95.69% | 97.34% | 97.45% | 100.00% | 0.03% | 0.04% | 0.00% | 120600 | 1294  | 0.00013 | 0.00002 |
| Brown | CMA08  | 31 | 93.96% | 93.37% | 95.71% | 95.55% | 72.05% | 100.00% | 0.05% | 0.97% | 0.00% | 101425 | 13094 | 0.00011 | 0.00020 |
| Brown | CMA09  | 32 | 92.85% | 92.53% | 95.75% | 98.28% | 88.71% | 100.00% | 0.01% | 0.34% | 0.00% | 128238 | 12343 | 0.00014 | 0.00017 |
| Brown | CMA10  | 33 | 92.40% | 92.02% | 95.73% | 98.00% | 81.37% | 100.00% | 0.01% | 0.53% | 0.00% | 127557 | 12243 | 0.00014 | 0.00018 |
| Brown | CMA11  | 34 | 92.69% | 92.46% | 95.30% | 98.15% | 90.29% | 100.00% | 0.01% | 0.39% | 0.00% | 133880 | 12653 | 0.00015 | 0.00018 |
| Brown | CMA12  | 35 | 92.66% | 92.29% | 95.32% | 98.21% | 86.08% | 100.00% | 0.01% | 0.39% | 0.00% | 128242 | 12283 | 0.00014 | 0.00018 |
| Brown | CMA13  | 36 | 92.93% | 94.01% | 95.36% | 98.41% | 98.24% | 100.00% | 0.01% | 0.02% | 0.00% | 136818 | 2837  | 0.00015 | 0.00004 |
| Brown | CMA14  | 37 | 93.14% | 94.20% | 95.36% | 98.16% | 98.08% | 100.00% | 0.02% | 0.02% | 0.00% | 126997 | 2454  | 0.00014 | 0.00003 |
| Brown | CMA15  | 38 | 93.47% | 93.18% | 95.48% | 98.18% | 84.49% | 100.00% | 0.01% | 0.27% | 0.00% | 144027 | 12458 | 0.00016 | 0.00018 |
| Brown | CMA16  | 39 | 92.50% | 92.09% | 95.49% | 97.86% | 79.01% | 100.00% | 0.02% | 0.52% | 0.00% | 127677 | 12222 | 0.00014 | 0.00018 |
| Brown | CMA18  | 40 | 92.79% | 93.93% | 95.53% | 97.38% | 97.07% | 100.00% | 0.02% | 0.03% | 0.00% | 119486 | 1346  | 0.00013 | 0.00002 |
| Brown | CMH00  | 41 | 92.46% | 93.40% | 95.55% | 98.49% | 98.31% | 100.00% | 0.02% | 0.08% | 0.00% | 70061  | 808   | 0.00008 | 0.00001 |
| Brown | CMH01  | 42 | 94.17% | 93.06% | 95.55% | 97.84% | 83.94% | 100.00% | 0.04% | 0.37% | 0.00% | 66657  | 10978 | 0.00007 | 0.00016 |
| Brown | CMH02  | 43 | 94.00% | 94.66% | 95.55% | 98.18% | 98.44% | 100.00% | 0.03% | 0.03% | 0.00% | 105279 | 1392  | 0.00012 | 0.00002 |
| Brown | CMH03  | 44 | 93.44% | 92.77% | 95.55% | 98.19% | 87.08% | 100.00% | 0.02% | 0.35% | 0.00% | 99277  | 13337 | 0.00011 | 0.00019 |
| Brown | CMH04  | 45 | 91.98% | 93.04% | 95.41% | 98.23% | 98.09% | 100.00% | 0.03% | 0.02% | 0.00% | 70004  | 912   | 0.00008 | 0.00001 |
| Brown | CMH05  | 46 | 93.03% | 93.95% | 95.41% | 98.03% | 98.01% | 100.00% | 0.03% | 0.03% | 0.00% | 81476  | 2178  | 0.00009 | 0.00003 |

|       |       |    |        |        |        |        |        |         |       |       |       |       |       |         |         |
|-------|-------|----|--------|--------|--------|--------|--------|---------|-------|-------|-------|-------|-------|---------|---------|
| Brown | CMH06 | 47 | 93.08% | 94.18% | 95.44% | 98.30% | 98.16% | 100.00% | 0.02% | 0.03% | 0.00% | 67604 | 953   | 0.00007 | 0.00001 |
| Brown | CMH07 | 48 | 93.94% | 93.23% | 95.44% | 97.97% | 84.65% | 100.00% | 0.03% | 0.31% | 0.00% | 78353 | 12207 | 0.00009 | 0.00018 |
| Brown | CMH08 | 49 | 92.99% | 92.63% | 95.44% | 97.64% | 77.13% | 100.00% | 0.03% | 0.53% | 0.00% | 77740 | 11520 | 0.00009 | 0.00017 |
| Brown | CMH09 | 50 | 93.38% | 92.78% | 95.45% | 98.13% | 87.84% | 100.00% | 0.02% | 0.32% | 0.00% | 69882 | 12318 | 0.00008 | 0.00018 |
| Brown | CMH12 | 51 | 90.21% | 91.22% | 95.24% | 98.09% | 97.95% | 100.00% | 0.03% | 0.04% | 0.00% | 66594 | 812   | 0.00007 | 0.00001 |

---

Dataset S12: Scaffolds on the sex chromosomes and mitochondrial genome.

| Z chromosome linked scaffolds |                                    | Mitochondria linked scaffolds |                                    |
|-------------------------------|------------------------------------|-------------------------------|------------------------------------|
| Scaffolds                     | The percent of homologous gene (%) | Scaffolds                     | The percent of homologous gene (%) |
| scaffold_74                   | 25                                 | scaffold_1343                 | 100                                |
| scaffold_142                  | 41.38                              | scaffold_1701                 | 100                                |
| scaffold_34                   | 46.24                              | scaffold_1847                 | 100                                |
| scaffold_394                  | 50                                 |                               |                                    |
| scaffold_397                  | 50                                 |                               |                                    |
| scaffold_399                  | 57.14                              |                               |                                    |
| scaffold_215                  | 68.75                              |                               |                                    |
| scaffold_247                  | 70.59                              |                               |                                    |
| scaffold_157                  | 73.33                              |                               |                                    |
| scaffold_79                   | 73.68                              |                               |                                    |
| scaffold_241                  | 75                                 |                               |                                    |
| scaffold_380                  | 75                                 |                               |                                    |
| scaffold_401                  | 75                                 |                               |                                    |
| scaffold_254                  | 76.47                              |                               |                                    |
| scaffold_187                  | 77.08                              |                               |                                    |
| scaffold_62                   | 77.5                               |                               |                                    |
| scaffold_212                  | 80                                 |                               |                                    |
| scaffold_333                  | 80                                 |                               |                                    |
| scaffold_403                  | 80                                 |                               |                                    |
| scaffold_122                  | 80.36                              |                               |                                    |
| scaffold_196                  | 81.48                              |                               |                                    |
| scaffold_291                  | 81.48                              |                               |                                    |
| scaffold_192                  | 82.93                              |                               |                                    |
| scaffold_336                  | 85.71                              |                               |                                    |
| scaffold_349                  | 85.71                              |                               |                                    |
| scaffold_160                  | 86.36                              |                               |                                    |
| scaffold_236                  | 86.36                              |                               |                                    |
| scaffold_113                  | 86.67                              |                               |                                    |
| scaffold_156                  | 86.67                              |                               |                                    |
| scaffold_57                   | 87.04                              |                               |                                    |
| scaffold_93                   | 87.23                              |                               |                                    |
| scaffold_37                   | 88.46                              |                               |                                    |
| scaffold_259                  | 88.89                              |                               |                                    |
| scaffold_136                  | 89.66                              |                               |                                    |

|               |     |
|---------------|-----|
| scaffold_252  | 90  |
| scaffold_1249 | 100 |
| scaffold_1272 | 100 |
| scaffold_194  | 100 |
| scaffold_285  | 100 |
| scaffold_351  | 100 |
| scaffold_357  | 100 |
| scaffold_367  | 100 |
| scaffold_393  | 100 |
| scaffold_427  | 100 |
| scaffold_438  | 100 |
| scaffold_453  | 100 |
| scaffold_582  | 100 |
| scaffold_777  | 100 |
| scaffold_913  | 100 |

---
